# Supplementary material for: Caring and living with Prader-Willi syndrome in Italy: integrating children, adults and parents’ experiences through a multicentre narrative medicine research
Source: PubMed Central journal article supplement — BMJ Open. 2020 Aug 6;10(8):e036502. doi: 10.1136/bmjopen-2019-036502 (PMC7412587; doi:10.1136/bmjopen-2019-036502), 2020-08-06
Supplement: bmjopen-2019-036502.draft_revisions.pdf [file bmjopen-2019-036502.draft_revisions.pdf]

# BMJ Open

BMJ Open is committed to open peer review. As part of this commitment we make the peer review history of every article we publish publicly available.

When an article is published we post the peer reviewers' comments and the authors' responses online. We also post the versions of the paper that were used during peer review. These are the versions that the peer review comments apply to.

The versions of the paper that follow are the versions that were submitted during the peer review process. They are not the versions of record or the final published versions. They should not be cited or distributed as the published version of this manuscript.

BMJ Open is an open access journal and the full, final, typeset and author-corrected version of record of the manuscript is available on our site with no access controls, subscription charges or pay-per-view fees (<http://bmjopen.bmj.com>).

If you have any questions on BMJ Open's open peer review process please email [info.bmjopen@bmj.com](mailto:info.bmjopen@bmj.com)

# BMJ Open

## Caring and living with Prader-Willi syndrome: integrating children's, adults', and parents' experiences through Narrative Medicine

|                               |                                                                                                                                                                                                                                                                                                                                                                                                                                                                                                                                                                                                                                                                                                                                                                                                                                                                                                                                                                                                                                                                                                                                                                                                                                                                                                                                                                                                                                                                                                                                                                                                                                                                                                                                                                                                              |
|-------------------------------|--------------------------------------------------------------------------------------------------------------------------------------------------------------------------------------------------------------------------------------------------------------------------------------------------------------------------------------------------------------------------------------------------------------------------------------------------------------------------------------------------------------------------------------------------------------------------------------------------------------------------------------------------------------------------------------------------------------------------------------------------------------------------------------------------------------------------------------------------------------------------------------------------------------------------------------------------------------------------------------------------------------------------------------------------------------------------------------------------------------------------------------------------------------------------------------------------------------------------------------------------------------------------------------------------------------------------------------------------------------------------------------------------------------------------------------------------------------------------------------------------------------------------------------------------------------------------------------------------------------------------------------------------------------------------------------------------------------------------------------------------------------------------------------------------------------|
| Journal:                      | <i>BMJ Open</i>                                                                                                                                                                                                                                                                                                                                                                                                                                                                                                                                                                                                                                                                                                                                                                                                                                                                                                                                                                                                                                                                                                                                                                                                                                                                                                                                                                                                                                                                                                                                                                                                                                                                                                                                                                                              |
| Manuscript ID                 | bmjopen-2019-036502                                                                                                                                                                                                                                                                                                                                                                                                                                                                                                                                                                                                                                                                                                                                                                                                                                                                                                                                                                                                                                                                                                                                                                                                                                                                                                                                                                                                                                                                                                                                                                                                                                                                                                                                                                                          |
| Article Type:                 | Original research                                                                                                                                                                                                                                                                                                                                                                                                                                                                                                                                                                                                                                                                                                                                                                                                                                                                                                                                                                                                                                                                                                                                                                                                                                                                                                                                                                                                                                                                                                                                                                                                                                                                                                                                                                                            |
| Date Submitted by the Author: | 20-Dec-2019                                                                                                                                                                                                                                                                                                                                                                                                                                                                                                                                                                                                                                                                                                                                                                                                                                                                                                                                                                                                                                                                                                                                                                                                                                                                                                                                                                                                                                                                                                                                                                                                                                                                                                                                                                                                  |
| Complete List of Authors:     | <p>Ragusa, Letizia; OASI Maria SS., Research Institute<br/> Crinò, Antonio; Bambino Gesù Paediatric Hospital - Palidoro, Research Institute<br/> Grugni, Graziano; Istituto Auxologico Italiano , Department of Auxology<br/> Reale, Luigi; ISTUD Foundation<br/> Fiorencis, Alessandra; Fondazione ISTUD,<br/> Licenziati, Maria Rosaria; Obesity and Endocrine Disease Unit,<br/> Department of Neuroscience, Santobono-Pausilipon Children's Hospital<br/> Faenza, MF; Università degli Studi di Bari Aldo Moro, Department of<br/> Biomedical Sciences and Human Oncology, Pediatrics Unit<br/> Wasniewska, Malgorzata; Department of Human Pathology of Adulthood<br/> and Childhood "G.Barresi", University of Messina<br/> Delvecchio, Maurizio; Metabolic Diseases, Clinical Genetics and<br/> Diabetology Unit, Giovanni XXIII Children's Hospital<br/> Franzese, Adriana; University of Naples Federico II Department of<br/> Translational Medical Sciences<br/> Rutigliano, Irene; Department of Pediatrics, IRCCS Casa Sollievo della<br/> Sofferenza<br/> Fusilli, Paola; UOC Neonatologia, Ospedale "Spirito Santo"<br/> Corica, Domenico; Department of Human Pathology of Adulthood and<br/> Childhood "G.Barresi"<br/> Campana, Giuseppina; Obesity and Endocrine Disease Unit, Department<br/> of Neuroscience, Santobono-Pausilipon Children's Hospital<br/> Greco, Donatella; , OASI Maria SS., Research Institute<br/> Chiarito, Mariangela; Department of Biomedical Sciences and Human<br/> Oncology, University of Bari "A. Moro"<br/> Sacco, Michele; Department of Pediatrics, IRCCS Casa Sollievo della<br/> Sofferenza<br/> Toscano, Silvia; Department of Translational Sciences, University<br/> Federico II<br/> Marini, Maria Giulia; Fondazione ISTUD, Healthcare Area</p> |
| Keywords:                     | <p>QUALITATIVE RESEARCH, Paediatric endocrinology &lt; DIABETES &amp;<br/> ENDOCRINOLOGY, Paediatric clinical genetics &amp; dysmorphology &lt;<br/> GENETICS, Eating disorders &lt; PSYCHIATRY</p>                                                                                                                                                                                                                                                                                                                                                                                                                                                                                                                                                                                                                                                                                                                                                                                                                                                                                                                                                                                                                                                                                                                                                                                                                                                                                                                                                                                                                                                                                                                                                                                                          |
|                               |                                                                                                                                                                                                                                                                                                                                                                                                                                                                                                                                                                                                                                                                                                                                                                                                                                                                                                                                                                                                                                                                                                                                                                                                                                                                                                                                                                                                                                                                                                                                                                                                                                                                                                                                                                                                              |

1  
2  
3  
4  
5  
6  
7  
8  
9  
10  
11  
12  
13  
14  
15  
16  
17  
18  
19  
20  
21  
22  
23  
24  
25  
26  
27  
28  
29  
30  
31  
32  
33  
34  
35  
36  
37  
38  
39  
40  
41  
42  
43  
44  
45  
46  
47  
48  
49  
50  
51  
52  
53  
54  
55  
56  
57  
58  
59  
60

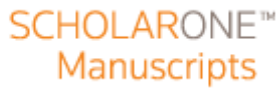

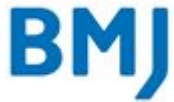

I, the Submitting Author has the right to grant and does grant on behalf of all authors of the Work (as defined in the below author licence), an exclusive licence and/or a non-exclusive licence for contributions from authors who are: i) UK Crown employees; ii) where BMJ has agreed a CC-BY licence shall apply, and/or iii) in accordance with the terms applicable for US Federal Government officers or employees acting as part of their official duties; on a worldwide, perpetual, irrevocable, royalty-free basis to BMJ Publishing Group Ltd ("BMJ") its licensees and where the relevant Journal is co-owned by BMJ to the co-owners of the Journal, to publish the Work in this journal and any other BMJ products and to exploit all rights, as set out in our [licence](#).

The Submitting Author accepts and understands that any supply made under these terms is made by BMJ to the Submitting Author unless you are acting as an employee on behalf of your employer or a postgraduate student of an affiliated institution which is paying any applicable article publishing charge ("APC") for Open Access articles. Where the Submitting Author wishes to make the Work available on an Open Access basis (and intends to pay the relevant APC), the terms of reuse of such Open Access shall be governed by a Creative Commons licence – details of these licences and which [Creative Commons](#) licence will apply to this Work are set out in our licence referred to above.

Other than as permitted in any relevant BMJ Author's Self Archiving Policies, I confirm this Work has not been accepted for publication elsewhere, is not being considered for publication elsewhere and does not duplicate material already published. I confirm all authors consent to publication of this Work and authorise the granting of this licence.

1  
2  
3  
4 1 **Caring and living with Prader-Willi syndrome: integrating children's,**  
5  
6  
7 2 **adults', and parents' experiences through Narrative Medicine**

8  
9  
10 3 Letizia Ragusa<sup>1</sup>, Antonino Crinò<sup>2</sup>, Graziano Grugni<sup>3</sup>, Luigi Reale<sup>4</sup>, Alessandra Fiorencis<sup>4</sup>, Maria  
11  
12 4 Rosaria Licenziati<sup>5</sup>, Maria Felicia Faienza<sup>6</sup>, Malgorzata Wasniewska<sup>7</sup>, Maurizio Delvecchio<sup>8</sup>, Adriana  
13  
14 5 Franzese<sup>9</sup>, Irene Rutigliano<sup>10</sup>, Paola Fusilli<sup>11</sup>, Domenico Corica<sup>7</sup>, Giuseppina Campana<sup>5</sup>, Donatella  
15  
16 6 Greco<sup>1</sup>, Mariangela Chiarito<sup>6</sup>, Michele Sacco<sup>10</sup>, Silvia Toscano<sup>9</sup>, Maria Giulia Marini<sup>4</sup>

17  
18  
19 7 <sup>1</sup> OASI Maria SS., Research Institute, Troina (Enna), Italy.

20  
21 8 <sup>2</sup> Bambino Gesù Paediatric Hospital, Research Institute, Palidoro (Rome), Italy.

22  
23 9 <sup>3</sup> Istituto Auxologico Italiano, Research Institute, Piancavallo (Oggebbio, Verbania), Italy.

24  
25 10 <sup>4</sup> ISTUD Foundation, Healthcare Area, Baveno (Verbania), Italy.

26  
27 11 <sup>5</sup> Obesity and Endocrine Disease Unit, Department of Neuroscience, Santobono-Pausilipon Children's Hospital, Naples,  
28  
29 12 Italy.

30  
31 13 <sup>6</sup> Department of Biomedical Sciences and Human Oncology, University of Bari "A. Moro", Bari. Italy.

32  
33 14 <sup>7</sup> Department of Human Pathology of Adulthood and Childhood "G. Barresi", University of Messina, Italy.

34  
35 15 <sup>8</sup> Metabolic Diseases, Clinical Genetics and Diabetology Unit, Giovanni XXIII Children's Hospital, Bari, Italy.

36  
37 16 <sup>9</sup> University Federico II, Department of Translational Sciences, Naples, Italy.

38  
39 17 <sup>10</sup> Department of Pediatrics, Casa Sollievo della Sofferenza Research Institute, San Giovanni Rotondo (Foggia), Italy.

40  
41 18 <sup>11</sup> Neonatology Unit, Spirito Santo Hospital, Pescara, Italy.

42  
43  
44 19  
45  
46 20 \* Corresponding author: Alessandra Fiorencis, ISTUD Foundation, Strada Nazionale del Sempione  
47  
48 21 Oltrefiume 25, 28831 Baveno (VB), Italy, Tel. +39 0323 933 801, Mobile +39 3420499824, Fax 0323  
49  
50 22 933805, e-mail: [afiorencis@istud.it](mailto:afiorencis@istud.it).

51  
52  
53 23  
54  
55 24 **Word count:** 2865

56  
57  
58 25 **Keywords:** qualitative research, paediatric endocrinology, paediatric genetics and dysmorphology,  
59  
60 26 eating disorders

## 27 **Abstract**

28 **Objectives.** Prader-Willi syndrome (PWS) significantly impacts Health-Related Quality of Life  
29 (HRQOL). However, its relational and existential aspects remain unknown in Italian clinical and social  
30 debate. The project aimed to investigate the PWS impact on HRQOL through Narrative Medicine  
31 (NM) to understand experiences, needs and resources of PWS patients and their caregivers, and to  
32 furnish insights for professionals' daily practice.

33 **Design and setting.** The project involved ten medical centres of the Italian Network for Rare  
34 Diseases and PWS Family Associations and was addressed to PWS underaged and adult patients and  
35 their caregivers. Written interviews, composed by a sociodemographic survey and a narrative, were  
36 collected through the project's website. Three dedicated illness plots structured narratives to  
37 encourage reflection, employing evocative and open words to facilitate individual expression.  
38 Narratives were analysed through NVivo software. Researchers shared the results in a validation  
39 meeting with the project's Steering Committee.

40 **Participants.** Twenty-one children and adolescents and 34 adults with PWS joined the project, as  
41 well as 138 caregivers. A PWS diagnosis or the caregiving of a PWS patient older than five years  
42 represented the eligibility criteria, as well as the willingness to share illness experience by writing  
43 and the ability to communicate into Italian.

44 **Results.** The narrative analysis led to understand PWS social and relational issues, concerning:  
45 diagnosis and current management; PWS daily experience and social context; PWS implications in  
46 the working sphere and participants' future perspectives. Narratives showed that PWS management  
47 crucially impacts on relationships and work-life balance, also revealing that social stigma is still  
48 present.

49 **Conclusion.** The project represented the first effort to investigate PWS impact on HRQOL in Italy  
50 through NM, simultaneously considering the perspectives of PWS patients and their caregivers.

1  
2  
3 51 Findings indicated that a multi-professional approach is fundamental to ensure adequate treatment  
4  
5  
6 52 and provided elements for its improvement.  
7

## 8 53 **Article summary**

### 10 54 **Strengths and limitations of this study**

- 13 55 • Inclusion of PWS patients' perspective within the project
- 15  
16 56 • Narrative Medicine approach
- 17  
18 57 • The participants did not equally represent Italian different geographical areas
- 19  
20  
21 58 • Among PWS patients, researchers included only those able to write
- 22  
23 59

## 26 60 **INTRODUCTION**

28 61 Prader-Willi Syndrome (PWS) is a rare genetic condition caused by an absence of functioning  
29  
30 62 paternal genes on chromosome 15 in the 15q11-q13 region:[1] about 65-70% of the cases are due  
31  
32  
33 63 to the deletion of this region, 20-30% are caused by a maternal uniparental disomy (UPD) of  
34  
35 64 chromosome 15, and most of the remaining 2-5% have an imprinting centre defect or unbalanced  
36  
37  
38 65 translocations (~1%).[2] PWS occurs approximately in 1 in 10,000 to 30,000 births,[3] affecting both  
39  
40 66 sexes and all geographic areas.[4]

42  
43 67 Neonatal hypotonia, poor sucking and feeding difficulties characterise PWS in early infancy;  
44  
45 68 dysmorphic signs (mild craniofacial abnormalities, small hands and foot, kyphoscoliosis), multiple  
46  
47  
48 69 endocrine abnormalities (GH/IGF-I axis dysfunction, hypogonadism, central hypothyroidism and  
49  
50 70 central adrenal insufficiency) and developmental delay constitute other cardinal features of the  
51  
52  
53 71 syndrome.[5-7] Learning disabilities, maladaptive behaviours, and hyperphagia – leading to life-  
54  
55 72 threatening obesity if uncontrolled – follow in childhood and adulthood.[3, 8] The mortality rate of  
56  
57  
58 73 PWS patients is higher than in the general population,[9] with a 3% annual death rate across all  
59  
60 74 ages.

1  
2  
3 75 Behavioural issues are noticeable in PWS, including aggressive and obsessive-compulsive  
4  
5 76 behaviours and skin picking,[10, 11] and patients present a higher risk to develop psychiatric illness  
6  
7  
8 77 reaching adulthood;[12] food-seeking behaviours are particularly complex,[13] significantly  
9  
10 78 impacting patients' and caregivers' Health-Related Quality of Life (HRQOL). In particular, PWS  
11  
12  
13 79 caregivers – when compared to other families facing children's disability or complex condition –  
14  
15 80 report a higher level of stress, more difficulties in coping with symptoms,[14] a higher caregiving  
16  
17  
18 81 burden,[15] and a lower HRQOL.[16]

19  
20 82 The clinical picture of PWS patients substantially differs during the life span,[3, 6] while the  
21  
22  
23 83 prognosis is significantly conditioned by proactive interventions to prevent morbid weight excess.[9]

24  
25 84 There is currently no healing treatment for PWS. However, early diagnosis combined with  
26  
27  
28 85 multidisciplinary care favourably influences PWS course:[17] consequently, the diagnosis should be  
29  
30 86 confirmed very early during the neonatal period,[18] also thanks to genetic testing  
31  
32  
33 87 development.[19] In this context, early growth hormone (GH) treatment has beneficial outcomes  
34  
35 88 on height, body composition, endurance, and sense of well-being among others;[20-22]  
36  
37  
38 89 furthermore, early treatment with recombinant GH positively impact on PWS[23] patients' and  
39  
40 90 caregivers' HRQOL.[24, 25]

41  
42 91 PWS social, relational, emotional and existential aspects remain profoundly unknown with a poor  
43  
44  
45 92 debate within Italian clinical and social communities: World Health Organization (WHO) has stressed  
46  
47 93 the importance of HRQOL research in leading clinical and social practice, also recommending using  
48  
49  
50 94 narrative research.[26]

51  
52 95 The discipline of Narrative Medicine (NM), based on illness narratives,[27] pursues to integrate the  
53  
54 96 disease-centred approach, concerning clinical aspects, with the illness-centred and sickness-centred  
55  
56  
57 97 approaches, respectively focusing on the individual experience and the social understanding of a  
58  
59 98 specific condition[28] and both often neglected by the scientific community. NM areas of  
60



1  
2  
3 99 application range from the clinical practice to the therapeutic path design, education, and  
4  
5  
6 100 research.[29] In research, narratives show possible interventions on a specific condition through the  
7  
8 101 integration of all perspectives involved in the pathway of care.[30, 31] Combining Evidence-Based  
9  
10  
11 102 Medicine (EBM) and NM provides clinicians methods to strengthen clinical practices with narrative  
12  
13 103 competences.[29]  
14  
15 104 NM research addresses the individual experience when coping with distress caused by clinical  
16  
17  
18 105 conditions: it allows to understand profound experiences, needs and values of all actors involved in  
19  
20 106 the care pathway.[27, 32] Scientific societies, healthcare facilities, and patients associations have  
21  
22  
23 107 increasingly employed results deriving from NM research to improve the organisation and efficacy  
24  
25 108 of healthcare services and generating sustainability.[26] Moreover, efficacy becomes quality of care  
26  
27  
28 109 for patients and their social and relational contexts.[27]

29  
30 110 The NM project “PRAXIS: Prader-Willi Excellence in Care with Story Taking” aimed to investigate the  
31  
32  
33 111 PWS impact on HRQOL, employing narrative analysis (a) to understand the experience, real needs  
34  
35 112 and personal resources of people with PWS and their family caregivers from diagnosis to current  
36  
37  
38 113 management, and (b) to furnish insights to help professionals to use NM findings in daily practice  
39  
40 114 within a multidisciplinary and multi-professional approach.[17]

## 41 42 115 **METHODS**

### 43 44 45 116 **Patient and public involvement**

46  
47 117 The project was conducted in Italy between October 2018 and July 2019, as a part of broader  
48  
49  
50 118 research addressed, on the one hand, to people with PWS and their caregivers, and on the other  
51  
52 119 hand, to professionals working with PWS. Professionals underwent a webinar conducted by  
53  
54  
55 120 researchers from ISTUD Foundation to be trained in NM; parallel chart[27, 33] was identified as the  
56  
57 121 most suitable NM tool to collect their narratives since it represents a room in which professionals  
58  
59 122 can write their impressions in plain language as a supplement to technical and quantitative  
60

1  
2  
3  
4  
5  
6  
7  
8  
9  
10  
11  
12  
13  
14  
15  
16  
17  
18  
19  
20  
21  
22  
23  
24  
25  
26  
27  
28  
29  
30  
31  
32  
33  
34  
35  
36  
37  
38  
39  
40  
41  
42  
43  
44  
45  
46  
47  
48  
49  
50  
51  
52  
53  
54  
55  
56  
57  
58  
59  
60

123 reports.[27, 30, 33] Caregivers were informed about NM through three seminars – organised by the  
124 Prader-Willi Federation and the Prader-Willi Association of Lazio Region – in Lombardy, Lazio, and  
125 Sicily Regions. Participants with PWS were given the possibility to express by drawing if unable to  
126 write; however, some participants decided to maintain both the opportunities of expression.

127 Participants were recruited involving ten medical centres for paediatric and adult patients of the  
128 Italian Network for Rare Diseases (Supplement 1) distributed between different geographical areas  
129 (North, Centre and South Italy), the Italian Prader-Willi Federation, and the Prader-Willi Association  
130 of Lazio Region. A PWS diagnosis and the caregiving of a person older than five years with PWS  
131 represented the eligibility criteria, as well as the willingness to share illness experience by writing;  
132 thus, the ability to communicate into Italian was indispensable for the inclusion in the project.

133 Participants were informed on the possibility to view the project’s results once shared (into Italian)  
134 on the project’s webpage [www.medicinanarrativa.eu/praxis](http://www.medicinanarrativa.eu/praxis).

### 135 **Data collection**

136 Written stories of experiences were collected through the project’s webpage; after that, raw and  
137 anonymous narratives were downloaded as a Microsoft Excel spreadsheet. A sociodemographic  
138 survey and an illness plot[27] constituted the written narrative, specifically designed for three  
139 different groups (Supplement 2): underaged and adult patients with PWS, and caregivers.

140 The three illness plots addressed common aspects: (a) diagnosis and current management of the  
141 condition, particularly focusing on strategies to food behaviours; (b) the daily living with PWS,  
142 concerning the relational sphere and social context; (c) the work experience and future  
143 perspectives. The plots guided narratives in a chronological order to identify evolutions over time.

144 Evocative and open words were used to facilitate individual expression.[34]

145 The research tools were drawn up by a Steering Committee involving three endocrinologists,  
146 respectively from the Oasi Maria SS. Research Institute (Troina, Italy), the Bambino Gesù Paediatric

1  
2  
3 147 Hospital of Palidoro (Rome, Italy), and the Istituto Auxologico Italiano of Piancavallo (Oggebbio,  
4  
5  
6 148 Italy), and the researchers of ISTUD Foundation.

### 8 149 **Ethical considerations**

9  
10  
11 150 The project was performed according to the principles of the Declaration of Helsinki. Before their  
12  
13 151 involvement, participants provided written informed consent after being briefed on the project's  
14  
15 152 purpose and data confidential handling, according to the Italian Law on Privacy and the Safeguarding  
16  
17  
18 153 of Sensitive Data (D.Lgs n. 196/2003). Written informed consent to participate was obtained from  
19  
20 154 parents or tutors for underaged participants, and from adult participants or their guardians, when  
21  
22  
23 155 appropriate.

24  
25 156 The Ethical Committee of the Oasi Maria SS. Research Institute (Troina, Italy) approved the project  
26  
27  
28 157 in January 2019.

### 30 158 **Analysis**

31  
32  
33 159 We analysed the sociodemographic survey through descriptive statistics. No question was  
34  
35 160 mandatory; we excluded non-responses from the statistical representation.

36  
37 161 Anonymous narratives were entered into NVivo software[35] for coding and analysis. Researchers  
38  
39  
40 162 from ISTUD Foundation collectively coded ten narratives to assess consistency across team  
41  
42 163 members. Afterwards, each narrative was coded separately and then reviewed during meetings to  
43  
44  
45 164 reduce bias in the interpretation of texts. Open interpretive coding was employed to identify and  
46  
47 165 analyse any emerging topics; Kleinman's[28] theoretical framework was applied to narrative  
48  
49  
50 166 analysis to reveal illness- and sickness-related aspects in narratives, respectively concerning the  
51  
52 167 personal and emotional experience of a condition and how is it perceived within the society.

53  
54 168 Researchers shared the results in a validation meeting with the Steering Committee of the project.

55  
56  
57 169 All researchers use the SRQR Reporting Guidelines.[36]

### 59 170 **RESULTS**

60

## 171 Sociodemographic aspects

172 Twenty-one children and adolescents and 34 adults with PWS joined the project, as well as 138  
 173 caregivers. Table 1 summarises sociodemographic data of these three different groups.

**Table 1 – Sociodemographic data of participants**

|                                                 | Minors with PWS<br>(N = 21) | Adults with PWS<br>(N = 34) | PWS caregivers<br>(N = 138) |
|-------------------------------------------------|-----------------------------|-----------------------------|-----------------------------|
| <b>Gender</b>                                   |                             |                             |                             |
| Females                                         | 6 (29%)                     | 19 (56%)                    | 99 (72%)                    |
| Males                                           | 15 (71%)                    | 15 (44%)                    | 37 (27%)                    |
| <b>Average age (yrs)</b>                        |                             |                             |                             |
|                                                 | 14 (7-18)                   | 29 (19-48)                  | 48 (20-61)                  |
| <b>Geographic residence</b>                     |                             |                             |                             |
| Northern Italy                                  | 3 (13%)                     | 19 (58%)                    | 29 (21%)                    |
| Central Italy                                   | 4 (19%)                     | 6 (18%)                     | 40 (29%)                    |
| Southern Italy                                  | 14 (69%)                    | 9 (24%)                     | 69 (50%)                    |
| <b>Education</b>                                |                             |                             |                             |
| Elementary school                               | 21 (100%)                   | 2 (6%)                      | 5 (4%)                      |
| Middle school                                   | //                          | 10 (30%)                    | 19 (14%)                    |
| High school                                     | //                          | 21 (64%)                    | 76 (55%)                    |
| University degree                               | //                          | 1 (1%)                      | 19 (14%)                    |
| <b>Marital status</b>                           |                             |                             |                             |
| Single                                          | 21 (100%)                   | 33 (97%)                    | 3 (2%)                      |
| Married/cohabitant                              | //                          | 1 (3%)                      | 118 (86%)                   |
| Divorced/separated                              | //                          | //                          | 14 (10%)                    |
| Widowed                                         | //                          | //                          | 3 (2%)                      |
| <b>Employment status</b>                        |                             |                             |                             |
| Student                                         | 21 (100%)                   | 4 (11%)                     | 3 (2%)                      |
| Working                                         | //                          | 19 (56%)                    | 94 (68%)                    |
| Not working                                     | //                          | 11 (33%)                    | 38 (28%)                    |
| Retired                                         | //                          | //                          | 3 (2%)                      |
| <i>Data presented as N (%) or mean (range)*</i> |                             |                             |                             |

174

## 175 From diagnosis to the current management of PWS

176 Thirty-six per cent of caregivers reported that their children were diagnosed with PWS within the  
 177 first month of life (Figure 1); however, 10% affirmed that the diagnosis occurred after the child's  
 178 third year of life.

179 In narratives, 95% of caregivers focused on PWS illness- and sickness-related aspects (Table 2), while  
 180 only the remaining 5% adopted a technical and clinical perspective for talking about the  
 181 condition.[28] Disbelief, displacement, anger, and pain represented the most recurrent emotions  
 182 expressed by caregivers, seeking to adapt to the situation and its criticalities. PWS patients – both

183 underaged and adult – described the condition only through its illness- and sickness-related facets,  
 184 while technical and clinical references to PWS remained on the background.

**Table 2 – Illness- and sickness-related aspects in narratives**

|                 | Caregivers                                                                                                                                                                                                                                                                                                                                                                                                                                                                                                                                                                                                                                                                                                                                                                                                                                 | Minors and adults with PWS                                                                                                                                                                                                                                                                                                                                                                                                                                                                                                                                            |
|-----------------|--------------------------------------------------------------------------------------------------------------------------------------------------------------------------------------------------------------------------------------------------------------------------------------------------------------------------------------------------------------------------------------------------------------------------------------------------------------------------------------------------------------------------------------------------------------------------------------------------------------------------------------------------------------------------------------------------------------------------------------------------------------------------------------------------------------------------------------------|-----------------------------------------------------------------------------------------------------------------------------------------------------------------------------------------------------------------------------------------------------------------------------------------------------------------------------------------------------------------------------------------------------------------------------------------------------------------------------------------------------------------------------------------------------------------------|
| <b>Illness</b>  | <p>– It is not easy to live with a child with this syndrome, especially when she asks for food: I tell her, no, and she starts crying and getting upset, screaming and telling me things I do not understand, but I do not give up.</p> <p>– Broken dreams, the feeling that something had changed forever, that my life had changed. Me, so self-confident, so independent, suddenly feeling fragile, scared and alone, dreadfully alone and unable to react.</p> <p>– The first emotion was fear. I did not know how to manage his crises for food. I did not know what was happening to us, and every time we go to do the checks, we reopen the wound, with all its fears.</p> <p>– When my son was born, they immediately told me that something was wrong. It was terrible. I was young, and he was my long-awaited first child.</p> | <p>– I feel proud, disability does not scare me.</p> <p>– Sometimes I feel happy, and sometimes sad because I have this disease.</p> <p>– I feel very happy, sometimes a bit sad for my illness. But I am happy, because the Lord created me and I like me as I came into existence.</p> <p>– I feel a little sad for having this rare disease; there are many difficulties, especially not eating too much.</p>                                                                                                                                                      |
| <b>Sickness</b> | <p>– Concern intensifies, if I think that he will start school in September. I am worried about his level of tolerance, if he will become the object of insults and bullying.</p> <p>– Taking care of a boy with Prader-Willi syndrome means changing the lifestyles of the whole family, trying to combine the needs related to the disease with those of the family. It is a different journey, which could limit life experiences to those who do not have this kind of availability.</p> <p>– If I think of my child and her syndrome, I feel a great sorrow because I do not know if she will ever have a normal life.</p> <p>– We were often desperate, especially when we thought about our son's future. Then we learned to deal with problems as they appeared.</p>                                                               | <p>– Other people are bad. They do not care about me because I have the syndrome.</p> <p>– I do not feel up to the kids of my generation. I hate me, I want to die. Sometimes I would like to be a boy like the others, and always be happy.</p> <p>– Prader-Willi syndrome lasts a lifetime. It is difficult to communicate with others, even with parents in the family.</p> <p>– On the one hand, I feel different from others because I am disabled and hypotonic. On the other hand, I feel like them because I was lucky enough to walk, to see and to hear</p> |

186 As shown in Table 3, focusing on therapeutic paths from caregivers' perspective meant addressing  
 187 (a) relationships with professionals and (b) healthcare structures, both differing in specialisation and  
 188 competence on PWS, and (c) needed or employed treatments, beyond diet.

**Table 3 – PWS caregivers' perspective on therapeutic path**

|                      |                                                                                                                                                                      |
|----------------------|----------------------------------------------------------------------------------------------------------------------------------------------------------------------|
| <b>Professionals</b> | – Thanks to the specialist, we set up an appointment at the hospital, where we are currently being followed. The cases they deal with are many, and for us this is a |
|----------------------|----------------------------------------------------------------------------------------------------------------------------------------------------------------------|

---

1  
2  
3  
4  
5  
6  
7  
8  
9  
10  
11  
12  
13  
14  
15  
16  
17  
18  
19  
20  
21  
22  
23  
24

|                              |                                                                                                                                                                                                                                                                                                                                                                                                                                                                                                                                                                                                                                                                                                                          |
|------------------------------|--------------------------------------------------------------------------------------------------------------------------------------------------------------------------------------------------------------------------------------------------------------------------------------------------------------------------------------------------------------------------------------------------------------------------------------------------------------------------------------------------------------------------------------------------------------------------------------------------------------------------------------------------------------------------------------------------------------------------|
|                              | <p><i>guarantee. At the human level they are unparalleled, available, smiling: all this allows you to spend more peaceful time, without feeling a burden.</i></p> <p><i>– I started attending health workers, support teachers and incapable teachers, unprepared paediatricians, arrogant doctors, medical commissions, courts. I clashed with bureaucracy, absurd health protocols, illogical rules to get what my daughter was entitled to and her psycho-physical well-being.</i></p> <p><i>– I was disappointed by the professionals. They talked about my son and my life as something unmodifiable, fatal, hopeless. I decided to get as far away as possible. My son was not a syndrome, he was a child.</i></p> |
| <b>Healthcare structures</b> | <p><i>– We do not live in a big city, so we had great difficulty getting our daughter to follow suitably.</i></p> <p><i>– At the hospital they showed us the path we should have taken... on a medical level! On a therapeutic level, I had to resort to private professionals and centres.</i></p> <p><i>– Miles of road and hotel rooms distinguish the curative path that weighs on the family, both in economic terms and stress.</i></p>                                                                                                                                                                                                                                                                            |
| <b>Treatments</b>            | <p><i>– This part turned out to be better than expected. The only medicine is GH, which is simple and painless.</i></p> <p><i>– Psychomotricity, GH, speech and music therapy, psychological support and sport.</i></p> <p><i>– During adolescence, we had to resort to psychiatric drugs: this was a defeat for us, but it was necessary, our son had become unmanageable. There is little knowledge of the syndrome by psychiatrists.</i></p>                                                                                                                                                                                                                                                                          |

---

25 189

26  
27 190 From caregivers' narratives, food-seeking behaviours[13] emerged as the most challenging within  
28  
29 the domestic context. Caregivers were aware that feeding is the first treatment for people with PWS  
30 191  
31 and sought strategies to face them. The 50% declared to have found a balance, while the other 50%  
32 192  
33 still reported a problematic relationship with the food issue. Both underaged and adult participants  
34 193  
35 with PWS showed to be aware of the importance of following a diet: whether positive or negative  
36  
37 194 relationships with food emerged from narratives, where (a) the positive ones also represented the  
38  
39 195 result of commitment and several strategies to manage food-seeking behaviours, and (b) food-  
40  
41 seeking turned out to be related to emotions (e.g. anger). Table 4 shows the main elements  
42 196  
43 emerged from caregivers' and PWS participants' narratives.  
44 197  
45  
46  
47 198

48  
49 **Table 4 – Relationships with food-seeking behaviours in narratives**

|                   | Caregivers                                                                                                                                                                                                                                                                                                                                                                                                                                                                                                                                      | Minors and adults with PWS                                                                                                                                                                                                                                                                                             |
|-------------------|-------------------------------------------------------------------------------------------------------------------------------------------------------------------------------------------------------------------------------------------------------------------------------------------------------------------------------------------------------------------------------------------------------------------------------------------------------------------------------------------------------------------------------------------------|------------------------------------------------------------------------------------------------------------------------------------------------------------------------------------------------------------------------------------------------------------------------------------------------------------------------|
| <b>Commitment</b> | <p><i>– The first thing I did was going to visit a professor in Switzerland to find a diet as clean as possible that could give strength and good energy to my child. I decided to follow it too.</i></p> <p><i>– We started to have a different relationship with food, with more awareness of what we could and could not eat.</i></p> <p><i>– We tried to get the whole family accustomed to healthy eating as much as possible. I teach my son to read nutrition labels so he can choose the best one day. He already knows that he</i></p> | <p><i>– I have a good relationship with food, I can control myself, I eat legumes and soups, and pasta in the evening. I really like vegetables.</i></p> <p><i>– I follow a correct diet and I never steal food. If someone offers me something, I can refuse.</i></p> <p><i>– I follow a nutritionist's diet.</i></p> |

---

1  
2  
3  
4  
5  
6  
7  
8  
9  
10  
11  
12  
13  
14  
15  
16  
17  
18  
19  
20  
21  
22  
23  
24  
25  
26  
27  
28  
29  
30  
31  
32  
33  
34  
35  
36  
37  
38  
39  
40  
41  
42  
43  
44  
45  
46  
47  
48  
49  
50  
51  
52  
53  
54  
55  
56  
57  
58  
59  
60

---

*must not eat excessive sugar and fat; eat at precise times, but managing hunger is not easy.*

---

**Strategies**

*– We have almost always managed to keep it under control; we focused a lot on food education (salads, vegetables, no snacks). We gave her the possibility to choose from certain foods and she was therefore more satisfied, allowing us to eat differently.*

*– Food is the main problem for my child but there are both positive and negative moments. So, we are tough if we need to be tough, but sometimes we make some exceptions.*

*– Food is always in our mind, but we try to manage everything at the best. We try to live a life as normal as possible, and we try not to upset his habits too much. We give him some extras (he goes to parties, he goes out with some friends, he goes to eat pizza).*

*– I like to eat everything. I try to eat lots of vegetables, even if this doesn't fill me, and whole wheat pasta. When I play or do puzzle, I don't think about hunger. Mom tells me that if I want to eat more, I have to do more movement.*

*– I try to organise my day according to fixed patterns, and I know I can eat at certain times.*

*– In order not to think about food, I go for long walks, I do crossword puzzles and puzzles, I play tablet and computer.*

**Criticalities**

*– Unfortunately, food is an obsession and difficult to manage. Many times, I found my little child with hidden food.*

*– The food issue becomes a daily challenge. Lunches and dinners are no longer quiet, and you live very anxiously. The kitchen is no longer a meeting place.*

*– It is our conviction, a continuous struggle, day and night, the monster we have to defeat.*

*– I eat out of meal because I hate me. I do not want others, and I am hungry because my parents do not give me the right portions, and then I get fat and hospitalised, I steal food and go to the bar because I am for hungry. I did not eat as indicated by the diet.*

*– It is a pain to see the others eating.*

*– When I think of food, my eyes shine and when I see something to eat, I want it at all costs, and I cannot stop myself. I am always hungry, and I never get enough; when I eat too much, I feel sick. When they tell me that I cannot eat much, I get angry and nervous.*

---

**Living with PWS in relationships and social context**

Thirty-six per cent of PWS caregivers described daily life at home as quiet; however, most of them (64%) reported: fatigue (21%), chaos (6%), all-encompassing assistance (20%), and tested routines to better manage food-seeking behaviours (17%). They try to maintain hobbies, interests and outside activities, even with their sons/daughters with PWS (Table 5). Relationships external to the family are hard to be preserved, imposing a radical change in social life. Indoor and outdoor activities represented an essential tool for caregivers in managing both emotion patterns and food-seeking behaviours: narratives showed that both underaged and adult participants with PWS were aware of that. Sports, mind activities games, gardening and pet therapy were some of the most helpful activities reported; furthermore, PWS patients appeared as dedicated to cleanliness and

210 routine activities. Both relational and activity spheres reported the influence of behavioural and  
 211 emotional changes in daily life and familiar and social context; moreover, narratives addressed the  
 212 strong presence of caregivers, as well as situations of social inclusion or exclusion.

**Table 5 – Activities and relationships in narratives**

|                           | Caregivers                                                                                                                                                                                                                                                                                                                                                                                                                                                                                                                                                                                                | Minors and adults with PWS                                                                                                                                                                                                                                                                                                                                                                                                                                                                                                                                                                                                                                                                                                                                                                                                          |
|---------------------------|-----------------------------------------------------------------------------------------------------------------------------------------------------------------------------------------------------------------------------------------------------------------------------------------------------------------------------------------------------------------------------------------------------------------------------------------------------------------------------------------------------------------------------------------------------------------------------------------------------------|-------------------------------------------------------------------------------------------------------------------------------------------------------------------------------------------------------------------------------------------------------------------------------------------------------------------------------------------------------------------------------------------------------------------------------------------------------------------------------------------------------------------------------------------------------------------------------------------------------------------------------------------------------------------------------------------------------------------------------------------------------------------------------------------------------------------------------------|
| <b>Indoor activities</b>  | <p>– I like talking to my daughter, finding out what she likes to do and meeting her demands. I like to see her play with her friends and laugh, because she is very nice and charismatic.</p> <p>– I like being with my family; I'm a full-time mom. I would like to go to the gym and to be a woman like many others, but I do not have time.</p> <p>– In my spare time I am a musician.</p>                                                                                                                                                                                                            | <p>– I like reading fairy tales and colouring.</p> <p>– Mom does not want me to go to the kitchen; I do puzzles or embroidery; I see Walt Disney cartoons. I read the newspapers. When I am sad or angry, I try to eat. Often, I quarrel with my mom. My dad says nothing because he makes me feel angrier.</p> <p>– I see the television, I hear the music, and I pray everyday. Every morning I make the beds and I lay the table while my parents are cooking.</p>                                                                                                                                                                                                                                                                                                                                                               |
| <b>Outdoor activities</b> | <p>– I reload being alone. I do yoga, I study Japanese, I sing in a choir. I do not leave my passions.</p> <p>– I like to spend my family life. I cultivate my hobbies thanks to my wife's patience. With her I share the passion for concerts and cinema. I also cultivate my personal passions: wine and the collection of stickers.</p> <p>– I would like to swim, to go for walks by the sea and the lake. I would like to have no responsibilities, schedules, limitations; I would like a little carefree.</p>                                                                                      | <p>– I play sports, especially football and swimming. I go for walks in company, alone or with my dog. I like going to see my favourite football team at the stadium. I play videogames and watch movies. I like going to see my favourite animal, the dolphin, at the dolphinarium.</p> <p>– I have so many hobbies: dancing, singing, painting. I like to do artistic activities, I like going to the cinema and to the theatre, I like reading crime novels, and I really like being with others and playing cards when the people around me do not fool me.</p> <p>– I like going out, shopping, swimming, listening to music, drawing, cutting and pasting, sticking figurines, making decoupage.</p>                                                                                                                          |
| <b>Relationships</b>      | <p>– Some people have tried to understand the condition, others have disappeared. In this case, the syndrome helped me make selection among the people around me.</p> <p>– My father and my mother were as sorry as me and incredulous, unable to get over it. My sister and friends have been my support. My husband has shut himself up, present and absent at the same time, except for practical things.</p> <p>– The grandparents have been fantastic, available, always ready to help us. Friends did not understand our situation, and our roads soon split up: social life changes radically.</p> | <p>– My parents are the closest and most precious people. They are strict, but affectionate and loving. I am morbid with them and I always look for contact even if I make them angry. My brothers are also close to me. One is playful and the other protective, a little severe. With them I am serene and protective towards them.</p> <p>– At school I try to get close to the others, but they run away, they do not want me. Professors love me, even with some of them I feel I am different and not good. My parents: my biological mother did not love me, and my father hated me, my other parents love me so much.</p> <p>– The people next to me are my parents and my sister, and my personal support teachers. I do not like all my educators and my classmates because they spite me, but some of them are good.</p> |

214 **Work and future perspectives**



1  
2  
3 215 Sixty-two per cent of family caregivers had to change their job after the birth of their child with PWS  
4  
5  
6 216 (Table 6): more than a third left their current work, 8% changed job to assist the child, another 8%  
7  
8 217 requested for a part-time job, and 3% abandoned the perspective of a career. From a gender point  
9  
10  
11 218 of view, 63% of female (mothers) and 33% of male caregivers had to change their current job to  
12  
13 219 adapt to the child's condition. Forty-six per cent did not talk about PWS in the workplace or did it  
14  
15 220 just with their closest colleagues; 36% reported comprehensive behaviours, while 18% declared a  
16  
17  
18 221 lower understanding for PWS management necessities than for other diseases, such as cancer. From  
19  
20 222 narratives, work also emerged as a positive personal resource. Fifty-six per cent of adults with PWS  
21  
22  
23 223 declared to have a job, mainly characterised by low complexity and repetitive operations and carried  
24  
25 224 out in social cooperatives or centres, small companies with high corporate social responsibility, and  
26  
27  
28 225 family companies. Work is a source of pride and well-being and a distraction from food, but episodes  
29  
30 226 of irritability and aggressive behaviours are also reported.

**Table 6 – PWS and the working sphere in narratives**

|                        |                                                                                                                                                                                                                                                                                                                                                                                                                                                                                                                                                                                                                                                                                                                                                                                                                                                                                                                                                                                                         |
|------------------------|---------------------------------------------------------------------------------------------------------------------------------------------------------------------------------------------------------------------------------------------------------------------------------------------------------------------------------------------------------------------------------------------------------------------------------------------------------------------------------------------------------------------------------------------------------------------------------------------------------------------------------------------------------------------------------------------------------------------------------------------------------------------------------------------------------------------------------------------------------------------------------------------------------------------------------------------------------------------------------------------------------|
| <b>Adults with PWS</b> | <p><i>– I am very happy because my colleagues are very good and they care about me, they are very close to me. I am happy because I like my job.</i></p> <p><i>– I deal with the press review, I answer by phone, I receive the people who come, and I do other jobs that the office managers assign me. If I am happy and motivated, I do not go looking for food. Only if I am nervous, I look for food. Now I have made so much progress and therefore I have done less.</i></p> <p><i>– I often have nervous attacks and I answer badly, offending with swear words those who make fun of me on how I do my job.</i></p> <p><i>– I work in a nursing home five days a week. I wash laundry, iron and fold the clothes of the guests. With me works a girl who follows me and teaches me many things. Every day I have a different person, it depends on the shifts. With them I feel good because they treat me like a normal person, and they congratulate me every time I work with them.</i></p> |
| <b>PWS caregivers</b>  | <p><i>– I had the support and closeness of my colleagues, who gave me the priority for any personal needs, so to allow me to not leave my son and my wife alone. They were like a second family to me, they all contributed as much as they could.</i></p> <p><i>– I had to leave work. I worked at the factory eight hours and it was not possible to ask for a part-time job.</i></p> <p><i>– The job was a safety valve, a place to have a normal life.</i></p> <p><i>– At work, at first there were no changes, because I did not immediately say what had happened. I talked about it with a few trusted colleagues, who showed me great affection and solidarity.</i></p>                                                                                                                                                                                                                                                                                                                         |

56 227  
57  
58 228 As for future perspectives, PWS family caregivers declared to hope to be present for a long time for  
59  
60 229 their sons and daughters and to be particularly concerned about what will happen to them without

230 familiar support (Table 7). Caregivers also addressed social inclusion issues – such as social changes  
 231 and openness – rather than clinical solutions to PWS. Adult participants with PWS showed a self-  
 232 realisation perspective through work (27%) – as underaged participants do – and the desire to have  
 233 a family (46%), as well as to recover from PWS (10%) and generally to live well (14%).

**Table 7 – Future perspectives on living with PWS in narratives**

|                        |                                                                                                                                                                                                                                                                                                                                                                                                                                                                                                                                                                                                                                                                                                                                                                                                                                                                                                                                                                     |
|------------------------|---------------------------------------------------------------------------------------------------------------------------------------------------------------------------------------------------------------------------------------------------------------------------------------------------------------------------------------------------------------------------------------------------------------------------------------------------------------------------------------------------------------------------------------------------------------------------------------------------------------------------------------------------------------------------------------------------------------------------------------------------------------------------------------------------------------------------------------------------------------------------------------------------------------------------------------------------------------------|
| <b>Minors with PWS</b> | <ul style="list-style-type: none"> <li>– <i>When I grow up, I want to be a professor of endocrinology and study my syndrome.</i></li> <li>– <i>I would like to be a vet because I love animals.</i></li> <li>– <i>I would like to drive an ambulance and do a lot of jobs.</i></li> </ul>                                                                                                                                                                                                                                                                                                                                                                                                                                                                                                                                                                                                                                                                           |
| <b>Adults with PWS</b> | <ul style="list-style-type: none"> <li>– <i>I would like to start a family by adopting a child, because I have so much love to give, and being with my boyfriend. I hope to work in the same place. I do not know how to live without my parents, they help us a lot.</i></li> <li>– <i>I would like to go living with the person I love the most in the world, having children and, above all, becoming a famous singer, and knowing all my favourite singers. I would like to get married and go to live in a nice house with a pool.</i></li> <li>– <i>I hope that medicine will be able to find a drug that helps to limit nervous hunger and increase satiety, which unfortunately increases with the syndrome. Some moments are difficult to overcome. I hope to live as best as possible with the consequences of the syndrome, and I hope that doctors will find treatments to alleviate the risks. I hope that others can also live better.</i></li> </ul> |
| <b>PWS caregivers</b>  | <ul style="list-style-type: none"> <li>– <i>Surely his future will be full of satisfactions. We are working to ensure a positive future for him and a job that makes him happy and confident in his possibilities.</i></li> <li>– <i>I believe the future will be difficult; I hope to be wrong, but I realised that most people just keep thinking about their needs. It is certainly difficult and challenging to care for or stay close to people with pathologies of this kind, but perhaps if everyone did their own and committed themselves more to the social, the future could be different. We should learn from an early age that we need to help others and be at the side of those in need.</i></li> <li>– <i>As long as we, her family, are there, I think the future is “protected”. The “after” is fearful, but I know I have to do something for her ... I owe her!</i></li> </ul>                                                                 |

234

## 235 DISCUSSION

236 The PRAXIS project represents the first effort to investigate PWS impact on HRQOL in Italy through  
 237 NM, simultaneously considering the perspectives of underaged and adult patients with PWS and  
 238 their caregivers. The project firstly aimed to understand their experience, real needs and personal  
 239 resources. Fifty-five between children, adolescents, and adults with PWS reported joy and pride in  
 240 sharing their stories, also suggesting that using evocative and open words[34] in structuring illness  
 241 plots can be crucial to help people to express themselves. Moreover, the collection of 138 caregiving  
 242 stories suggested a strong dedication to the survey and the need for caregivers to be listened to:  
 243 they described writing as liberating, demonstrating its potentiality (a) to have a therapeutic

1  
2  
3 244 effect[27, 33] and (b) to be a safe room from the attitude of passing,[37] that is handling information  
4  
5  
6 245 considered discrediting or critical for the self to avoid social stigma.  
7  
8 246 Talking about PWS, indeed, still emerged as a “taboo”. As shown in illness- and sickness-centred  
9  
10  
11 247 narratives [28], caregivers encountered significant difficulties in socialising the challenges PWS  
12  
13 248 imposes in daily life, as well as the pain of having a child “different” from social imaginary: we may  
14  
15 249 identify this as a social pain, also concerning caregivers in carrying on familiar criticalities.  
16  
17  
18 250 Furthermore, caregivers considered the project as a chance to invite society to integrate people  
19  
20 251 with PWS and to denounce the stigma[37] still surrounding them.  
21  
22  
23 252 If literature shows the cognitive impairment of people with PWS,[6] we would like to enrich  
24  
25 253 evidences by suggesting to consider the multiple intelligences[38] these people show in their  
26  
27  
28 254 everyday experience. In line with Gardner’s[38] reflection, revealing alternatives to the standard  
29  
30 255 forms of intelligence (the logical-mathematical and linguistic ones), narratives showed the constant  
31  
32  
33 256 use of visuo-spatial, musical, interpersonal, existential, and introspective talents, resources and  
34  
35 257 capabilities. In this regard, it has been reported that PWS patients show above the average  
36  
37  
38 258 performance in several tasks implying visuo-spatial skills,[39] which are linked with higher math  
39  
40 259 abilities.[40] In particular, the importance of multiple intelligences emerged in food- control  
41  
42 260 strategies and activities, consequently suggesting that considering them may positively influence  
43  
44  
45 261 overall HRQOL.  
46  
47 262 Considering the second purpose of the project, specific elements emerged from the analysis of  
48  
49  
50 263 therapeutic paths. PWS diagnosis mostly occurred up to the child’s second year of life, but in some  
51  
52 264 cases, a significant delay is still present, particularly for those people living away from specialised  
53  
54  
55 265 centres. Since timing is essential in PWS treatment,[9] training for neonatologists, geneticists and  
56  
57 266 general paediatricians on PWS might improve early diagnosis. Moreover, other professionals  
58  
59  
60

1  
2  
3  
4  
5  
6  
7  
8  
9  
10  
11  
12  
13  
14  
15  
16  
17  
18  
19  
20  
21  
22  
23  
24  
25  
26  
27  
28  
29  
30  
31  
32  
33  
34  
35  
36  
37  
38  
39  
40  
41  
42  
43  
44  
45  
46  
47  
48  
49  
50  
51  
52  
53  
54  
55  
56  
57  
58  
59  
60

267 involved also need to develop or strengthen specific competencies on PWS to be able to address  
268 this condition.

269 Narratives showed some peculiar clinical PWS characteristics, such as irritability, aggressive and  
270 obsessive-compulsive[10, 11] and food-seeking[13] behaviours. The last resulted in the most  
271 challenging for both people with PWS and their caregivers: food management strategies,[41] as well  
272 as indoor and outdoor activities[42] and school or work schedules,[43, 44] can help people with  
273 PWS and caregivers to improve the relationship with food and within the family, consequently  
274 enhancing overall HRQOL.

275 Diet management and strategies, early GH therapy, clinical and psychiatric treatments, activities in  
276 specialised or social centres, and the different professional roles involved showed that a multi-  
277 professional approach integrating hospital and territory is fundamental to ensure adequate  
278 treatment of PWS,[17, 43, 45] as well as to mitigate the burden of caregiving reported both in  
279 narratives and literature.[14-16] In particular, two related topics emerged: (a) mostly women  
280 (mothers) changed or retired from work to caregiving; (b) family caregivers stated to be concerned  
281 on what will happen to their sons and daughters when they will remain alone – an issue already  
282 addressed by the Italian Law 112/2016 on social inclusion and autonomy of people with disabilities.  
283 These considerations also suggest, on the one hand, that social centres and services are crucial but  
284 need to be implemented in areas where lacking to support people with PWS and their caregivers,  
285 and on the other hand, that focusing on work policies is necessary to create autonomy and social  
286 inclusion.

287 The acknowledgement of the importance of multiple intelligences[38] in everyday experience also  
288 may improve HRQOL both of people with PWS or caregivers, together with helping in fighting the  
289 social stigma around PWS and enhancing social inclusion. Moreover, multiple intelligences might  
290 become a tool in clinical practice to evaluate people with PWS better and globally.

1  
2  
3 291 The participants in the project did not equally represent Italian different geographical areas, due to  
4  
5  
6 292 the local distribution of expert centres in the management of care for PWS, and this could be a  
7  
8 293 selection bias. As for people with PWS, the inclusion criterium of being able to write represented a  
9  
10  
11 294 second bias.

12  
13 295 In conclusion, this NM project allowed to gather new insights to PWS individual and social  
14  
15 296 experiences, providing elements for improving a multidisciplinary approach to this condition: PWS  
16  
17  
18 297 social, relational, and emotional aspects crucially influence HRQOL and narratives can foster the  
19  
20 298 relationship with these families.

## 23 299 **Acknowledgements**

24  
25 300 The authors wish to thank all participants in the project, the Italian Prader-Willi Federation and the  
26  
27  
28 301 Prader-Willi Association of Lazio Region for their active contribution. Acknowledgements also to the  
29  
30 302 researchers of the Healthcare Area of ISTUD Foundation for their useful role throughout this project.

## 33 303 **Competing interests**

34  
35 304 Authors have nothing to disclose.

## 38 305 **Funding**

39  
40 306 This work was supported by Sandoz.

## 43 307 **Author contributions**

44  
45 308 Conceptualisation: Ragusa, Crinò, Grugni, Reale, Marini. Analysis: Reale, Fiorencis. Investigation:  
46  
47 309 Ragusa, Crinò, Grugni, Reale, Fiorencis, Licenziati, Faienza, Wasniewska, Delvecchio, Franzese,  
48  
49  
50 310 Rutigliano, Fusilli, Corica, Campana, Greco, Chiarito, Sacco, Toscano, Marini. Methodology: Reale,  
51  
52 311 Marini. Project administration: Reale. Ragusa, Crinò, Grugni, Reale, Marini. Report visualisation:  
53  
54  
55 312 Ragusa, Crinò, Grugni, Reale, Fiorencis, Licenziati, Faienza, Wasniewska, Delvecchio, Franzese,  
56  
57 313 Rutigliano, Fusilli, Corica, Campana, Greco, Chiarito, Sacco, Toscano, Marini. Methodology: Reale,  
58  
59  
60 314 Marini. Writing: Fiorencis, Ragusa, Crinò, Grugni, Reale, Marini. Editing: Fiorencis.

## Data sharing

All data relevant to the project are included in the present manuscript. Original narratives are available into Italian upon request at the email [areasanita@istud.it](mailto:areasanita@istud.it).

## References

1. Butler MG, Hartin SN, Hossain WA, Manzardo AM, Kimonis V, Dykens E, Gold JA, Kim SJ, Weisensel N, Tamura R, Miller JL, Driscoll DJ. Molecular genetic classification in Prader-Willi syndrome: a multisite cohort study. *J Med Genet* 2019 Mar;56(3):149-153.
2. Irizarry KA, Miller M, Freemark M, et al. Prader-Willi syndrome: genetics, metabolomics, hormonal function, and new approaches to therapy. *Adv Pediatr* 2016;63(1):47-77.
3. Cassidy SB, Schwartz S, Miller JL, et al. Prader-Willi syndrome. *Genet Med*. 2012 Jan;14(1):10-26.
4. Vogels A, Van Den Ende J, Keymolen K, et al. Minimum prevalence, birth incidence and cause of death for Prader-Willi syndrome in Flanders. *European Journal of Human Genetics* 2004;12, 238-40.
5. Heksch R, Kamboj M, Anglin K, et al. Review of Prader-Willi syndrome: the endocrine approach. *Transl Pediatr* 2017 Oct;6(4):274-285.
6. Angulo MA, Butler MG, Cataletto ME. Prader-Willi syndrome: A review of clinical, genetic, and endocrine findings. *J. Endocrinol. Invest* 2015; 38: 1249-63.
7. Crinò A, Di Giorgio G, Livieri C, et al. A survey on Prader-Willi syndrome in the Italian population: prevalence of historical and clinical signs. *J Pediatr Endocrinol Metab* 2009 Oct;22(10):883-93.
8. Hartley SL, Maclean WE Jr, Butler MG, et al. Maladaptive behaviors and risk factor among the genetic subtypes of Prader-Willi syndrome. *Am J Med Genet A* 2005 Jul 15;136(2):140-5.

1  
2  
3  
4  
5  
6  
7  
8  
9  
10  
11  
12  
13  
14  
15  
16  
17  
18  
19  
20  
21  
22  
23  
24  
25  
26  
27  
28  
29  
30  
31  
32  
33  
34  
35  
36  
37  
38  
39  
40  
41  
42  
43  
44  
45  
46  
47  
48  
49  
50  
51  
52  
53  
54  
55  
56  
57  
58  
59  
60

- 338 9. Manzardo AM, Loker J, Heinemann J, et al. Survival trends from the Prader-Willi Syndrome  
339 Association (USA) 40-year mortality survey. *Genet Med* 2018 Jan;20(1):24-30.
- 340 10. Guinovart M, Coronas R, Caixàs A. Psychopathological disorders in Prader-Willi syndrome.  
341 *Endocrinol Diabetes Nutr* 2019 Nov;66(9):579-587.
- 342 11. Sinnema M, Einfeld SL, Schrandt-Stumpel CT, et al. Behavioral phenotype in adults with  
343 Prader-Willi syndrome. *Res Dev Disabil* 2011;32(2):604-12.
- 344 12. Yang L, Zhan GD, Ding JJ, et al. Psychiatric illness and intellectual disability in the Prader-Willi  
345 syndrome with different molecular defects – a meta analysis. *PLoS One* 2013;8(8):e72640.
- 346 13. Miller JL, Lynn CH, Driscoll DC, et al. Nutritional phases in Prader-Willi syndrome. *Am J Med  
347 Genet A* 2011; 155A(5):1040-9.
- 348 14. Lanfranchi S, Vianello R. Stress, locus of control, and family cohesion and adaptability in  
349 parents of children with Down, Williams, Fragile X, and Prader-Willi syndromes. *Am J Intellect  
350 Dev Disabil* 2012; 117(3): 207-24.
- 351 15. Kayadjanian N, Schwartz L, Farrar E, et al. High levels of caregiver burden in Prader-Willi  
352 syndrome. *PLoS One* 2018 13(3): e0194655.
- 353 16. Mazaheri MM, Rae-Seebach RD, Preston HE, et al. The impact of Prader-Willi syndrome on  
354 the family's quality of life and caregiving, and the unaffected siblings' psychosocial  
355 adjustment. *J Intellect Disabil Res.* 2013 Sep;57(9):861-73.
- 356 17. Crinò A, Fintini D, Bocchini S, et al. Obesity management in Prader-Willi Syndrome: current  
357 perspectives. *Diabetes Metab Syndr Obes.* 2018 Oct 4;11:579-593.
- 358 18. Gunay-Aygun M, Schwartz S, Heeger S, et al. SB. 2001. The changing purpose of Prader-  
359 Willi syndrome clinical diagnostic criteria and proposed revised criteria. *Pediatrics* 108:e92.

- 1  
2  
3 360 19. Hartin SN, Hossain WA, Francis D, et al. Analysis of the Prader-Willi syndrome imprinting  
4  
5  
6 361 center using droplet digital PCR and next-generation whole-exome sequencing. *Mol Genet*  
7  
8 362 *Genomic Med* 2019 Apr;7(4):e00575.  
9
- 10 363 20. Grugni G, Marzullo P. Diagnosis and treatment of GH deficiency in Prader-Willi syndrome.  
11  
12  
13 364 *Best Pract Res Clin Endocrinol Metab.* 2016 Dec;30(6):785-794.  
14
- 15 365 21. Deal CL, Tony M, HoÈybye C, et al. Growth Hormone Research Society workshop summary:  
16  
17  
18 366 consensus guidelines for recombinant human growth hormone therapy in Prader-Willi  
19  
20 367 syndrome. *J Clin Endocrinol Metab* 2013; 98(6):E1072±87.  
21  
22
- 23 368 22. Sanchez-Ortiga R, Klibanski A, Tritos NA. Effects of recombinant human growth hormone  
24  
25 369 therapy in adults with Prader-Willi syndrome: a meta-analysis. *Clin Endocrinol (Oxf)* 2012;  
26  
27 370 77(1):86-93.  
28  
29
- 30 371 23. Moix Gil E, Giménez-Palop P, Caixàs A. Treatment with growth hormone in the prader-willi  
31  
32 372 syndrome. *Endocrinol Diabetes Nutr* 2018 Apr;65(4):229-236.  
33  
34
- 35 373 24. Bakker NE, Siemensma EP, van Rijn M, et al. Beneficial Effect of Growth Hormone Treatment  
36  
37 374 on Health-Related Quality of Life in Children with Prader-Willi Syndrome: A Randomized  
38  
39  
40 375 Controlled Trial and Longitudinal Study. *Horm Res Paediatr* 2015;84(4):231-9.  
41
- 42 376 25. Bertella L, Mori I, Grugni G, et al. Quality of life and psychological well-being in GH-treated,  
43  
44  
45 377 adult PWS patients: a longitudinal study. *J Intellect Disabil Res* 2007 Apr;51(Pt 4):302-11.  
46
- 47 378 26. Greenhalgh T. Cultural contexts of health: the use of narrative research in the health sector.  
48  
49  
50 379 Copenhagen: WHO Regional Office for Europe; 2016, Health Evidence Network (HEN)  
51  
52 380 synthesis report 49. Available from:  
53  
54 381 [http://www.euro.who.int/\\_data/assets/pdf\\_file/0004/317623/HEN-synthesis-report-](http://www.euro.who.int/_data/assets/pdf_file/0004/317623/HEN-synthesis-report-49.pdf)  
55  
56  
57 382 [49.pdf](http://www.euro.who.int/_data/assets/pdf_file/0004/317623/HEN-synthesis-report-49.pdf)  
58  
59  
60



- 1  
2  
3 383 27. Marini MG. Narrative Medicine: Bridging the gap between evidence-based care and medical  
4  
5  
6 384 humanities. London: Springer International Publishing, 2016.  
7  
8 385 28. Kleinman A. The illness narrative, suffering and healing the human condition. New York:  
9  
10 386 Basic Book, 1989.  
11  
12  
13 387 29. Greenhalgh T, Hurwitz B. Why study narrative? In: Greenhalgh T, Hurwitz B, editors.  
14  
15 388 Narrative based medicine: dialogue and discourse in clinical practice. *BMJ*, 1999; 318(7175):  
16  
17 389 48–50.  
18  
19  
20 390 30. Banfi P, Cappuccio A, Latella ME, et al. Narrative medicine to improve the management and  
21  
22 391 quality of life of patients with COPD: the first experience applying parallel chart in Italy. *Int J*  
23  
24 392 *Chron Obstruct Pulmon Dis* 2018 Jan 11;13:287-297.  
25  
26  
27 393 31. Marini MG, Chesi P, Mazzanti L, Guazzarotti L, et al. Stories of experiences of care for growth  
28  
29 394 hormone deficiency: the CRESCERE project. *Future Sci OA* 2016 Feb 25;2(1):FSO82.  
30  
31  
32 395 32. De Vincentis G, Monari F, Baldari S, et al. Narrative medicine in metastatic prostate cancer  
33  
34 396 reveals ways to improve patient awareness & quality of care. *Future Oncol* 2018  
35  
36 397 Nov;14(27):2821-2832.  
37  
38  
39 398 33. Charon R. The patient-physician relationship. Narrative Medicine: a model for empathy,  
40  
41 399 reflection, profession, and trust. *JAMA* 2001 Oct 17;286(15):1897-902.  
42  
43  
44 400 34. Peeters B, Marini M. Narrative Medicine Across Languages and Cultures: Using Minimal  
45  
46 401 English for Increased Comparability of Patients' Narratives. In Cliff Goddard, ed. Minimal  
47  
48 402 English for a Global World: Improved Communication Using Fewer Words, Palgrave  
49  
50 403 Macmillan, Basingstoke, United Kingdom, pp. 259-286. 2018.  
51  
52  
53 404 35. Bazeley P, Jackson K. Qualitative Data Analysis with NVivo. London: Sage, 2013.  
54  
55  
56 405 36. O'Brien BC, Harris IB, Beckman TJ, et al. Standards for reporting qualitative research: a  
57  
58 406 synthesis of recommendations. *Acad Med* 2014;89(9):1245-1251  
59  
60

- 1  
2  
3 407 37. Goffman E. *Stigma*. London: Penguin, 1963.  
4  
5  
6 408 38. Gardner H. *Frames of mind: The theory of multiple intelligences*. New York: Basic Books,  
7  
8 409 1983.  
9  
10  
11 410 39. Semenza C, Pignatti R, Bertella L, et al. Genetics and mathematics: evidence from Prader-  
12  
13 411 *Willi syndrome*. *Neuropsychologia* 2008 Jan 15;46(1):206-12.  
14  
15 412 40. Fanari R, Meloni C, Massidda D. Visual and spatial working memory abilities predict early  
16  
17  
18 413 math skills: a longitudinal study. *Fron Psychol* 2019;10:2460.  
19  
20 414 41. Mackenzie ML, Triador L, Gill JK, et al. Dietary intake in youth with prader-willi syndrome.  
21  
22  
23 415 *Am J Med Genet A* 2018 Nov;176(11):2309-2317.  
24  
25 416 42. Rubin DA, Wilson KS, Dumont-Driscoll M, et al. Effectiveness of a Parent-led Physical Activity  
26  
27  
28 417 Intervention in Youth with Obesity. *Med Sci Sports Exerc* 2019 Apr;51(4):805-813.  
29  
30 418 43. Duis J, van Wattum PJ, Scheimann A, et al. A multidisciplinary approach to the clinical  
31  
32  
33 419 management of Prader-Willi syndrome. *Mol Genet Genomic Med* 2019 Mar;7(3):e514.  
34  
35 420 44. Vogels A, Scheermeyer E. Coordination of the multidisciplinary treatment efforts. In: Hoybye  
36  
37 421 C, editor. *Prader-Willi Syndrome*. New York: Nova Science Publishers; 2013:229–254.  
38  
39  
40 422 45. Mackay J, McCallum Z, Ambler GR, et al. Requirements for improving health and well-being  
41  
42 423 of children with Prader-Willi syndrome and their families. *J Paediatr Child Health* 2019  
43  
44  
45 424 Sep;55(9):1029-1037.  
46

#### 47 425 **Figure legend**

48  
49  
50 426 Figure 1 – Age of PWS children at diagnosis  
51  
52  
53  
54  
55  
56  
57  
58  
59  
60

1  
2  
3  
4  
5  
6  
7  
8  
9  
10  
11  
12  
13  
14  
15  
16  
17  
18  
19  
20  
21  
22  
23  
24  
25  
26  
27  
28  
29  
30  
31  
32  
33  
34  
35  
36  
37  
38  
39  
40  
41  
42  
43  
44  
45  
46  
47  
48  
49  
50  
51  
52  
53  
54  
55  
56  
57  
58  
59  
60

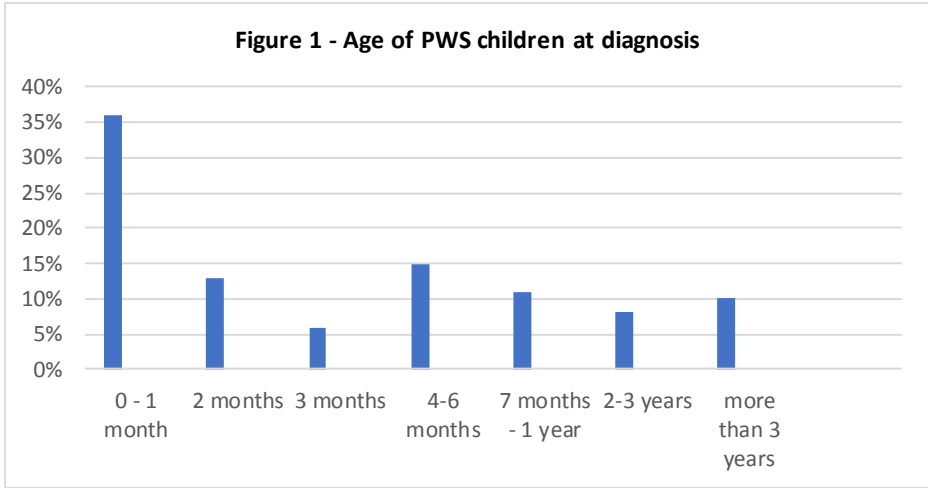

For peer review only

## Supplement 1

### Medical centres for paediatric and adult patients of the Italian Network for Rare Disease

OASI Maria SS., Research Institute, Troina (Enna), Italy

Bambino Gesù Paediatric Hospital, Research Institute, Palidoro (Rome), Italy

Istituto Auxologico Italiano, Research Institute, Piancavallo (Oggebbio, Verbania), Italy

Obesity and Endocrine Disease Unit, Department of Neuroscience, Santobono-Pausilipon

Children's Hospital, Naples, Italy

Department of Biomedical Sciences and Human Oncology, University of Bari "A. Moro", Bari, Italy

Department of Human Pathology of Adulthood and Childhood "G.Barresi", University of Messina, Italy

Metabolic Diseases, Clinical Genetics and Diabetology Unit, Giovanni XXIII Children's Hospital, Bari, Italy

Department of Translational Sciences, University Federico II, Naples, Italy

Department of Paediatrics, Casa Sollievo della Sofferenza Research Institute, San Giovanni Rotondo (Foggia), Italy

Neonatology Unit, Spirito Santo Hospital, Pescara, Italy

## Supplement 2

### Illness plot addressed to underaged people with PWS

Hi! Can you tell us about yourself? [...] May you introduce yourself and tell us about your life [...]. How do you feel with your friends [...], your schoolmates [...], and teachers? [...] You know that eating too much is not good for you: what do you do for not eating too much? [...] How do you feel with your family? [...] Can you tell us about your visits to the doctors? [...] What is your favorite game? [...] What will you do when you grow up? [...]

Thank you for the time and energy you dedicated. One last question:

How did you feel in narrating your experience? [...]

### Illness plot addressed to adult people with PWS

I introduce myself [...]. I feel [...]; at home [...]; at work [...]. The people next to me [...]. The food [...]. The treatments [...]. What I like to do [...]. For me, I think of a future [...].

Thank you for the time and energy you dedicated. One last question:

How did you feel in narrating your experience? [...]

### Illness plot addressed to caregivers of people with PWS

When I felt the first signs that something was going wrong [...] I feel [...]. They told us that it was [...]. The hospitals I visited, the professionals I met [...]. That period at home [...], at work [...]. The people next to me [...]. People around the person with PWS [...]. Food [...], and treatments [...]. Today the person with PWS [...], and treatments [...]; I feel [...]. At home, people with PWS [...]. Outside domestic context, the person with PWS [...]. What I like to do [...]; what the person with PWS likes, beyond food [...]. My life at home is [...]; the food [...]. I look at the person with PWS and I think for her/him a future [...], and for me I imagine a future [...].

1  
2  
3 Thank you for the time and energy you dedicated. One last question:  
4

5 How did you feel in narrating your experience? [...]  
6  
7  
8  
9  
10  
11  
12  
13  
14  
15  
16  
17  
18  
19  
20  
21  
22  
23  
24  
25  
26  
27  
28  
29  
30  
31  
32  
33  
34  
35  
36  
37  
38  
39  
40  
41  
42  
43  
44  
45  
46  
47  
48  
49  
50  
51  
52  
53  
54  
55  
56  
57  
58  
59  
60

For peer review only

# Reporting checklist for qualitative study.

Based on the SRQR guidelines.

## Instructions to authors

Complete this checklist by entering the page numbers from your manuscript where readers will find each of the items listed below.

Your article may not currently address all the items on the checklist. Please modify your text to include the missing information. If you are certain that an item does not apply, please write "n/a" and provide a short explanation.

Upload your completed checklist as an extra file when you submit to a journal.

In your methods section, say that you used the SRQR reporting guidelines, and cite them as:

O'Brien BC, Harris IB, Beckman TJ, Reed DA, Cook DA. Standards for reporting qualitative research: a synthesis of recommendations. *Acad Med.* 2014;89(9):1245-1251.

|                              | Reporting Item                                                                                                                                                                                                                                          | Page Number |
|------------------------------|---------------------------------------------------------------------------------------------------------------------------------------------------------------------------------------------------------------------------------------------------------|-------------|
| <b>Title</b>                 |                                                                                                                                                                                                                                                         |             |
|                              | <a href="#">#1</a> Concise description of the nature and topic of the study identifying the study as qualitative or indicating the approach (e.g. ethnography, grounded theory) or data collection methods (e.g. interview, focus group) is recommended | 1           |
| <b>Abstract</b>              |                                                                                                                                                                                                                                                         |             |
|                              | <a href="#">#2</a> Summary of the key elements of the study using the abstract format of the intended publication; typically includes background, purpose, methods, results and conclusions                                                             | 1-2         |
| <b>Introduction</b>          |                                                                                                                                                                                                                                                         |             |
| Problem formulation          | <a href="#">#3</a> Description and significance of the problem / phenomenon studied: review of relevant theory and empirical work; problem statement                                                                                                    | 2-4         |
| Purpose or research question | <a href="#">#4</a> Purpose of the study and specific objectives or questions                                                                                                                                                                            | 4           |

## 1 **Methods**

|    |                              |                     |                                                                 |
|----|------------------------------|---------------------|-----------------------------------------------------------------|
| 2  |                              |                     |                                                                 |
| 3  | Qualitative approach and     | <a href="#">#5</a>  | Qualitative approach (e.g. ethnography, grounded theory, case   |
| 4  | research paradigm            |                     | study, phenomenology, narrative research) and guiding theory    |
| 5  |                              |                     | if appropriate; identifying the research paradigm (e.g.         |
| 6  |                              |                     | postpositivist, constructivist / interpretivist) is also        |
| 7  |                              |                     | recommended; rationale. The rationale should briefly discuss    |
| 8  |                              |                     | the justification for choosing that theory, approach, method or |
| 9  |                              |                     | technique rather than other options available; the assumptions  |
| 10 |                              |                     | and limitations implicit in those choices and how those         |
| 11 |                              |                     | choices influence study conclusions and transferability. As     |
| 12 |                              |                     | appropriate the rationale for several items might be discussed  |
| 13 |                              |                     | together.                                                       |
| 14 |                              |                     |                                                                 |
| 15 |                              |                     |                                                                 |
| 16 |                              |                     |                                                                 |
| 17 |                              |                     |                                                                 |
| 18 |                              |                     |                                                                 |
| 19 |                              |                     |                                                                 |
| 20 | Researcher characteristics   | <a href="#">#6</a>  | Researchers' characteristics that may influence the research,   |
| 21 | and reflexivity              |                     | including personal attributes, qualifications / experience,     |
| 22 |                              |                     | relationship with participants, assumptions and / or            |
| 23 |                              |                     | presuppositions; potential or actual interaction between        |
| 24 |                              |                     | researchers' characteristics and the research questions,        |
| 25 |                              |                     | approach, methods, results and / or transferability             |
| 26 |                              |                     |                                                                 |
| 27 |                              |                     |                                                                 |
| 28 |                              |                     |                                                                 |
| 29 |                              |                     |                                                                 |
| 30 | Context                      | <a href="#">#7</a>  | Setting / site and salient contextual factors; rationale        |
| 31 |                              |                     |                                                                 |
| 32 |                              |                     |                                                                 |
| 33 | Sampling strategy            | <a href="#">#8</a>  | How and why research participants, documents, or events         |
| 34 |                              |                     | were selected; criteria for deciding when no further sampling   |
| 35 |                              |                     | was necessary (e.g. sampling saturation); rationale             |
| 36 |                              |                     |                                                                 |
| 37 |                              |                     |                                                                 |
| 38 | Ethical issues pertaining to | <a href="#">#9</a>  | Documentation of approval by an appropriate ethics review       |
| 39 | human subjects               |                     | board and participant consent, or explanation for lack thereof; |
| 40 |                              |                     | other confidentiality and data security issues                  |
| 41 |                              |                     |                                                                 |
| 42 |                              |                     |                                                                 |
| 43 | Data collection methods      | <a href="#">#10</a> | Types of data collected; details of data collection procedures  |
| 44 |                              |                     | including (as appropriate) start and stop dates of data         |
| 45 |                              |                     | collection and analysis, iterative process, triangulation of    |
| 46 |                              |                     | sources / methods, and modification of procedures in response   |
| 47 |                              |                     | to evolving study findings; rationale                           |
| 48 |                              |                     |                                                                 |
| 49 |                              |                     |                                                                 |
| 50 |                              |                     |                                                                 |
| 51 | Data collection instruments  | <a href="#">#11</a> | Description of instruments (e.g. interview guides,              |
| 52 | and technologies             |                     | questionnaires) and devices (e.g. audio recorders) used for     |
| 53 |                              |                     | data collection; if / how the instruments(s) changed over the   |
| 54 |                              |                     | course of the study                                             |
| 55 |                              |                     |                                                                 |
| 56 |                              |                     |                                                                 |
| 57 |                              |                     |                                                                 |
| 58 |                              |                     |                                                                 |
| 59 |                              |                     |                                                                 |
| 60 |                              |                     |                                                                 |



|    |                                                                                              |                     |                                                                                                                                                                                                                                                                                                          |      |
|----|----------------------------------------------------------------------------------------------|---------------------|----------------------------------------------------------------------------------------------------------------------------------------------------------------------------------------------------------------------------------------------------------------------------------------------------------|------|
| 1  | Units of study                                                                               | <a href="#">#12</a> | Number and relevant characteristics of participants, documents, or events included in the study; level of participation (could be reported in results)                                                                                                                                                   | 6    |
| 2  |                                                                                              |                     |                                                                                                                                                                                                                                                                                                          |      |
| 3  |                                                                                              |                     |                                                                                                                                                                                                                                                                                                          |      |
| 4  |                                                                                              |                     |                                                                                                                                                                                                                                                                                                          |      |
| 5  |                                                                                              |                     |                                                                                                                                                                                                                                                                                                          |      |
| 6  | Data processing                                                                              | <a href="#">#13</a> | Methods for processing data prior to and during analysis, including transcription, data entry, data management and security, verification of data integrity, data coding, and anonymisation / deidentification of excerpts                                                                               | 5-6  |
| 7  |                                                                                              |                     |                                                                                                                                                                                                                                                                                                          |      |
| 8  |                                                                                              |                     |                                                                                                                                                                                                                                                                                                          |      |
| 9  |                                                                                              |                     |                                                                                                                                                                                                                                                                                                          |      |
| 10 |                                                                                              |                     |                                                                                                                                                                                                                                                                                                          |      |
| 11 |                                                                                              |                     |                                                                                                                                                                                                                                                                                                          |      |
| 12 |                                                                                              |                     |                                                                                                                                                                                                                                                                                                          |      |
| 13 | Data analysis                                                                                | <a href="#">#14</a> | Process by which inferences, themes, etc. were identified and developed, including the researchers involved in data analysis; usually references a specific paradigm or approach; rationale                                                                                                              | 6    |
| 14 |                                                                                              |                     |                                                                                                                                                                                                                                                                                                          |      |
| 15 |                                                                                              |                     |                                                                                                                                                                                                                                                                                                          |      |
| 16 |                                                                                              |                     |                                                                                                                                                                                                                                                                                                          |      |
| 17 |                                                                                              |                     |                                                                                                                                                                                                                                                                                                          |      |
| 18 | Techniques to enhance trustworthiness                                                        | <a href="#">#15</a> | Techniques to enhance trustworthiness and credibility of data analysis (e.g. member checking, audit trail, triangulation); rationale                                                                                                                                                                     | 5    |
| 19 |                                                                                              |                     |                                                                                                                                                                                                                                                                                                          |      |
| 20 |                                                                                              |                     |                                                                                                                                                                                                                                                                                                          |      |
| 21 |                                                                                              |                     |                                                                                                                                                                                                                                                                                                          |      |
| 22 |                                                                                              |                     |                                                                                                                                                                                                                                                                                                          |      |
| 23 |                                                                                              |                     |                                                                                                                                                                                                                                                                                                          |      |
| 24 | <b>Results/findings</b>                                                                      |                     |                                                                                                                                                                                                                                                                                                          |      |
| 25 |                                                                                              |                     |                                                                                                                                                                                                                                                                                                          |      |
| 26 | Syntheses and interpretation                                                                 | <a href="#">#16</a> | Main findings (e.g. interpretations, inferences, and themes); might include development of a theory or model, or integration with prior research or theory                                                                                                                                               | 6-8  |
| 27 |                                                                                              |                     |                                                                                                                                                                                                                                                                                                          |      |
| 28 |                                                                                              |                     |                                                                                                                                                                                                                                                                                                          |      |
| 29 |                                                                                              |                     |                                                                                                                                                                                                                                                                                                          |      |
| 30 |                                                                                              |                     |                                                                                                                                                                                                                                                                                                          |      |
| 31 | Links to empirical data                                                                      | <a href="#">#17</a> | Evidence (e.g. quotes, field notes, text excerpts, photographs) to substantiate analytic findings                                                                                                                                                                                                        | 6-8  |
| 32 |                                                                                              |                     |                                                                                                                                                                                                                                                                                                          |      |
| 33 |                                                                                              |                     |                                                                                                                                                                                                                                                                                                          |      |
| 34 |                                                                                              |                     |                                                                                                                                                                                                                                                                                                          |      |
| 35 | <b>Discussion</b>                                                                            |                     |                                                                                                                                                                                                                                                                                                          |      |
| 36 |                                                                                              |                     |                                                                                                                                                                                                                                                                                                          |      |
| 37 | Intergration with prior work, implications, transferability and contribution(s) to the field | <a href="#">#18</a> | Short summary of main findings; explanation of how findings and conclusions connect to, support, elaborate on, or challenge conclusions of earlier scholarship; discussion of scope of application / generalizability; identification of unique contributions(s) to scholarship in a discipline or field | 8-11 |
| 38 |                                                                                              |                     |                                                                                                                                                                                                                                                                                                          |      |
| 39 |                                                                                              |                     |                                                                                                                                                                                                                                                                                                          |      |
| 40 |                                                                                              |                     |                                                                                                                                                                                                                                                                                                          |      |
| 41 |                                                                                              |                     |                                                                                                                                                                                                                                                                                                          |      |
| 42 |                                                                                              |                     |                                                                                                                                                                                                                                                                                                          |      |
| 43 |                                                                                              |                     |                                                                                                                                                                                                                                                                                                          |      |
| 44 |                                                                                              |                     |                                                                                                                                                                                                                                                                                                          |      |
| 45 |                                                                                              |                     |                                                                                                                                                                                                                                                                                                          |      |
| 46 | Limitations                                                                                  | <a href="#">#19</a> | Trustworthiness and limitations of findings                                                                                                                                                                                                                                                              | 10   |
| 47 |                                                                                              |                     |                                                                                                                                                                                                                                                                                                          |      |
| 48 | <b>Other</b>                                                                                 |                     |                                                                                                                                                                                                                                                                                                          |      |
| 49 |                                                                                              |                     |                                                                                                                                                                                                                                                                                                          |      |
| 50 | Conflicts of interest                                                                        | <a href="#">#20</a> | Potential sources of influence of perceived influence on study conduct and conclusions; how these were managed                                                                                                                                                                                           | 1    |
| 51 |                                                                                              |                     |                                                                                                                                                                                                                                                                                                          |      |
| 52 |                                                                                              |                     |                                                                                                                                                                                                                                                                                                          |      |
| 53 |                                                                                              |                     |                                                                                                                                                                                                                                                                                                          |      |
| 54 | Funding                                                                                      | <a href="#">#21</a> | Sources of funding and other support; role of funders in data collection, interpretation and reporting                                                                                                                                                                                                   | 1    |
| 55 |                                                                                              |                     |                                                                                                                                                                                                                                                                                                          |      |
| 56 |                                                                                              |                     |                                                                                                                                                                                                                                                                                                          |      |
| 57 |                                                                                              |                     |                                                                                                                                                                                                                                                                                                          |      |
| 58 |                                                                                              |                     |                                                                                                                                                                                                                                                                                                          |      |
| 59 |                                                                                              |                     |                                                                                                                                                                                                                                                                                                          |      |
| 60 |                                                                                              |                     |                                                                                                                                                                                                                                                                                                          |      |

1 None The SRQR checklist is distributed with permission of Wolters Kluwer © 2014 by the Association of  
2 American Medical Colleges. This checklist can be completed online using <https://www.goodreports.org/>, a tool  
3 made by the [EQUATOR Network](#) in collaboration with [Penelope.ai](#)  
4  
5  
6  
7  
8  
9  
10  
11  
12  
13  
14  
15  
16  
17  
18  
19  
20  
21  
22  
23  
24  
25  
26  
27  
28  
29  
30  
31  
32  
33  
34  
35  
36  
37  
38  
39  
40  
41  
42  
43  
44  
45  
46  
47  
48  
49  
50  
51  
52  
53  
54  
55  
56  
57  
58  
59  
60

For peer review only

# BMJ Open

## Caring and living with Prader–Willi syndrome in Italy: integrating children's, adults' and parents' experiences through a Narrative Medicine project

|                                 |                                                                                                                                                                                                                                                                                                                                                                                                                                                                                                                                                                                                                                                                                                                                                                                                                                                                                                                                                                                                                                                                                                                                                                                                                                                                                                                                                                                                                                                                                                                                                                                                                                                                                       |
|---------------------------------|---------------------------------------------------------------------------------------------------------------------------------------------------------------------------------------------------------------------------------------------------------------------------------------------------------------------------------------------------------------------------------------------------------------------------------------------------------------------------------------------------------------------------------------------------------------------------------------------------------------------------------------------------------------------------------------------------------------------------------------------------------------------------------------------------------------------------------------------------------------------------------------------------------------------------------------------------------------------------------------------------------------------------------------------------------------------------------------------------------------------------------------------------------------------------------------------------------------------------------------------------------------------------------------------------------------------------------------------------------------------------------------------------------------------------------------------------------------------------------------------------------------------------------------------------------------------------------------------------------------------------------------------------------------------------------------|
| Journal:                        | <i>BMJ Open</i>                                                                                                                                                                                                                                                                                                                                                                                                                                                                                                                                                                                                                                                                                                                                                                                                                                                                                                                                                                                                                                                                                                                                                                                                                                                                                                                                                                                                                                                                                                                                                                                                                                                                       |
| Manuscript ID                   | bmjopen-2019-036502.R1                                                                                                                                                                                                                                                                                                                                                                                                                                                                                                                                                                                                                                                                                                                                                                                                                                                                                                                                                                                                                                                                                                                                                                                                                                                                                                                                                                                                                                                                                                                                                                                                                                                                |
| Article Type:                   | Original research                                                                                                                                                                                                                                                                                                                                                                                                                                                                                                                                                                                                                                                                                                                                                                                                                                                                                                                                                                                                                                                                                                                                                                                                                                                                                                                                                                                                                                                                                                                                                                                                                                                                     |
| Date Submitted by the Author:   | 13-Mar-2020                                                                                                                                                                                                                                                                                                                                                                                                                                                                                                                                                                                                                                                                                                                                                                                                                                                                                                                                                                                                                                                                                                                                                                                                                                                                                                                                                                                                                                                                                                                                                                                                                                                                           |
| Complete List of Authors:       | Ragusa, Letizia; OASI Maria SS., Research Institute Crinò, Antonio; Bambino Gesù Paediatric Hospital - Palidoro, Research Institute<br>Grugni, Graziano; Istituto Auxologico Italiano , Department of Auxology Reale, Luigi; ISTUD Foundation<br>Fiorencis, Alessandra; Fondazione ISTUD, Licenziati, Maria Rosaria; Obesity and Endocrine Disease Unit, Department of Neuroscience, Santobono-Pausilipon Children's Hospital Faenza, MF; Università degli Studi di Bari Aldo Moro, Department of Biomedical Sciences and Human Oncology, Pediatrics Unit Wasniewska, Malgorzata; Department of Human Pathology of Adulthood and Childhood "G.Barresi", University of Messina<br>Delvecchio, Maurizio; Metabolic Diseases, Clinical Genetics and Diabetology Unit, Giovanni XXIII Children's Hospital Franzese, Adriana; University of Naples Federico II Department of Translational Medical Sciences<br>Rutigliano, Irene; Department of Pediatrics, IRCCS Casa Sollievo della Sofferenza<br>Fusilli, Paola; UOC Neonatologia, Ospedale "Spirito Santo"<br>Corica, Domenico; Department of Human Pathology of Adulthood and Childhood "G.Barresi"<br>Campana, Giuseppina; Obesity and Endocrine Disease Unit, Department of Neuroscience, Santobono-Pausilipon Children's Hospital<br>Greco, Donatella; , OASI Maria SS., Research Institute Chiarito, Mariangela; Department of Biomedical Sciences and Human Oncology, University of Bari "A. Moro"<br>Sacco, Michele; Department of Pediatrics, IRCCS Casa Sollievo della Sofferenza<br>Toscano, Silvia; Department of Translational Sciences, University Federico II<br>Marini, Maria Giulia; Fondazione ISTUD, Healthcare Area |
| <b>Primary Subject Heading</b>: | Qualitative research                                                                                                                                                                                                                                                                                                                                                                                                                                                                                                                                                                                                                                                                                                                                                                                                                                                                                                                                                                                                                                                                                                                                                                                                                                                                                                                                                                                                                                                                                                                                                                                                                                                                  |
| Secondary Subject Heading:      | Paediatrics, Diabetes and endocrinology                                                                                                                                                                                                                                                                                                                                                                                                                                                                                                                                                                                                                                                                                                                                                                                                                                                                                                                                                                                                                                                                                                                                                                                                                                                                                                                                                                                                                                                                                                                                                                                                                                               |
| Keywords:                       | QUALITATIVE RESEARCH, Paediatric endocrinology < DIABETES & ENDOCRINOLOGY, Paediatric clinical genetics & dysmorphology < GENETICS, Eating disorders < PSYCHIATRY                                                                                                                                                                                                                                                                                                                                                                                                                                                                                                                                                                                                                                                                                                                                                                                                                                                                                                                                                                                                                                                                                                                                                                                                                                                                                                                                                                                                                                                                                                                     |

1  
2  
3  
4  
5  
6  
7  
8  
9  
10  
11  
12  
13  
14  
15  
16  
17  
18  
19  
20  
21  
22  
23  
24  
25  
26  
27  
28  
29  
30  
31  
32  
33  
34  
35  
36  
37  
38  
39  
40  
41  
42  
43  
44  
45  
46  
47  
48  
49  
50  
51  
52  
53  
54  
55  
56  
57  
58  
59  
60

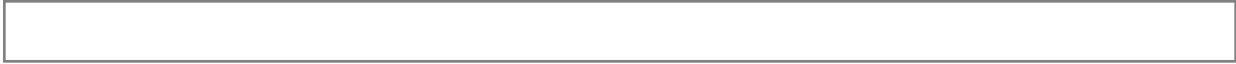

SCHOLARONE™  
Manuscripts

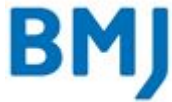

I, the Submitting Author has the right to grant and does grant on behalf of all authors of the Work (as defined in the below author licence), an exclusive licence and/or a non-exclusive licence for contributions from authors who are: i) UK Crown employees; ii) where BMJ has agreed a CC-BY licence shall apply, and/or iii) in accordance with the terms applicable for US Federal Government officers or employees acting as part of their official duties; on a worldwide, perpetual, irrevocable, royalty-free basis to BMJ Publishing Group Ltd ("BMJ") its licensees and where the relevant Journal is co-owned by BMJ to the co-owners of the Journal, to publish the Work in this journal and any other BMJ products and to exploit all rights, as set out in our [licence](#).

The Submitting Author accepts and understands that any supply made under these terms is made by BMJ to the Submitting Author unless you are acting as an employee on behalf of your employer or a postgraduate student of an affiliated institution which is paying any applicable article publishing charge ("APC") for Open Access articles. Where the Submitting Author wishes to make the Work available on an Open Access basis (and intends to pay the relevant APC), the terms of reuse of such Open Access shall be governed by a Creative Commons licence – details of these licences and which [Creative Commons](#) licence will apply to this Work are set out in our licence referred to above.

Other than as permitted in any relevant BMJ Author's Self Archiving Policies, I confirm this Work has not been accepted for publication elsewhere, is not being considered for publication elsewhere and does not duplicate material already published. I confirm all authors consent to publication of this Work and authorise the granting of this licence.

1  
2  
3  
4 1 **Caring and living with Prader–Willi syndrome in Italy: integrating**  
5  
6  
7 2 **children’s, adults’ and parents’ experiences through a Narrative**  
8  
9  
10 3 **Medicine project**  
11  
12

13 4 Letizia Ragusa<sup>1</sup>, Antonio Crinò<sup>2</sup>, Graziano Grugni<sup>3</sup>, Luigi Reale<sup>4</sup>, Alessandra Fiorencis<sup>4</sup>, Maria  
14  
15 5 Rosaria Licenziati<sup>5</sup>, Maria Felicia Faienza<sup>6</sup>, Malgorzata Wasniewska<sup>7</sup>, Maurizio Delvecchio<sup>8</sup>, Adriana  
16  
17 6 Franzese<sup>9</sup>, Irene Rutigliano<sup>10</sup>, Paola Fusilli<sup>11</sup>, Domenico Corica<sup>7</sup>, Giuseppina Campana<sup>5</sup>, Donatella  
18  
19 7 Greco<sup>1</sup>, Mariangela Chiarito<sup>6</sup>, Michele Sacco<sup>10</sup>, Silvia Toscano<sup>9</sup>, Maria Giulia Marini<sup>4</sup>  
20  
21

22 8 <sup>1</sup> OASI Maria SS., Research Institute, Troina (Enna), Italy.

23 9 <sup>2</sup> Bambino Gesù Paediatric Hospital, Research Institute, Palidoro (Rome), Italy.

24 10 <sup>3</sup> Istituto Auxologico Italiano, Research Institute, Piancavallo (Oggebbio, Verbania), Italy.

25 11 <sup>4</sup> ISTUD Foundation, Healthcare Area, Baveno (Verbania), Italy.

26 12 <sup>5</sup> Obesity and Endocrine Disease Unit, Department of Neuroscience, Santobono-Pausilipon Children’s Hospital, Naples,  
27 13 Italy.

28 14 <sup>6</sup> Department of Biomedical Sciences and Human Oncology, University of Bari "A. Moro", Bari, Italy.

29 15 <sup>7</sup> Department of Human Pathology of Adulthood and Childhood "G. Barresi", University of Messina, Italy.

30 16 <sup>8</sup> Metabolic Diseases, Clinical Genetics and Diabetology Unit, Giovanni XXIII Children’s Hospital, Bari, Italy.

31 17 <sup>9</sup> University Federico II, Department of Translational Sciences, Naples, Italy.

32 18 <sup>10</sup> Department of Pediatrics, Casa Sollievo della Sofferenza Research Institute, San Giovanni Rotondo (Foggia), Italy.

33 19 <sup>11</sup> Neonatology Unit, Spirito Santo Hospital, Pescara, Italy.

34  
35  
36  
37  
38  
39  
40  
41  
42  
43 20  
44  
45 21 \* Corresponding author: Alessandra Fiorencis, ISTUD Foundation, Strada Nazionale del Sempione  
46  
47 22 Oltrefiume 25, 28831 Baveno (VB), Italy, Tel. +39 0323 933 801, Mobile +39 3420499824, Fax 0323  
48  
49 23 933805, e-mail: [afiorencis@istud.it](mailto:afiorencis@istud.it).  
50  
51  
52  
53  
54  
55  
56  
57  
58

59 24 **Word count:** 3389  
60

1  
2  
3 26 **Keywords:** qualitative research, paediatric endocrinology, paediatric genetics and dysmorphology,  
4  
5  
6 27 eating disorders

7  
8 28 **ABSTRACT**

9  
10  
11 29 **Objectives.** Prader–Willi syndrome (PWS) significantly impacts health-related quality of life  
12  
13 30 (HRQoL); however, its relational and existential aspects remain unknown in Italian clinical and  
14  
15  
16 31 social debate. The project aimed to investigate the impact of PWS on illness experience through  
17  
18 32 narrative medicine (NM) to understand daily life, needs and resources of patients with PWS and  
19  
20  
21 33 their caregivers, and to furnish insights for clinical practice.

22  
23 34 **Design and setting.** The project involved 10 medical centres of the Italian Network for Rare  
24  
25  
26 35 Diseases and PWS family associations and targeted underaged and adult patients with PWS and  
27  
28 36 their caregivers. Written interviews, composed by a sociodemographic survey and a narrative,  
29  
30  
31 37 were collected through the project's website. Three dedicated illness plots employed evocative  
32  
33 38 and open words to facilitate individual expression and to encourage reflection. Narratives were  
34  
35  
36 39 analysed through NVivo software. Researchers discussed the results with the project's steering  
37  
38 40 committee.

39  
40 41 **Participants.** Twenty-one children and adolescents and 34 adults with PWS joined the project, as  
41  
42  
43 42 well as 138 caregivers. A PWS diagnosis or the caregiving of a patient with PWS older than 5 years  
44  
45  
46 43 represented the eligibility criteria, as well as the willingness to share their illness experience by  
47  
48 44 writing and the ability to communicate in Italian.

49  
50 45 **Results.** The analysis of narratives led to understanding the PWS social and relational issues  
51  
52  
53 46 concerning diagnosis and current management, PWS daily experiences and social contexts, PWS  
54  
55 47 implications in the working sphere, and participants' future perspectives. Narratives demonstrated  
56  
57  
58 48 that PWS management affects relationships and work-life balance and that social stigma remains  
59  
60 49 present.

1  
2  
3 50 **Conclusion.** The project represented the first effort to investigate the impact of PWS on illness  
4  
5  
6 51 experience in Italy through NM while considering the perspectives of patients with PWS and their  
7  
8 52 caregivers. The findings indicated that a multiprofessional approach is fundamental to ensure  
9  
10 53 adequate treatment and provided elements for its improvement.

## 13 54 **ARTICLE SUMMARY**

### 16 55 **Strengths and limitations of this study**

- 18 56 • Inclusion of patients with PWS' perspective in the project
- 20 57 • Narrative medicine approach
- 22 58 • Participants did not equally represent the geographical areas of Italy
- 24 59 • Among patients with PWS, researchers included only those able to write

## 31 61 **INTRODUCTION**

33 62 Prader–Willi syndrome (PWS) is a rare genetic condition caused by an absence of functioning  
34  
35 63 paternal genes on chromosome 15 in the 15q11-q13 region:[1] approximately 65%–70% of the  
36  
37  
38 64 cases are due to the deletion of this region, 20%–30% are caused by a maternal uniparental  
39  
40 65 disomy (UPD) of chromosome 15, and most of the remaining 2%–5% have an imprinting centre  
41  
42  
43 66 defect or unbalanced translocations (~1%).[2] PWS occurs in approximately 1 in 10,000 to 30,000  
44  
45 67 births,[3] affecting both sexes and all geographic areas.[4]

47  
48 68 Neonatal hypotonia, poor sucking and feeding difficulties characterise PWS in early infancy;  
49  
50 69 dysmorphic signs (mild craniofacial abnormalities, small hands and feet, kyphoscoliosis), multiple  
51  
52 70 endocrine abnormalities (growth hormone (GH)/IGF-I axis dysfunction, hypogonadism, central  
53  
54  
55 71 hypothyroidism, and central adrenal insufficiency) and developmental delay constitute other  
56  
57 72 cardinal features of the syndrome.[5-7] Learning disabilities, maladaptive behaviours and  
58  
59  
60 73 hyperphagia—leading to life-threatening obesity if uncontrolled—follow in childhood and



1  
2  
3 74 adulthood.[3, 8] The mortality rate of patients with PWS is higher than in the general  
4  
5  
6 75 population,[9] with a 3% annual death rate across all ages.

7  
8 76 Behavioural issues are noticeable in PWS, including aggressive and obsessive-compulsive  
9  
10  
11 77 behaviours and skin picking,[10, 11] and patients present a higher risk of developing psychiatric  
12  
13 78 illness in adulthood;[12] food-seeking behaviours are particularly complex and [13] significantly  
14  
15 79 affect patients' and caregivers' health-related quality of life (HRQoL). In particular, PWS  
16  
17  
18 80 caregivers—compared with other families managing children's disability or complex condition—  
19  
20 81 report a higher level of stress, more difficulties in coping with symptoms,[14] a higher caregiving  
21  
22  
23 82 burden,[15] and a lower HRQoL.[16]

24  
25 83 The clinical picture of patients with PWS substantially differs during the life span,[3, 6] and the  
26  
27  
28 84 prognosis is significantly conditioned by proactive interventions to prevent morbid weight  
29  
30 85 excess.[9] Currently, no treatment is available for PWS. However, early diagnosis combined with  
31  
32  
33 86 multidisciplinary care favourably influences the course of PWS:[17] consequently, the diagnosis  
34  
35 87 should be confirmed early during the neonatal period,[18] also with the support of genetic testing  
36  
37  
38 88 development.[19] In this context, early GH treatment has beneficial outcomes on, for example,  
39  
40 89 height, body composition, endurance, and sense of well-being;[20-22] furthermore, early  
41  
42 90 treatment with recombinant GH positively affects PWS[23] patients' and caregivers' HRQoL.[24,  
43  
44  
45 91 25]

46  
47 92 The social, relational, emotional, and existential aspects of PWS remain profoundly unknown, and  
48  
49  
50 93 the debate within Italian clinical and social communities has been poor: The World Health  
51  
52 94 Organisation has stressed the importance of researching the measurable dimensions of HRQoL  
53  
54 95 and—more broadly—illness experiences in leading clinical and social practice and recommends  
55  
56  
57 96 using narrative research.[26]

1  
2  
3 97 The discipline of narrative medicine (NM), based on illness narratives,[27] pursues the integration  
4  
5  
6 98 of the disease-centred approach and is concerned with clinical aspects and the illness-centred and  
7  
8 99 sickness-centred approaches, which respectively focus on individual experience and the social  
9  
10  
11 100 understanding of a specific condition,[28] and both have often been neglected by the scientific  
12  
13 101 community. The range of applications for narrative medicine is from clinical practice to  
14  
15 102 therapeutic path design, education and research.[29] In research, narratives have demonstrated  
16  
17  
18 103 possible interventions on a specific condition through the integration of all perspectives involved  
19  
20 104 in the pathway of care.[30, 31] Combining evidence-based medicine and NM provides clinicians  
21  
22  
23 105 methods to strengthen clinical practices with narrative competences.[29] NM research addresses  
24  
25 106 the individual's experience when coping with distress caused by clinical conditions: It allows for  
26  
27  
28 107 the understanding of the profound experiences, needs and values of all actors involved in the care  
29  
30 108 pathway.[27, 32] Scientific societies, healthcare facilities, and patient associations have  
31  
32  
33 109 increasingly employed NM research findings to improve the organisation and efficacy of  
34  
35 110 healthcare services, generating sustainability[26] and fostering quality of care for patients and  
36  
37 111 their social and relational contexts.[27]

38  
39  
40 112 The NM project "PRAXIS: Prader-Willi Excellence in Care with Story Taking" aimed to investigate  
41  
42 113 the PWS illness experience by employing the analysis of narratives (a) to understand daily life, real  
43  
44  
45 114 needs and personal resources of people with PWS and their caregivers from diagnosis to current  
46  
47 115 management, and by doing so, (b) furnish insights to support a multidisciplinary and a  
48  
49  
50 116 multiprofessional perspective in PWS clinical practice.[17] According to our review of the  
51  
52 117 literature, no other project has addressed these issues simultaneously by considering the  
53  
54  
55 118 perspectives of underaged and adult patients with PWS and their caregivers.

## 56 57 119 **METHODS**

### 58 59 120 **Patient and public involvement**

60

1  
2  
3  
4  
5  
6  
7  
8  
9  
10  
11  
12  
13  
14  
15  
16  
17  
18  
19  
20  
21  
22  
23  
24  
25  
26  
27  
28  
29  
30  
31  
32  
33  
34  
35  
36  
37  
38  
39  
40  
41  
42  
43  
44  
45  
46  
47  
48  
49  
50  
51  
52  
53  
54  
55  
56  
57  
58  
59  
60

121 The project was conducted in Italy between October 2018 and July 2019, as a part of a broader  
122 research project, and targeted people with PWS and their caregivers, as well as professionals  
123 working with PWS. The professionals underwent a webinar conducted by researchers from the  
124 “Istituto Studi Direzionali” (Institute of Management Studies, ISTUD) Foundation to be trained in  
125 NM and on the project’s aims and methods; moreover, a parallel chart[27, 33] was identified as  
126 the most suitable NM tool to collect their narratives because it constitutes a personal notebook,  
127 parallel to the clinical record, in which professionals can write their impressions and feelings in  
128 plain language as a supplement to technical and quantitative reports.[27, 30, 33] Participants with  
129 PWS were given the possibility to express by drawing if under 5 years old or if unable to write;  
130 however, some participants over the threshold of 5 years old decided to maintain both the  
131 opportunities of expression.

132 The target group was people with PWS aged older than 5 years and their caregivers. Participants  
133 were recruited from 10 medical centres for paediatric and adult patients in the Italian Network for  
134 Rare Diseases (Supplement 1), namely six general hospitals and four scientific institutes of  
135 research, hospitalisation and healthcare: All the medical centres were macroregional, hospital-  
136 based centres that specialised in PWS treatment, and they were distributed among geographical  
137 areas (North, Central and South Italy). The Italian Prader–Willi Federation, and the Prader–Willi  
138 Association of the Lazio Region were also involved in disseminating the project; in particular, they  
139 organised three seminars—one each in the Lombardy, Lazio and Sicily regions—to provide the  
140 caregivers of those regions the opportunity to be further informed on NM and the project’s aims  
141 and methods.

142 A PWS diagnosis, determined at the reference medical centre, or a caregiver for a person older  
143 than 5 years with PWS represented the eligibility criteria, as well as the willingness to share their  
144 illness experience by writing; thus, the ability to communicate in Italian was indispensable for the

1  
2  
3 145 inclusion in the project. Participants were informed of the possibility to view the projects (in  
4  
5  
6 146 Italian) on the project's webpage: [www.medicinanarrativa.eu/praxis](http://www.medicinanarrativa.eu/praxis).

### 8 147 **Data collection**

9  
10 148 Written stories of experiences were collected anonymously through the project's webpage; next,  
11  
12  
13 149 raw and anonymous narratives were downloaded as a Microsoft Excel spreadsheet. A  
14  
15 150 sociodemographic survey constituted the written narrative, together with an illness plot[34, 35],  
16  
17  
18 151 namely, a plot related to the illness experience: It serves to guide narratives in a chronological  
19  
20 152 order to identify evolutions over time and is characterised by evocative and open words that  
21  
22  
23 153 facilitate individual expression.[36]

24  
25 154 Three illness plots were designed for three different groups—underage and adult patients with  
26  
27  
28 155 PWS, and caregivers (Supplement 2)—while addressing common aspects: (a) diagnosis and current  
29  
30 156 management of the condition, namely the strategies related to food behaviours; (b) daily living  
31  
32  
33 157 with PWS, namely, the relational sphere and social context; and (c) the work experience and  
34  
35 158 future perspectives.

36  
37 159 The project design and the research tools were created by the project's steering committee, which  
38  
39  
40 160 comprised three endocrinologist experts in PWS, namely, one each from the Oasi Maria SS.  
41  
42 161 Research Institute (Troina, Italy), the Bambino Gesù Paediatric Hospital of Palidoro (Rome, Italy),  
43  
44  
45 162 and the Istituto Auxologico Italiano of Piancavallo (Oggebbio, Italy), and three researchers from  
46  
47 163 the ISTUD Foundation different for academic backgrounds, to reduce the personal influence on  
48  
49  
50 164 the research.

### 52 165 **Ethical considerations**

53  
54 166 The project was performed according to the principles of the Declaration of Helsinki. Before the  
55  
56  
57 167 participants' involvement, they provided written informed consent after being briefed on the  
58  
59 168 project's purpose and confidential data handling procedures, according to the Italian Law  
60

1  
2  
3  
4  
5  
6  
7  
8  
9  
10  
11  
12  
13  
14  
15  
16  
17  
18  
19  
20  
21  
22  
23  
24  
25  
26  
27  
28  
29  
30  
31  
32  
33  
34  
35  
36  
37  
38  
39  
40  
41  
42  
43  
44  
45  
46  
47  
48  
49  
50  
51  
52  
53  
54  
55  
56  
57  
58  
59  
60

196/2003 on Privacy and the Safeguarding of Sensitive Data.[37] Involved professionals obtained written informed consent to participate from parents and tutors for underaged participants during the first interview on the project's methods and purposes. Next, the professionals briefed the underage patients on the project and obtained their verbal consent to participate. Moreover, written informed consent to participate was obtained from adult participants and/or their tutors when appropriate. The Ethical Committee of the Oasi Maria SS. Research Institute (Troina, Italy) approved the project in January 2019 with the ethics approval number 2019/01/09/CE-IRCCS-OASI/19.

### **Analysis**

We analysed the sociodemographic survey through descriptive statistics; no question was mandatory.

Anonymous narratives were entered into NVivo software[38] for coding and analysis. ISTUD researchers collectively coded 10 narratives in NVivo to assess consistency across team members. Afterwards, each narrative was coded separately by at least two researchers and then reviewed during weekly meetings and peer-debriefings to reduce bias in the interpretation of texts. Open interpretive coding was employed to identify and analyse emerging topics; Kleinman's[28] classification was retrospectively applied to the analysis of narratives because the researchers considered it the most suitable to further reveal illness-related and sickness-related aspects in narratives, respectively concerning the personal and emotional experience of a condition and how is it perceived within society.

The analysis process and results were shared within the project's steering committee to collectively address emerged topics and interpretation of data. Researchers followed the Standards for Reporting Qualitative Research (SRQR) Reporting Guidelines.[39]

### **RESULTS**

1  
2  
3 193 **Sociodemographic aspects**

4  
5  
6 194 Twenty-one children and adolescents and 34 adults with PWS participated in the project, as well  
7  
8 195 as 138 caregivers. Table 1 summarises the sociodemographic data of these three groups; the  
9  
10 196 representation includes nonresponses as a separate category.

11  
12  
13 **Table 1 – Sociodemographic data of participants**

|                                                                                  | Minors with PWS<br>(N = 21) | Adults with PWS<br>(N = 34) | PWS caregivers<br>(N = 138) |
|----------------------------------------------------------------------------------|-----------------------------|-----------------------------|-----------------------------|
| <b>Gender</b>                                                                    |                             |                             |                             |
| Females                                                                          | 6 (29%)                     | 19 (56%)                    | 99 (72%)                    |
| Males                                                                            | 15 (71%)                    | 15 (44%)                    | 37 (27%)                    |
| Nonresponses                                                                     | 0                           | 0                           | 2 (1%)                      |
| <b>Age</b>                                                                       |                             |                             |                             |
| Average age (yrs)                                                                | 14 ( $\pm 3,09$ )           | 29 ( $\pm 9,72$ )           | 48 ( $\pm 9,04$ )           |
| Minimum                                                                          | 7                           | 19                          | 20                          |
| Maximum                                                                          | 18                          | 48                          | 61                          |
| <b>Geographic residence</b>                                                      |                             |                             |                             |
| Northern Italy                                                                   | 3 (13%)                     | 19 (58%)                    | 29 (21%)                    |
| Central Italy                                                                    | 4 (19%)                     | 6 (18%)                     | 40 (29%)                    |
| Southern Italy                                                                   | 14 (69%)                    | 9 (24%)                     | 69 (50%)                    |
| Nonresponses                                                                     | 0                           | 0                           | 0                           |
| <b>Education</b>                                                                 |                             |                             |                             |
| Elementary school                                                                | 10 (48%)                    | 2 (6%)                      | 5 (4%)                      |
| Middle school                                                                    | 5 (24%)                     | 10 (30%)                    | 19 (14%)                    |
| High school                                                                      | 2 (10%)                     | 21 (64%)                    | 76 (55%)                    |
| University degree                                                                | 0                           | 1 (1%)                      | 19 (14%)                    |
| Nonresponses                                                                     | 4 (19%)                     | 0                           | 19 (13%)                    |
| <b>Marital status</b>                                                            |                             |                             |                             |
| Single                                                                           | 21 (100%)                   | 33 (97%)                    | 3 (2%)                      |
| Married/ cohabitate                                                              | 0                           | 1 (3%)                      | 118 (86%)                   |
| Divorced/separated                                                               | 0                           | 0                           | 14 (10%)                    |
| Widowed                                                                          | 0                           | 0                           | 3 (2%)                      |
| Nonresponses                                                                     | 0                           | 0                           | 0                           |
| <b>Employment status</b>                                                         |                             |                             |                             |
| Student                                                                          | 21 (100%)                   | 4 (11%)                     | 3 (2%)                      |
| Working                                                                          | 0                           | 19 (56%)                    | 94 (68%)                    |
| Not working                                                                      | 0                           | 11 (33%)                    | 38 (28%)                    |
| Retired                                                                          | 0                           | 0                           | 3 (2%)                      |
| Nonresponses                                                                     | 0                           | 0                           | 0                           |
| <i>Data presented as N (%) or mean (standard deviation) and minimum/maximum.</i> |                             |                             |                             |

14  
15  
16  
17  
18  
19  
20  
21  
22  
23  
24  
25  
26  
27  
28  
29  
30  
31  
32  
33  
34  
35  
36  
37  
38  
39  
40  
41  
42  
43  
44  
45  
46  
47  
48  
49  
50 197  
51  
52 198 Results from the analysis are presented by following the dedicated illness plots' structure: (a) the  
53  
54  
55 199 first section concerns PWS diagnosis and current management, in which narratives' illness-related  
56  
57 200 and sickness-related aspects, caregivers' perspectives on therapeutic path, and strategies to  
58  
59  
60 201 manage food-seeking behaviours are addressed; (b) the second section focuses on living with PWS

1  
2  
3  
4  
5  
6  
7  
8  
9  
10  
11  
12  
13  
14  
15  
16  
17  
18  
19  
20  
21  
22  
23  
24  
25  
26  
27  
28  
29  
30  
31  
32  
33  
34  
35  
36  
37  
38  
39  
40  
41  
42  
43  
44  
45  
46  
47  
48  
49  
50  
51  
52  
53  
54  
55  
56  
57  
58  
59  
60

202 in relational and social contexts and addresses participants' indoor and outdoor daily activities; (c)  
203 the third section concerns caregivers' and PWS adult patients' narratives on the working sphere  
204 and participants' future perspectives and desires.

### 205 **From diagnosis to the current management of PWS**

206 Thirty-six percent of caregivers reported that their children were diagnosed with PWS within the  
207 first month of life (Figure 1); however, 10% affirmed that the diagnosis occurred after the child's  
208 third year of life.

209 In narratives, 95% of caregivers focused on PWS illness- and sickness-related aspects (Table 2); the  
210 remaining 5% adopted technical and clinical language[28] to discuss the condition, as exemplified  
211 in the following two quotes from narratives: (a) *She was hospitalised at the Neurology department*  
212 *for a muscle biopsy, she was diagnosed with congenital myopathy, and two years later, she*  
213 *underwent the DNA test; she was sent to the hospital in Northern Italy, and from there, we got the*  
214 *Prader–Willi diagnosis; (b) Adenoids, laryngotomy, broken arm fracture, desmoid, flat foot,*  
215 *strabismus, he has been taking GH since he was a child. Disbelief, displacement, anger, and pain*  
216 *represented the most recurrent emotions expressed by caregivers when attempting to adapt to*  
217 *the situation and its criticalities. Patients with PWS—underaged and adult—described the*  
218 *condition only through its illness-related and sickness-related facets.*

Table 2 – Illness- and sickness-related aspects: quotes from narratives

|                | Caregivers                                                                                                                                                                                                                                                                                                                                                                                                                                                                                                                                                                                                                                                                                                                                                                     | Minors and adults with PWS                                                                                                                                                                                                                                                                                                                                                                                                                                                                |
|----------------|--------------------------------------------------------------------------------------------------------------------------------------------------------------------------------------------------------------------------------------------------------------------------------------------------------------------------------------------------------------------------------------------------------------------------------------------------------------------------------------------------------------------------------------------------------------------------------------------------------------------------------------------------------------------------------------------------------------------------------------------------------------------------------|-------------------------------------------------------------------------------------------------------------------------------------------------------------------------------------------------------------------------------------------------------------------------------------------------------------------------------------------------------------------------------------------------------------------------------------------------------------------------------------------|
| <b>Illness</b> | <ul style="list-style-type: none"> <li>– <i>It is not easy to live with a child with this syndrome, especially when she asks for food. I tell her “No”, and she starts crying and getting upset, screaming and telling me things I do not understand, but I do not give up.</i></li> <li>– <i>Broken dreams, the feeling that something had changed forever, that my life had changed. I used to be so self-confident, so independent, and suddenly I felt fragile, scared and alone, dreadfully alone and unable to react.</i></li> <li>– <i>The first emotion was fear. I did not know how to manage his crises for food. I did not understand what was happening to us, and every time we go to the doctor, we were reopening the wound, with all its fears.</i></li> </ul> | <ul style="list-style-type: none"> <li>– <i>I feel proud, disability does not scare me.</i></li> <li>– <i>Sometimes I feel happy, and sometimes sad because I have this disease.</i></li> <li>– <i>I feel happy, sometimes a bit sad about my illness. But I am happy because the Lord created me, and I like myself as I came into existence.</i></li> <li>– <i>I feel a little sad for having this rare disease; there are many difficulties, especially not overeating.</i></li> </ul> |

– When my son was born, doctors immediately told me that something was wrong. It was terrible. I was young, and he was my long-awaited first child.

#### Sickness

– Concern intensifies if I think that he will start school in September. I am worried about his level of tolerance if he will become the object of insults and bullying.

– Taking care of a boy with Prader-Willi syndrome means changing the lifestyles of the whole family and combining the needs related to the disease with those of the family. It is a different journey, which could limit life experiences to those who do not have this kind of availability.

– If I think of my child and her syndrome, I feel a great sorrow because I do not know if she will ever have a normal life.

– Often, we felt desperate, especially thinking about our son's future. Then we learned to deal with problems as they arose.

– Other people are bad. They do not care about me because I have the syndrome.

– I do not feel up to the kids of my generation. I hate me, I want to die. Sometimes I would like to be a boy like the others, and always be happy.

– Prader-Willi syndrome lasts a lifetime. It is difficult to communicate with others, even with parents in the family.

– On the one hand, I feel different from others because I am disabled and hypotonic. On the other hand, I feel like them because I was lucky enough to walk, to see and to hear.

In Table 3, a focus on therapeutic paths from the caregivers' perspective meant addressing (a) relationships with professionals and (b) healthcare structures, both differing for specialisation and competence in PWS, and the (c) necessary or employed treatments, beyond diet.

**Table 3 – PWS caregivers' perspective on therapeutic path: quotes from narratives**

|                              |                                                                                                                                                                                                                                                                                                                                                                                                                                                                                                                                                                                                                                                                                                                                                                                                                                                                    |
|------------------------------|--------------------------------------------------------------------------------------------------------------------------------------------------------------------------------------------------------------------------------------------------------------------------------------------------------------------------------------------------------------------------------------------------------------------------------------------------------------------------------------------------------------------------------------------------------------------------------------------------------------------------------------------------------------------------------------------------------------------------------------------------------------------------------------------------------------------------------------------------------------------|
| <b>Professionals</b>         | <p>– Thanks to the specialist, we set up an appointment at the hospital, where we are currently followed. The cases they deal with are many, and for us, this is a guarantee. On a human level, they are unparalleled, available, smiling, and this allows you to spend more peaceful time, without feeling a burden.</p> <p>– I started attending health workers, support teachers and incapable teachers, unprepared paediatricians, arrogant doctors, medical commissions, courts. I clashed with bureaucracy, absurd health protocols, illogical rules to get what my daughter was entitled to and her psycho-physical well-being.</p> <p>– I was disappointed by the professionals. They talked about my son and my life as something unmodifiable, fatal, hopeless. I decided to get as far away as possible. My son was not a syndrome, he was a child.</p> |
| <b>Healthcare structures</b> | <p>– We do not live in a big city, so we had great difficulty getting our daughter adequately followed.</p> <p>– At the hospital they showed us the path we should have taken... on a medical level! On a therapeutic level, I had to resort to private professionals and centres.</p> <p>– Miles of road and hotel rooms characterise the therapeutic path that weighs on the family, both in economic terms and stress.</p>                                                                                                                                                                                                                                                                                                                                                                                                                                      |
| <b>Treatments</b>            | <p>– This part turned out to be better than expected. The only medicine is GH, which is simple and painless.</p> <p>– Psychomotricity, GH, speech and music therapy, psychological support and sport.</p> <p>– During adolescence, we had to resort to psychiatric drugs: this was a defeat for us, but it was necessary, our son had become unmanageable. Psychiatrists have a little knowledge of the syndrome.</p>                                                                                                                                                                                                                                                                                                                                                                                                                                              |



1  
2  
3 224 From caregivers' narratives, food-seeking behaviours[13] emerged as the most challenging event  
4  
5  
6 225 within the domestic context. Caregivers were aware that feeding is the first treatment for people  
7  
8 226 with PWS and sought strategies to feed them. Fifty percent declared that they had achieved a  
9  
10  
11 227 balance, and the other 50% reported a problematic relationship with food. Both underaged and  
12  
13 228 adult participants with PWS were aware of the importance of following a diet: positive or negative  
14  
15 229 relationships with food emerged from narratives, where (a) the positive relationships also  
16  
17  
18 230 represented the result of commitment and several strategies to manage food-seeking behaviours,  
19  
20 231 and (b) food-seeking was related to emotions (e.g. anger). Table 4 shows the main elements that  
21  
22  
23 232 emerged from the caregivers' and PWS participants' narratives.

**Table 4 – Attitudes towards food-seeking behaviours: quotes from narratives**

|                      | Caregivers                                                                                                                                                                                                                                                                                                                                                                                                                                                                                                                                                                                                                                                                                                                   | Minors and adults with PWS                                                                                                                                                                                                                                                                                                                                                                                                                                                                                         |
|----------------------|------------------------------------------------------------------------------------------------------------------------------------------------------------------------------------------------------------------------------------------------------------------------------------------------------------------------------------------------------------------------------------------------------------------------------------------------------------------------------------------------------------------------------------------------------------------------------------------------------------------------------------------------------------------------------------------------------------------------------|--------------------------------------------------------------------------------------------------------------------------------------------------------------------------------------------------------------------------------------------------------------------------------------------------------------------------------------------------------------------------------------------------------------------------------------------------------------------------------------------------------------------|
| <b>Commitment</b>    | <p>– <i>The first thing I did was going to visit a professor in Switzerland to find a diet as clean as possible that could give strength and good energy to my child. I decided to follow it too.</i></p> <p>– <i>We started a different relationship with food, and to be more aware of what we could and could not eat.</i></p> <p>– <i>We tried to get the whole family accustomed to healthy eating as much as possible. I teach my son to read nutrition labels so he can choose the best one day. He already knows that he must not overeat sugar and fat; we eat at precise times, but managing hunger is not easy.</i></p>                                                                                           | <p>– <i>I have a good relationship with food, I can control myself, I eat legumes and soups, and pasta in the evening. I really like vegetables.</i></p> <p>– <i>I follow the correct diet, and I never steal food. If someone offers me something, I can refuse.</i></p> <p>– <i>I am following a diet prepared by a nutritionist.</i></p>                                                                                                                                                                        |
| <b>Strategies</b>    | <p>– <i>We have almost always managed to keep it under control; we focused a lot on food education (salads, vegetables, no snacks). We gave her the possibility to choose among certain foods. Therefore, she was more satisfied, allowing us to eat differently.</i></p> <p>– <i>Food is the main problem for my child; there are both positive and negative moments. So, we are tough if we need to be tough, but sometimes we make some exceptions.</i></p> <p>– <i>Food is always on our minds, but we try to manage everything at best. We try to live a life as normal as possible, and we try not to upset his habits. We give him some extras (he goes to parties, out with some friends, and to eat pizza).</i></p> | <p>– <i>I like to eat everything. I try to eat lots of vegetables, even if this does not fill me, and whole wheat pasta. When I play or do a puzzle, I do not think about hunger. Mom tells me that if I want to eat more, I have to do more movement.</i></p> <p>– <i>I try to organise my day according to fixed patterns, and I know I can eat at certain times.</i></p> <p>– <i>In order not to think about food, I go for long walks, I do crossword puzzles and puzzles, I play tablet and computer.</i></p> |
| <b>Criticalities</b> | <p>– <i>Unfortunately, food is an obsession and challenging to manage. Many times, I found my little child with hidden food.</i></p> <p>– <i>The food issue becomes a daily challenge. Lunches and dinners are no longer quiet, and</i></p>                                                                                                                                                                                                                                                                                                                                                                                                                                                                                  | <p>– <i>I eat out of meal because I hate me... I am hungry because my parents do not give me the right portions, and then I get fat and hospitalised, I steal food and go to the bar because I am hungry. I do not follow the diet.</i></p>                                                                                                                                                                                                                                                                        |

1  
2  
3  
4  
5  
6  
7  
8  
9  
10  
11  
12

---

*you live very anxiously. The kitchen is no longer a meeting place.*

*– It is our conviction, a continuous struggle, day and night, the monster we have to defeat.*

*– Seeing the other people eating is painful.*

*– When I think of food, my eyes shine, and when I see something to eat, I want it at all costs, and I cannot stop myself. I am always hungry, and I never get enough; when I overeat, I feel sick. When they tell me that I cannot eat so much, I get angry and nervous.*

---

13 234 **Living with PWS in relationships and in social contexts**

15 235 Thirty-six percent of PWS caregivers described daily life at home as quiet; however, most (64%)  
16  
17  
18 236 reported: fatigue (21%), chaos (6%), all-encompassing assistance (20%), and using tested routines  
19  
20 237 to better manage food-seeking behaviours (17%). They have attempted to maintain their hobbies,  
21  
22  
23 238 interests and outside activities, even though their sons and daughters have PWS (Table 5).  
24  
25 239 Relationships external to the family are difficult to preserve, imposing a radical change in social  
26  
27  
28 240 life. Indoor and outdoor activities represented an essential tool for caregivers in managing  
29  
30 241 emotion patterns and food-seeking behaviours: narratives demonstrated that underaged and  
31  
32 242 adult participants with PWS were aware of that. Sport, mind activity games, gardening and pet  
33  
34  
35 243 therapy were some of the most helpful activities reported; furthermore, patients with PWS  
36  
37 244 appeared dedicated to cleanliness and routine activities. Both relational and activity spheres  
38  
39  
40 245 revealed the influence of behavioural and emotional changes in daily life and in familiar and social  
41  
42 246 contexts; moreover, narratives addressed the strong presence of caregivers, as well as situations  
43  
44  
45 247 of social inclusion or exclusion.

46  
47 **Table 5 – Living with PWS in activities and relationships: quotes from narratives**

|                           | Caregivers                                                                                                                                                                                                                                                                                                                                                                                                     | Minors and adults with PWS                                                                                                                                                                                                                                                                                                                                                                                                                                                                      |
|---------------------------|----------------------------------------------------------------------------------------------------------------------------------------------------------------------------------------------------------------------------------------------------------------------------------------------------------------------------------------------------------------------------------------------------------------|-------------------------------------------------------------------------------------------------------------------------------------------------------------------------------------------------------------------------------------------------------------------------------------------------------------------------------------------------------------------------------------------------------------------------------------------------------------------------------------------------|
| <b>Indoor activities</b>  | <p><i>– I like talking to my daughter, finding out what she wants to do and meeting her demands. I like to see her play with her friends and laugh because she is lovely and charismatic.</i></p> <p><i>– I love being with my family; I'm a full-time mom. I would like to go to the gym and to be a woman like the others, but I do not have time.</i></p> <p><i>– In my spare time I am a musician.</i></p> | <p><i>– I like reading fairy tales and colouring.</i></p> <p><i>– Mom does not want me to go to the kitchen; I do puzzles or embroidery; I see Walt Disney cartoons. I read the newspapers. When I am sad or angry, I try to eat. Often, I quarrel with my mom. My dad says nothing because he makes me feel more upset.</i></p> <p><i>– I see the television, I hear the music, and I pray every day. Every morning I make the beds, and I lay the table while my parents are cooking.</i></p> |
| <b>Outdoor activities</b> | <p><i>– I reload by being alone. I do yoga, I study Japanese, I sing in a choir. I do not give up my</i></p>                                                                                                                                                                                                                                                                                                   | <p><i>– I play sports, especially football and swimming. I go for walks with a company,</i></p>                                                                                                                                                                                                                                                                                                                                                                                                 |

passions.

– I like spending time with my family. I cultivate my hobbies, thanks to my wife's patience. With her, I share a love for concerts and cinema. I also cultivate my personal passions: wine and stickers collection.

– I would like to swim, to go for walks by the sea and the lake. I would like to have no responsibilities, schedules, limitations; I would like to be a little carefree.

alone or with my dog. I like going to see my favourite football team at the stadium. I play videogames and watch movies. I like going to see my favourite animal, the dolphin, at the dolphinarium.

– I have so many hobbies: dancing, singing, painting. I like art and going to the cinema and to the theater. I like reading crime novels, and I really like being with other people and playing cards, when the people around me do not fool me.

– I like going out, shopping, swimming, listening to music, drawing, cutting and pasting, sticking figurines, making decoupage.

#### Relationships

– Some people have tried to understand the condition, others have disappeared. In this case, the syndrome helped me to make a selection among the people around me.

– My father and my mother were as sorry and incredulous as I was, unable to get over it. My sister and friends supported me. My husband has shut himself off, present and absent at the same time, except for practical things.

– Grandparents have been fantastic, available, always ready to help us. Friends did not understand our situation, and our roads soon split up: social life changes radically.

– My parents are the closest and most valuable people. They are strict but affectionate and loving. I am morbid with them, and I always look for contact even if I make them angry. My brothers are also close to me. One is playful, and the other is protective, a little severe. With them, I am serene and protective.

– At school, I try to get closer to the other people, but they run away, they do not want me. Professors love me, even if with some of them, I feel I am different and not good. My parents: my biological mother did not love me, and my father hated me; my other parents love me so much.

– The people next to me are my parents and my sister, and my personal support teachers. I do not like all my educators and my classmates because they spite me, but some of them are good.

#### Work and future perspectives

Sixty-two percent of family caregivers had to change their job after the birth of their child with PWS (Table 6): more than one third left their current work, 8% changed jobs to assist the child, 8% requested a part-time job, and 3% abandoned the perspective of a career. From a gender perspective, 63% of female (mothers) and 33% of male caregivers had to change their current job to adapt to the child's condition. Forty-six percent did not discuss PWS in the workplace or discussed PWS with only their closest colleagues; 36% reported comprehensive behaviours, and 18% declared a lower understanding of PWS management necessities than for other diseases, such as cancer. Based on the narratives, work was a positive personal resource. Fifty-six percent of adults with PWS declared that they were working in jobs mainly characterised by low complexity

1  
2  
3 259 and repetitive operations and conducted in social cooperatives or centres, small companies with  
4  
5  
6 260 high corporate social responsibility, and family companies. Work is a source of pride and well-  
7  
8 261 being and a distraction from food, but episodes of irritability and aggressive behaviours have been  
9  
10  
11 262 reported.

**Table 6 – PWS and the working sphere: quotes from narratives**

|                        |                                                                                                                                                                                                                                                                                                                                                                                                                                                                                                                                                                                                                                                                                                                                                                                                                                                                                                                                                                       |
|------------------------|-----------------------------------------------------------------------------------------------------------------------------------------------------------------------------------------------------------------------------------------------------------------------------------------------------------------------------------------------------------------------------------------------------------------------------------------------------------------------------------------------------------------------------------------------------------------------------------------------------------------------------------------------------------------------------------------------------------------------------------------------------------------------------------------------------------------------------------------------------------------------------------------------------------------------------------------------------------------------|
| <b>Adults with PWS</b> | <p>– I am happy because my colleagues are great and they care about me, they are very close to me. I am glad because I like my job.</p> <p>– I deal with the press review, I answer by phone, I receive the people who come, and I do other tasks that the office managers assign me. If I am happy and motivated, I do not go looking for food. I look for food only when I am nervous. Now I have made so much progress, and therefore I do it less.</p> <p>– I often have nervous attacks, and I answer badly, offending with swear words those who make fun of me on how I do my job.</p> <p>– I work in a nursing home five days a week. I wash laundry, iron and fold the clothes of the guests. I work with a girl who follows me and teaches me many things. Every day I work with a different person, it depends on the shifts. With them, I feel good because they treat me like a normal person, and they congratulate me every time I work with them.</p> |
| <b>PWS caregivers</b>  | <p>– My colleagues firmly supported me. They gave me the priority for any personal needs, so to allow me to not leave my son and my wife alone. They were like a second family to me, they all contributed as much as they could.</p> <p>– I had to leave work. I was working in the factory eight hours a day, and it was not possible to ask for a part-time job.</p> <p>– The job was a safety valve, a place to have a normal life.</p> <p>– At work, at first, there were no changes, because I did not immediately say what was happening. I talked about it with a few trusted colleagues, who showed me great warmth and solidarity.</p>                                                                                                                                                                                                                                                                                                                      |

12  
13  
14  
15  
16  
17  
18  
19  
20  
21  
22  
23  
24  
25  
26  
27  
28  
29  
30  
31  
32  
33  
34  
35  
36  
37 263  
38  
39 264 Regarding future perspectives, PWS family caregivers hope to have long lives so that they can care  
40  
41 265 for their sons and daughters as long as possible, and they were particularly concerned with what  
42  
43  
44 266 would happen to their children without familial support (Table 7). Caregivers also addressed social  
45  
46 267 inclusion, such as social changes and openness, rather than clinical solutions to PWS. Adult  
47  
48  
49 268 participants with PWS demonstrated self-realisation through work (27%)—as underaged  
50  
51 269 participants did—and the desire to have a family (46%), recover from PWS (10%), and generally  
52  
53  
54 270 live well (14%).

**Table 7 – Living with PWS and future perspectives: quotes from narratives**

|                        |                                                                                                                                                                                                          |
|------------------------|----------------------------------------------------------------------------------------------------------------------------------------------------------------------------------------------------------|
| <b>Minors with PWS</b> | <p>– When I grow up, I want to be a professor of endocrinology to study my syndrome.</p> <p>– I want to be a vet because I love animals.</p> <p>– I want to drive an ambulance and do a lot of jobs.</p> |
| <b>Adults with PWS</b> | <p>– I want to start a family by adopting a child because I have so much love to give and being with my boyfriend. I hope to work in the same place where I currently am. I do</p>                       |

not know how to live without my parents, they help us a lot.  
 – I want to go living with the person I love the most in the world and to have children. Above all, I want to become a famous singer, and personally meet all my favourite singers. I want to get married and go to live in a beautiful house with a pool.  
 – I hope that medicine will be able to find a drug to increase satiety and to limit nervous hunger, which is unfortunately increased by the syndrome. Some moments are hard to overcome. I hope to live as well as I can with the consequences of the syndrome, and I hope that doctors will find treatments to alleviate the risks. I hope that other people can also live better.

**PWS caregivers** – I am sure that his future will be full of satisfactions. We are working to ensure him a positive future and a job that makes him happy and confident in his possibilities.  
 – I believe the future will be challenging; I hope to be wrong, but I realised that most people mind their own business. Indeed, it is painful and challenging to care for or stay close to people with this kind of pathologies. Still, perhaps if people did their part and committed themselves more to the social, the future could be different. We should learn from an early age that we need to help other people and stand by those in need.  
 – As long as we, her family, are there, I think the future is “protected”. The “after” is fearful, but I know I have to do something for her ... I owe her!

## DISCUSSION

The PRAXIS project represents the first effort to investigate the PWS illness experience in Italy through NM by simultaneously considering the perspectives of underaged and adult patients with PWS and their caregivers. The project first aimed to understand their daily life, real needs and personal resources. Fifty-five participants, namely, children, adolescents and adults with PWS, reported joy and pride in sharing their stories, also suggesting that using evocative and open words[36] in structuring illness plots can be crucial to helping people to express themselves. Moreover, the collection of 138 caregiving stories suggested a strong dedication to the survey and the need for caregivers to be listened to: They described writing as liberating, demonstrating its potential (a) to have a therapeutic effect[27, 33] and (b) to be a safe space from the attitude of passing,[40] namely, handling information considered discrediting or critical for the self to avoid social stigma. Talking about PWS emerged as a ‘taboo’. In illness-centred and sickness-centred narratives [28], caregivers encountered significant difficulties in socialising the challenges PWS imposes in daily life, as well as the pain of having a child “different” from social imagery: We identify this as a social pain that also concerns caregivers when performing familiar criticalities. Furthermore, caregivers

1  
2  
3 288 considered the project a chance to invite society to integrate people with PWS and to denounce  
4  
5  
6 289 the stigma[40] that surrounds them.  
7  
8 290 If the literature demonstrates cognitive impairment in people with PWS,[6] we would like to  
9  
10  
11 291 enrich the evidence by suggesting the consideration of the multiple intelligences[41] these people  
12  
13 292 demonstrate in their everyday experience. In line with Gardner's[41] reflection, revealing  
14  
15 293 alternatives to the standard forms of intelligence (the logical-mathematical and linguistic ones),  
16  
17  
18 294 the narratives demonstrated the constant use of visuospatial, musical, interpersonal, existential  
19  
20 295 and introspective talents, resources and capabilities. In this regard, patients with PWS have been  
21  
22  
23 296 reported to show above-average performance in several tasks implying visuospatial skills,[42]  
24  
25 297 which in the general population are linked with higher math abilities.[43] In particular, the  
26  
27  
28 298 importance of multiple intelligences emerged in food- control strategies and activities,  
29  
30 299 consequently suggesting that considering them may positively influence the overall illness  
31  
32  
33 300 experience.  
34  
35 301 Considering the second purpose of the project, specific elements emerged from the analysis of  
36  
37 302 therapeutic paths. PWS diagnosis mostly occurred up to the child's second year of life, but in some  
38  
39  
40 303 cases, a significant delay remained, particularly for those people living away from specialised  
41  
42 304 centres. Because timing is essential in PWS treatment,[9] training for neonatologists, geneticists  
43  
44  
45 305 and general paediatricians on PWS might improve early diagnosis. Moreover, the other  
46  
47 306 professionals involved also must develop or strengthen specific PWS competencies to  
48  
49  
50 307 appropriately address this condition.  
51  
52 308 The narratives demonstrated some peculiar clinical PWS characteristics, such as irritability,  
53  
54  
55 309 aggressive and obsessive-compulsive behaviour [10, 11] and food-seeking[13] behaviours. The last  
56  
57 310 resulted in the most challenges for the people with PWS and their caregivers: Food management  
58  
59 311 strategies,[44] and indoor and outdoor activities[45] and school or work schedules,[46, 47] can  
60

1  
2  
3  
4  
5  
6  
7  
8  
9  
10  
11  
12  
13  
14  
15  
16  
17  
18  
19  
20  
21  
22  
23  
24  
25  
26  
27  
28  
29  
30  
31  
32  
33  
34  
35  
36  
37  
38  
39  
40  
41  
42  
43  
44  
45  
46  
47  
48  
49  
50  
51  
52  
53  
54  
55  
56  
57  
58  
59  
60

312 help people with PWS and their caregivers improve their relationships with food and family  
313 members, enhancing overall daily life.

314 Diet management and strategies, early GH therapy, clinical and psychiatric treatments, activities in  
315 specialised or social centres, and the different professional roles involved demonstrated that a  
316 mutiprofessional approach that integrates the factors of hospital and territory is fundamental to  
317 ensure adequate treatment of PWS [17, 46, 48] and to mitigate the burden of caregiving reported  
318 in the narratives and the literature.[14-16] In particular, two related topics emerged: (a) mostly  
319 women (mothers) changed or retired from work to become a caregiver; (b) family caregivers  
320 stated their concerns regarding what will happen to their sons and daughters if no family  
321 members are available —a topic already addressed by Italian Law 112/2016, on the social  
322 inclusion and autonomy of people with disabilities. These considerations also suggest, on the one  
323 hand, that social centres and services are crucial but need to be implemented in areas that have  
324 insufficient support for people with PWS and their caregivers, and on the other hand, a focus on  
325 work policies to create autonomy and social inclusion. Overcoming economic, legal, and social  
326 barriers and improving the current service provision still represent a challenge; patient  
327 organisations and scientific societies may have a crucial role in addressing these issues.  
328 Furthermore, although a National Plan for rare diseases[49] has been developed in Italy since  
329 2013, its application in daily practice remains demanding. One possible intervention strategy to  
330 reduce the medical barriers requires universities and scientific societies to develop specific  
331 educational programs; in particular, creating a PWS national register may help to interface with  
332 similar international tools.[50]

333 The acknowledgement of the importance of multiple intelligences[41] in everyday experiences  
334 may also improve the daily and relational life of people with PWS or their caregivers, together  
335 with ameliorating the social stigma of PWS and enhancing social inclusion. Multiple intelligences

1  
2  
3 336 might also become a tool in clinical practice to better evaluate people with PWS; moreover, an  
4  
5  
6 337 evolving model for PWS care should include modern technologies, e.g. video visits, remote  
7  
8 338 monitoring, and electronic health records.[51]

9  
10 339 The participants in the project did not equally represent the different geographical areas in Italy  
11  
12  
13 340 because of the local distribution of expert centres in the management of care for PWS, and this  
14  
15 341 could be a selection bias. Furthermore, the results are specific because of (a) the voluntary nature  
16  
17  
18 342 of the project and (b) the critical difference among Italian regional healthcare systems; therefore,  
19  
20 343 further analysis is required. For people with PWS, the inclusion criterion of being able to write  
21  
22  
23 344 represented another bias.

24  
25 345 In conclusion, this NM project provides new insights into the individual and social experiences  
26  
27  
28 346 related to PWS and provides elements for improving a multidisciplinary and multiprofessional  
29  
30 347 perspectives on this condition: The social, relational, and emotional aspects of PWS crucially  
31  
32  
33 348 influence the illness experience and narratives that can foster the relationship between PWS  
34  
35 349 professionals, patients, families and the community.

### 37 350 **Acknowledgements**

38  
39  
40 351 The authors wish to thank all participants in the project, the Italian Prader–Willi Federation and  
41  
42  
43 352 the Prader–Willi Association of Lazio Region for their active contribution. Acknowledgements also  
44  
45 353 to the researchers of the Healthcare Area of ISTUD Foundation for their useful role throughout  
46  
47  
48 354 this project and to Enago ([www.enago.com](http://www.enago.com)) for the English language review.

### 50 355 **Competing interests**

51  
52 356 Authors have nothing to disclose.

### 55 357 **Funding**

56  
57 358 Sandoz S.p.A. unconditionally supported ISTUD Foundation for the realisation of the project.

58  
59  
60 359 Authors did not receive any fee.



1  
2  
3 360 **Author contributions**

4  
5  
6 361 Conceptualisation: Ragusa, Crinò, Grugni, Reale, Marini. Analysis: Reale, Fiorencis. Investigation:  
7  
8 362 Ragusa, Crinò, Grugni, Reale, Fiorencis, Licenziati, Faienza, Wasniewska, Delvecchio, Franzese,  
9  
10 363 Rutigliano, Fusilli, Corica, Campana, Greco, Chiarito, Sacco, Toscano, Marini. Methodology: Reale,  
11  
12 364 Marini. Project administration: Reale. Ragusa, Crinò, Grugni, Reale, Marini. Report visualisation:  
13  
14 365 Ragusa, Crinò, Grugni, Reale, Fiorencis, Licenziati, Faienza, Wasniewska, Delvecchio, Franzese,  
15  
16 366 Rutigliano, Fusilli, Corica, Campana, Greco, Chiarito, Sacco, Toscano, Marini. Methodology: Reale,  
17  
18 367 Marini. Writing: Fiorencis, Ragusa, Crinò, Grugni, Reale, Marini. Editing: Fiorencis.

19  
20  
21  
22 368 **Data sharing**

23  
24  
25 369 All data relevant to the project are included in the present manuscript. Original narratives are  
26  
27 370 available into Italian upon request at the email [areasanita@istud.it](mailto:areasanita@istud.it).

28  
29  
30 371 **References**

- 31  
32  
33 372 1. Butler MG, Hartin SN, Hossain WA, Manzardo AM, Kimonis V, Dykens E, Gold JA, Kim SJ,  
34  
35 373 Weisensel N, Tamura R, Miller JL, Driscoll DJ. Molecular genetic classification in Prader–  
36  
37 374 Willi syndrome: a multisite cohort study. *J Med Genet* 2019;56(3):149–53.  
38  
39  
40 375 2. Irizarry KA, Miller M, Freemark M, et al. Prader–Willi syndrome: genetics, metabolomics,  
41  
42 376 hormonal function, and new approaches to therapy. *Adv Pediatr* 2016;63(1):47–77.  
43  
44  
45 377 3. Cassidy SB, Schwartz S, Miller JL, et al. Prader–Willi syndrome. *Genet Med*. 2012;14(1):10–  
46  
47 378 26.  
48  
49  
50 379 4. Vogels A, Van Den Ende J, Keymolen K, et al. Minimum prevalence, birth incidence and  
51  
52 380 cause of death for Prader–Willi syndrome in Flanders. *European Journal of Human Genetics*  
53  
54 381 2004;12:238–40.  
55  
56  
57 382 5. Heksch R, Kamboj M, Anglin K, et al. Review of Prader–Willi syndrome: the endocrine  
58  
59 383 approach. *Transl Pediatr* 2017;6(4):274–85.

1  
2  
3  
4  
5  
6  
7  
8  
9  
10  
11  
12  
13  
14  
15  
16  
17  
18  
19  
20  
21  
22  
23  
24  
25  
26  
27  
28  
29  
30  
31  
32  
33  
34  
35  
36  
37  
38  
39  
40  
41  
42  
43  
44  
45  
46  
47  
48  
49  
50  
51  
52  
53  
54  
55  
56  
57  
58  
59  
60

- 384 6. Angulo MA, Butler MG, Cataletto ME. Prader–Willi syndrome: A review of clinical, genetic,  
and endocrine findings. *J Endocrinol. Invest* 2015;38:1249–63.
- 385  
386 7. Crinò A, Di Giorgio G, Livieri C, et al. A survey on Prader–Willi syndrome in the Italian  
population: prevalence of historical and clinical signs. *J Pediatr Endocrinol Metab*  
2009;22(10):883–93.
- 387  
388  
389 8. Hartley SL, Maclean WE Jr, Butler MG, et al. Maladaptive behaviors and risk factor among  
the genetic subtypes of Prader–Willi syndrome. *Am J Med Genet A* 2005;136(2):140–5.
- 390  
391 9. Manzardo AM, Loker J, Heinemann J, et al. Survival trends from the Prader–Willi Syndrome  
Association (USA) 40-year mortality survey. *Genet Med* 2018;20(1):24–30.
- 392  
393 10. Guinovart M, Coronas R, Caixàs A. Psychopathological disorders in Prader–Willi syndrome.  
*Endocrinol Diabetes Nutr* 2019;66(9):579–87.
- 394  
395 11. Sinnema M, Einfeld SL, Schrandt-Stumpel CT, et al. Behavioral phenotype in adults with  
Prader–Willi syndrome. *Res Dev Disabil* 2011;32(2):604–12.
- 396  
397 12. Yang L, Zhan GD, Ding JJ, et al. Psychiatric illness and intellectual disability in the Prader–  
Willi syndrome with different molecular defects—a meta analysis. *PLoS One*  
2013;8(8):e72640.
- 398  
399 13. Miller JL, Lynn CH, Driscoll DC, et al. Nutritional phases in Prader–Willi syndrome. *Am J Med*  
*Genet A* 2011; 155A(5):1040–9.
- 400  
401 14. Lanfranchi S, Vianello R. Stress, locus of control, and family cohesion and adaptability in  
parents of children with Down, Williams, Fragile X, and Prader–Willi syndromes. *Am J*  
*Intellect Dev Disabil* 2012;117(3):207–24.
- 402  
403  
404 15. Kayadjanian N, Schwartz L, Farrar E, et al. High levels of caregiver burden in Prader–Willi  
syndrome. *PLoS One* 2018;13(3): e0194655.

- 1  
2  
3 407 16. Mazaheri MM, Rae-Seebach RD, Preston HE, et al. The impact of Prader-Willi syndrome on  
4  
5  
6 408 the family's quality of life and caregiving, and the unaffected siblings' psychosocial  
7  
8 409 adjustment. *J Intellect Disabil Res* 2013;57(9):861–73.  
9
- 10  
11 410 17. Crinò A, Fintini D, Bocchini S, et al. Obesity management in Prader–Willi Syndrome: current  
12  
13 411 perspectives. *Diabetes Metab Syndr Obes* 2018;11:579–93.  
14
- 15 412 18. Gunay-Aygun M, Schwartz S, Heeger S, et al. SB. The changing purpose of Prader–Willi  
16  
17  
18 413 syndrome clinical diagnostic criteria and proposed revised criteria. *Pediatrics*  
19  
20 414 2001;108:e92.  
21
- 22  
23 415 19. Hartin SN, Hossain WA, Francis D, et al. Analysis of the Prader–Willi syndrome imprinting  
24  
25 416 center using droplet digital PCR and next-generation whole-exome sequencing. *Mol Genet*  
26  
27 417 *Genomic Med* 2019;7(4):e00575.  
28  
29
- 30 418 20. Grugni G, Marzullo P. Diagnosis and treatment of GH deficiency in Prader–Willi syndrome.  
31  
32 419 *Best Pract Res Clin Endocrinol Metab* 2016;30(6):785–94.  
33  
34
- 35 420 21. Deal CL, Tony M, HoÈybye C, et al. Growth Hormone Research Society workshop summary:  
36  
37 421 consensus guidelines for recombinant human growth hormone therapy in Prader–Willi  
38  
39  
40 422 syndrome. *J Clin Endocrinol Metab* 2013;98(6):E1072–87.  
41
- 42 423 22. Sanchez-Ortiga R, Klibanski A, Tritos NA. Effects of recombinant human growth hormone  
43  
44  
45 424 therapy in adults with Prader–Willi syndrome: a meta-analysis. *Clin Endocrinol (Oxf)* 2012;  
46  
47 425 77(1):86–93.  
48
- 49  
50 426 23. Moix Gil E, Giménez-Palop P, Caixàs A. Treatment with growth hormone in the prader-willi  
51  
52 427 syndrome. *Endocrinol Diabetes Nutr* 2018;65(4):229–36.  
53
- 54 428 24. Bakker NE, Siemensma EP, van Rijn M, et al. Beneficial effect of growth hormone treatment  
55  
56  
57 429 on health-related quality of life in children with Prader–Willi Syndrome: A randomized  
58  
59 430 controlled trial and longitudinal study. *Horm Res Paediatr* 2015;84(4):231–9.  
60

- 1  
2  
3 431 25. Bertella L, Mori I, Grugni G, et al. Quality of life and psychological well-being in GH-treated,  
4  
5  
6 432 adult patients with PWS: a longitudinal study. *J Intellect Disabil Res* 2007 ;51(Pt 4):302–11.  
7  
8 433 26. Greenhalgh T. Cultural contexts of health: the use of narrative research in the health  
9  
10 434 sector. Copenhagen: WHO Regional Office for Europe; 2016, Health Evidence Network  
11  
12 (HEN) synthesis report 49. Available from:  
13 435 [http://www.euro.who.int/  
14  
15 436 data/assets/pdf\\_file/0004/317623/HEN-synthesis-report-  
16  
17 437 49.pdf](http://www.euro.who.int/data/assets/pdf_file/0004/317623/HEN-synthesis-report-49.pdf)  
18  
19  
20 438 27. Marini MG. Narrative Medicine: Bridging the gap between evidence-based care and  
21  
22 medical humanities. London: Springer International Publishing, 2016.  
23 439  
24  
25 440 28. Kleinman A. The illness narrative, suffering and healing the human condition. New York:  
26  
27 Basic Book, 1989.  
28 441  
29  
30 442 29. Greenhalgh T, Hurwitz B. Why study narrative? In: Greenhalgh T, Hurwitz B, editors.  
31  
32 443 Narrative based medicine: dialogue and discourse in clinical practice. *BMJ*  
33  
34 1999;318(7175):48–50.  
35 444  
36  
37 445 30. Banfi P, Cappuccio A, Latella ME, et al. Narrative medicine to improve the management and  
38  
39 quality of life of patients with COPD: the first experience applying parallel chart in Italy. *Int*  
40 446  
41 *J Chron Obstruct Pulmon Dis* 2018;13:287–97.  
42 447  
43  
44 448 31. Marini MG, Chesi P, Mazzanti L, Guazzarotti L, et al. Stories of experiences of care for  
45  
46 growth hormone deficiency: the CRESCERE project. *Future Sci OA* 2016;2(1):FSO82.  
47 449  
48  
49 450 32. De Vincentis G, Monari F, Baldari S, et al. Narrative medicine in metastatic prostate cancer  
50  
51 reveals ways to improve patient awareness & quality of care. *Future Oncol*  
52 451  
53 2018;14(27):2821–32.  
54 452  
55  
56 453 33. Charon R. The patient-physician relationship. Narrative Medicine: a model for empathy,  
57  
58 reflection, profession, and trust. *JAMA* 2001;286(15):1897–902.  
59 454  
60

- 1  
2  
3 455 34. Marini MG, Languages of Care in Narrative Medicine. Words, Space and Time in the  
4  
5  
6 456 Healthcare Ecosystem. London: Springer International Publishing, 2019.  
7  
8 457 35. Reid K, Soundy A. A Qualitative Study Examining the Illness Narrative Master Plots of  
9  
10  
11 458 People with Head and Neck Cancer. *Behav Sci* 2019;9:110.  
12  
13 459 36. Peeters B, Marini M. Narrative Medicine Across Languages and Cultures: Using Minimal  
14  
15 460 English for Increased Comparability of Patients' Narratives. In Cliff Goddard, ed. Minimal  
16  
17  
18 461 English for a Global World: Improved Communication Using Fewer Words, Palgrave  
19  
20 462 Macmillan, Basingstoke, United Kingdom, pp. 259–86. 2018.  
21  
22  
23 463 37. Personal data code protection. Legislat. Decree no. 196 of 30 June 2003. Published on the  
24  
25 464 Italian Official Journal n. 174, July 29<sup>th</sup>, 2003, Supplementary n. 123. Available at  
26  
27  
28 465 [http://194.242.234.211/documents/10160/2012405/Personal+Data+Protection+Code+-](http://194.242.234.211/documents/10160/2012405/Personal+Data+Protection+Code+-+Legislat.+Decree+no.196+of+30+June+2003.pdf)  
29  
30 466 [+Legislat.+Decree+no.196+of+30+June+2003.pdf](http://194.242.234.211/documents/10160/2012405/Personal+Data+Protection+Code+-+Legislat.+Decree+no.196+of+30+June+2003.pdf)  
31  
32  
33 467 38. Bazeley P, Jackson K. Qualitative Data Analysis with NVivo. London: Sage, 2013.  
34  
35 468 39. O'Brien BC, Harris IB, Beckman TJ, et al. Standards for reporting qualitative research: a  
36  
37 469 synthesis of recommendations. *Acad Med* 2014;89(9):1245–51  
38  
39  
40 470 40. Goffman E. Stigma. London: Penguin, 1963.  
41  
42 471 41. Gardner H. Frames of mind: The theory of multiple intelligences. New York: Basic Books,  
43  
44  
45 472 1983.  
46  
47 473 42. Semenza C, Pignatti R, Bertella L, et al. Genetics and mathematics: evidence from Prader–  
48  
49  
50 474 Willi syndrome. *Neuropsychologia* 2008;46(1):206–12.  
51  
52 475 43. Fanari R, Meloni C, Massidda D. Visual and spatial working memory abilities predict early  
53  
54  
55 476 math skills: a longitudinal study. *Fron Psychol* 2019;10:2460.  
56  
57 477 44. Mackenzie ML, Triador L, Gill JK, et al. Dietary intake in youth with prader-willi syndrome.  
58  
59 478 *Am J Med Genet A* 2018 Nov;176(11):2309-17.  
60

1  
2  
3  
4  
5  
6  
7  
8  
9  
10  
11  
12  
13  
14  
15  
16  
17  
18  
19  
20  
21  
22  
23  
24  
25  
26  
27  
28  
29  
30  
31  
32  
33  
34  
35  
36  
37  
38  
39  
40  
41  
42  
43  
44  
45  
46  
47  
48  
49  
50  
51  
52  
53  
54  
55  
56  
57  
58  
59  
60

- 479 45. Rubin DA, Wilson KS, Dumont-Driscoll M, et al. Effectiveness of a Parent-led Physical  
480 Activity Intervention in Youth with Obesity. *Med Sci Sports Exerc* 2019;51(4):805–13.
- 481 46. Duis J, van Wattum PJ, Scheimann A, et al. A multidisciplinary approach to the clinical  
482 management of Prader–Willi syndrome. *Mol Genet Genomic Med* 2019;7(3):e514.
- 483 47. Vogels A, Scheermeyer E. Coordination of the multidisciplinary treatment efforts. In:  
484 Hoybye C, editor. Prader–Willi Syndrome. New York: Nova Science Publishers; 2013:229–  
485 54.
- 486 48. Mackay J, McCallum Z, Ambler GR, et al. Requirements for improving health and well-being  
487 of children with Prader–Willi syndrome and their families. *J Paediatr Child Health*  
488 2019;55(9):1029–37.
- 489 49. Italian Ministry of Health. Piano Nazionale delle Malattie Rare 2013-2016. Rome: Ministry  
490 of Health; 2013. Available at:  
491 [http://www.europlanproject.eu/DocumentationAttachment/Italian%20National%20Plan%  
492 20for%20Rare%20Diseases%202013-2016%20-%20eng%20\(en\)%20%20%5Bunofficial%20version%20by%20EUROPLAN%5D.pdf](http://www.europlanproject.eu/DocumentationAttachment/Italian%20National%20Plan%20for%20Rare%20Diseases%202013-2016%20-%20eng%20(en)%20%20%5Bunofficial%20version%20by%20EUROPLAN%5D.pdf)
- 494 50. Ali SR, Bryce J, Cools M et al. The current landscape of European registries for rare  
495 endocrine conditions. *Eur J Endocrinol*. 2019 Jan 1;180(1):89-98.
- 496 51. Augustine EF, Dorsey ER, Saltonstall PL. The Care Continuum: An Evolving Model for Care  
497 and Research in Rare Diseases. *Pediatrics*. 2017 Sep;140(3).

### Figure legend

Figure 1 – Age of children with PWS at diagnosis

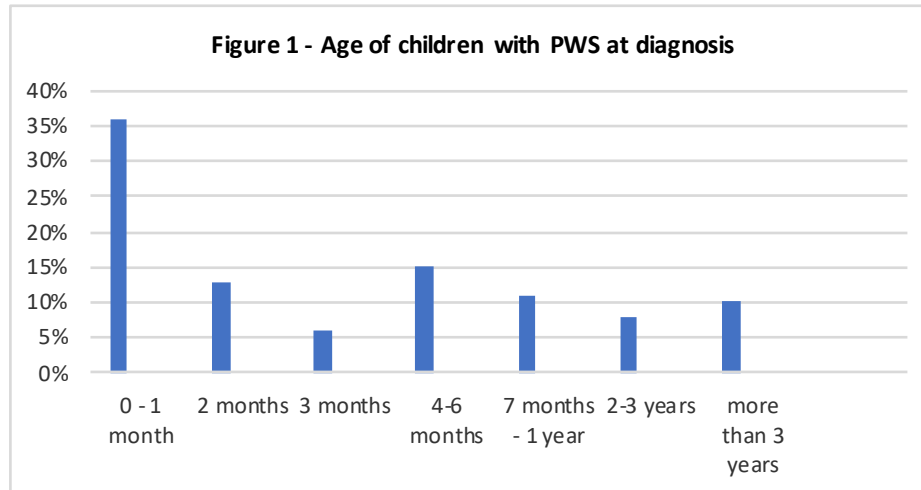

## Supplement 1

### Medical centres for paediatric and adult patients of the Italian Network for Rare Disease

OASI Maria SS., Research Institute, Troina (Enna), Italy

Bambino Gesù Paediatric Hospital, Research Institute, Palidoro (Rome), Italy

Istituto Auxologico Italiano, Research Institute, Piancavallo (Oggebbio, Verbania), Italy

Obesity and Endocrine Disease Unit, Department of Neuroscience, Santobono-Pausilipon

Children's Hospital, Naples, Italy

Department of Biomedical Sciences and Human Oncology, University of Bari "A. Moro", Bari, Italy

Department of Human Pathology of Adulthood and Childhood "G.Barresi", University of Messina, Italy

Metabolic Diseases, Clinical Genetics and Diabetology Unit, Giovanni XXIII Children's Hospital, Bari, Italy

Department of Translational Sciences, University Federico II, Naples, Italy

Department of Paediatrics, Casa Sollievo della Sofferenza Research Institute, San Giovanni Rotondo (Foggia), Italy

Neonatology Unit, Spirito Santo Hospital, Pescara, Italy



## Supplement 2

### Illness plot addressed to underaged people with PWS

Hi! Can you tell us about yourself? [...] May you introduce yourself and tell us about your life [...]. How do you feel with your friends [...], your schoolmates [...], and teachers? [...] You know that eating too much is not good for you: what do you do for not eating too much? [...] How do you feel with your family? [...] Can you tell us about your visits to the doctors? [...] What is your favorite game? [...] What will you do when you grow up? [...]

Thank you for the time and energy you dedicated. One last question:

How did you feel in narrating your experience? [...]

### Illness plot addressed to adult people with PWS

I introduce myself [...]. I feel [...]; at home [...]; at work [...]. The people next to me [...]. The food [...]. The treatments [...]. What I like to do [...]. For me, I think of a future [...].

Thank you for the time and energy you dedicated. One last question:

How did you feel in narrating your experience? [...]

### Illness plot addressed to caregivers of people with PWS

When I felt the first signs that something was going wrong [...] I feel [...]. They told us that it was [...]. The hospitals I visited, the professionals I met [...]. That period at home [...], at work [...]. The people next to me [...]. People around the person with PWS [...]. Food [...], and treatments [...]. Today the person with PWS [...], and treatments [...]; I feel [...]. At home, people with PWS [...]. Outside domestic context, the person with PWS [...]. What I like to do [...]; what the person with PWS likes, beyond food [...]. My life at home is [...]; the food [...]. I look at the person with PWS and I think for her/him a future [...], and for me I imagine a future [...].

1  
2  
3  
4  
5  
6  
7  
8  
9  
10  
11  
12  
13  
14  
15  
16  
17  
18  
19  
20  
21  
22  
23  
24  
25  
26  
27  
28  
29  
30  
31  
32  
33  
34  
35  
36  
37  
38  
39  
40  
41  
42  
43  
44  
45  
46  
47  
48  
49  
50  
51  
52  
53  
54  
55  
56  
57  
58  
59  
60

Thank you for the time and energy you dedicated. One last question:

How did you feel in narrating your experience? [...]

For peer review only

# Reporting checklist for qualitative study.

Based on the SRQR guidelines.

## Instructions to authors

Complete this checklist by entering the page numbers from your manuscript where readers will find each of the items listed below.

Your article may not currently address all the items on the checklist. Please modify your text to include the missing information. If you are certain that an item does not apply, please write "n/a" and provide a short explanation.

Upload your completed checklist as an extra file when you submit to a journal.

In your methods section, say that you used the SRQR reporting guidelines, and cite them as:

O'Brien BC, Harris IB, Beckman TJ, Reed DA, Cook DA. Standards for reporting qualitative research: a synthesis of recommendations. *Acad Med.* 2014;89(9):1245-1251.

|                              | Reporting Item                                                                                                                                                                                                                                          | Page Number |
|------------------------------|---------------------------------------------------------------------------------------------------------------------------------------------------------------------------------------------------------------------------------------------------------|-------------|
| <b>Title</b>                 |                                                                                                                                                                                                                                                         |             |
|                              | <a href="#">#1</a> Concise description of the nature and topic of the study identifying the study as qualitative or indicating the approach (e.g. ethnography, grounded theory) or data collection methods (e.g. interview, focus group) is recommended | 1           |
| <b>Abstract</b>              |                                                                                                                                                                                                                                                         |             |
|                              | <a href="#">#2</a> Summary of the key elements of the study using the abstract format of the intended publication; typically includes background, purpose, methods, results and conclusions                                                             | 2           |
| <b>Introduction</b>          |                                                                                                                                                                                                                                                         |             |
| Problem formulation          | <a href="#">#3</a> Description and significance of the problem / phenomenon studied: review of relevant theory and empirical work; problem statement                                                                                                    | 3-4         |
| Purpose or research question | <a href="#">#4</a> Purpose of the study and specific objectives or questions                                                                                                                                                                            | 5           |

## 1 **Methods**

|    |                              |                     |                                                                 |
|----|------------------------------|---------------------|-----------------------------------------------------------------|
| 2  |                              |                     |                                                                 |
| 3  | Qualitative approach and     | <a href="#">#5</a>  | Qualitative approach (e.g. ethnography, grounded theory, case   |
| 4  | research paradigm            |                     | study, phenomenology, narrative research) and guiding theory    |
| 5  |                              |                     | if appropriate; identifying the research paradigm (e.g.         |
| 6  |                              |                     | postpositivist, constructivist / interpretivist) is also        |
| 7  |                              |                     | recommended; rationale. The rationale should briefly discuss    |
| 8  |                              |                     | the justification for choosing that theory, approach, method or |
| 9  |                              |                     | technique rather than other options available; the assumptions  |
| 10 |                              |                     | and limitations implicit in those choices and how those         |
| 11 |                              |                     | choices influence study conclusions and transferability. As     |
| 12 |                              |                     | appropriate the rationale for several items might be discussed  |
| 13 |                              |                     | together.                                                       |
| 14 |                              |                     |                                                                 |
| 15 |                              |                     |                                                                 |
| 16 |                              |                     |                                                                 |
| 17 |                              |                     |                                                                 |
| 18 |                              |                     |                                                                 |
| 19 |                              |                     |                                                                 |
| 20 | Researcher characteristics   | <a href="#">#6</a>  | Researchers' characteristics that may influence the research,   |
| 21 | and reflexivity              |                     | including personal attributes, qualifications / experience,     |
| 22 |                              |                     | relationship with participants, assumptions and / or            |
| 23 |                              |                     | presuppositions; potential or actual interaction between        |
| 24 |                              |                     | researchers' characteristics and the research questions,        |
| 25 |                              |                     | approach, methods, results and / or transferability             |
| 26 |                              |                     |                                                                 |
| 27 |                              |                     |                                                                 |
| 28 |                              |                     |                                                                 |
| 29 |                              |                     |                                                                 |
| 30 | Context                      | <a href="#">#7</a>  | Setting / site and salient contextual factors; rationale        |
| 31 |                              |                     |                                                                 |
| 32 |                              |                     |                                                                 |
| 33 | Sampling strategy            | <a href="#">#8</a>  | How and why research participants, documents, or events         |
| 34 |                              |                     | were selected; criteria for deciding when no further sampling   |
| 35 |                              |                     | was necessary (e.g. sampling saturation); rationale             |
| 36 |                              |                     |                                                                 |
| 37 |                              |                     |                                                                 |
| 38 | Ethical issues pertaining to | <a href="#">#9</a>  | Documentation of approval by an appropriate ethics review       |
| 39 | human subjects               |                     | board and participant consent, or explanation for lack thereof; |
| 40 |                              |                     | other confidentiality and data security issues                  |
| 41 |                              |                     |                                                                 |
| 42 |                              |                     |                                                                 |
| 43 | Data collection methods      | <a href="#">#10</a> | Types of data collected; details of data collection procedures  |
| 44 |                              |                     | including (as appropriate) start and stop dates of data         |
| 45 |                              |                     | collection and analysis, iterative process, triangulation of    |
| 46 |                              |                     | sources / methods, and modification of procedures in response   |
| 47 |                              |                     | to evolving study findings; rationale                           |
| 48 |                              |                     |                                                                 |
| 49 |                              |                     |                                                                 |
| 50 |                              |                     |                                                                 |
| 51 | Data collection instruments  | <a href="#">#11</a> | Description of instruments (e.g. interview guides,              |
| 52 | and technologies             |                     | questionnaires) and devices (e.g. audio recorders) used for     |
| 53 |                              |                     | data collection; if / how the instruments(s) changed over the   |
| 54 |                              |                     | course of the study                                             |
| 55 |                              |                     |                                                                 |
| 56 |                              |                     |                                                                 |
| 57 |                              |                     |                                                                 |
| 58 |                              |                     |                                                                 |
| 59 |                              |                     |                                                                 |
| 60 |                              |                     |                                                                 |

|    |                                                                                              |                     |                                                                                                                                                                                                                                                                                                          |       |
|----|----------------------------------------------------------------------------------------------|---------------------|----------------------------------------------------------------------------------------------------------------------------------------------------------------------------------------------------------------------------------------------------------------------------------------------------------|-------|
| 1  | Units of study                                                                               | <a href="#">#12</a> | Number and relevant characteristics of participants, documents, or events included in the study; level of participation (could be reported in results)                                                                                                                                                   | 9     |
| 2  |                                                                                              |                     |                                                                                                                                                                                                                                                                                                          |       |
| 3  |                                                                                              |                     |                                                                                                                                                                                                                                                                                                          |       |
| 4  |                                                                                              |                     |                                                                                                                                                                                                                                                                                                          |       |
| 5  |                                                                                              |                     |                                                                                                                                                                                                                                                                                                          |       |
| 6  | Data processing                                                                              | <a href="#">#13</a> | Methods for processing data prior to and during analysis, including transcription, data entry, data management and security, verification of data integrity, data coding, and anonymisation / deidentification of excerpts                                                                               | 8     |
| 7  |                                                                                              |                     |                                                                                                                                                                                                                                                                                                          |       |
| 8  |                                                                                              |                     |                                                                                                                                                                                                                                                                                                          |       |
| 9  |                                                                                              |                     |                                                                                                                                                                                                                                                                                                          |       |
| 10 |                                                                                              |                     |                                                                                                                                                                                                                                                                                                          |       |
| 11 |                                                                                              |                     |                                                                                                                                                                                                                                                                                                          |       |
| 12 |                                                                                              |                     |                                                                                                                                                                                                                                                                                                          |       |
| 13 | Data analysis                                                                                | <a href="#">#14</a> | Process by which inferences, themes, etc. were identified and developed, including the researchers involved in data analysis; usually references a specific paradigm or approach; rationale                                                                                                              | 8     |
| 14 |                                                                                              |                     |                                                                                                                                                                                                                                                                                                          |       |
| 15 |                                                                                              |                     |                                                                                                                                                                                                                                                                                                          |       |
| 16 |                                                                                              |                     |                                                                                                                                                                                                                                                                                                          |       |
| 17 |                                                                                              |                     |                                                                                                                                                                                                                                                                                                          |       |
| 18 | Techniques to enhance trustworthiness                                                        | <a href="#">#15</a> | Techniques to enhance trustworthiness and credibility of data analysis (e.g. member checking, audit trail, triangulation); rationale                                                                                                                                                                     | 8     |
| 19 |                                                                                              |                     |                                                                                                                                                                                                                                                                                                          |       |
| 20 |                                                                                              |                     |                                                                                                                                                                                                                                                                                                          |       |
| 21 |                                                                                              |                     |                                                                                                                                                                                                                                                                                                          |       |
| 22 |                                                                                              |                     |                                                                                                                                                                                                                                                                                                          |       |
| 23 |                                                                                              |                     |                                                                                                                                                                                                                                                                                                          |       |
| 24 | <b>Results/findings</b>                                                                      |                     |                                                                                                                                                                                                                                                                                                          |       |
| 25 |                                                                                              |                     |                                                                                                                                                                                                                                                                                                          |       |
| 26 | Syntheses and interpretation                                                                 | <a href="#">#16</a> | Main findings (e.g. interpretations, inferences, and themes); might include development of a theory or model, or integration with prior research or theory                                                                                                                                               | 9-10  |
| 27 |                                                                                              |                     |                                                                                                                                                                                                                                                                                                          |       |
| 28 |                                                                                              |                     |                                                                                                                                                                                                                                                                                                          |       |
| 29 |                                                                                              |                     |                                                                                                                                                                                                                                                                                                          |       |
| 30 |                                                                                              |                     |                                                                                                                                                                                                                                                                                                          |       |
| 31 | Links to empirical data                                                                      | <a href="#">#17</a> | Evidence (e.g. quotes, field notes, text excerpts, photographs) to substantiate analytic findings                                                                                                                                                                                                        | 10-16 |
| 32 |                                                                                              |                     |                                                                                                                                                                                                                                                                                                          |       |
| 33 |                                                                                              |                     |                                                                                                                                                                                                                                                                                                          |       |
| 34 |                                                                                              |                     |                                                                                                                                                                                                                                                                                                          |       |
| 35 | <b>Discussion</b>                                                                            |                     |                                                                                                                                                                                                                                                                                                          |       |
| 36 |                                                                                              |                     |                                                                                                                                                                                                                                                                                                          |       |
| 37 |                                                                                              |                     |                                                                                                                                                                                                                                                                                                          |       |
| 38 | Intergration with prior work, implications, transferability and contribution(s) to the field | <a href="#">#18</a> | Short summary of main findings; explanation of how findings and conclusions connect to, support, elaborate on, or challenge conclusions of earlier scholarship; discussion of scope of application / generalizability; identification of unique contributions(s) to scholarship in a discipline or field | 16-19 |
| 39 |                                                                                              |                     |                                                                                                                                                                                                                                                                                                          |       |
| 40 |                                                                                              |                     |                                                                                                                                                                                                                                                                                                          |       |
| 41 |                                                                                              |                     |                                                                                                                                                                                                                                                                                                          |       |
| 42 |                                                                                              |                     |                                                                                                                                                                                                                                                                                                          |       |
| 43 |                                                                                              |                     |                                                                                                                                                                                                                                                                                                          |       |
| 44 |                                                                                              |                     |                                                                                                                                                                                                                                                                                                          |       |
| 45 |                                                                                              |                     |                                                                                                                                                                                                                                                                                                          |       |
| 46 | Limitations                                                                                  | <a href="#">#19</a> | Trustworthiness and limitations of findings                                                                                                                                                                                                                                                              | 19    |
| 47 |                                                                                              |                     |                                                                                                                                                                                                                                                                                                          |       |
| 48 | <b>Other</b>                                                                                 |                     |                                                                                                                                                                                                                                                                                                          |       |
| 49 |                                                                                              |                     |                                                                                                                                                                                                                                                                                                          |       |
| 50 |                                                                                              |                     |                                                                                                                                                                                                                                                                                                          |       |
| 51 | Conflicts of interest                                                                        | <a href="#">#20</a> | Potential sources of influence of perceived influence on study conduct and conclusions; how these were managed                                                                                                                                                                                           | 19    |
| 52 |                                                                                              |                     |                                                                                                                                                                                                                                                                                                          |       |
| 53 |                                                                                              |                     |                                                                                                                                                                                                                                                                                                          |       |
| 54 | Funding                                                                                      | <a href="#">#21</a> | Sources of funding and other support; role of funders in data collection, interpretation and reporting                                                                                                                                                                                                   | 19    |
| 55 |                                                                                              |                     |                                                                                                                                                                                                                                                                                                          |       |
| 56 |                                                                                              |                     |                                                                                                                                                                                                                                                                                                          |       |
| 57 |                                                                                              |                     |                                                                                                                                                                                                                                                                                                          |       |
| 58 |                                                                                              |                     |                                                                                                                                                                                                                                                                                                          |       |
| 59 |                                                                                              |                     |                                                                                                                                                                                                                                                                                                          |       |
| 60 |                                                                                              |                     |                                                                                                                                                                                                                                                                                                          |       |

1 None The SRQR checklist is distributed with permission of Wolters Kluwer © 2014 by the Association of  
2 American Medical Colleges. This checklist can be completed online using <https://www.goodreports.org/>, a tool  
3 made by the [EQUATOR Network](#) in collaboration with [Penelope.ai](#)  
4  
5  
6  
7  
8  
9  
10  
11  
12  
13  
14  
15  
16  
17  
18  
19  
20  
21  
22  
23  
24  
25  
26  
27  
28  
29  
30  
31  
32  
33  
34  
35  
36  
37  
38  
39  
40  
41  
42  
43  
44  
45  
46  
47  
48  
49  
50  
51  
52  
53  
54  
55  
56  
57  
58  
59  
60

For peer review only

# BMJ Open

## Caring and living with Prader-Willi syndrome in Italy: integrating children's, adults' and parents' experiences through a multicentre Narrative Medicine research.

|                                 |                                                                                                                                                                                                                                                                                                                                                                                                                                                                                                                                                                                                                                                                                                                                                                                                                                                                                                                                                                                                                                                                                                                                                                                                                                                                                                                                                                                                                                                                                                                                                                                                                                                                                    |
|---------------------------------|------------------------------------------------------------------------------------------------------------------------------------------------------------------------------------------------------------------------------------------------------------------------------------------------------------------------------------------------------------------------------------------------------------------------------------------------------------------------------------------------------------------------------------------------------------------------------------------------------------------------------------------------------------------------------------------------------------------------------------------------------------------------------------------------------------------------------------------------------------------------------------------------------------------------------------------------------------------------------------------------------------------------------------------------------------------------------------------------------------------------------------------------------------------------------------------------------------------------------------------------------------------------------------------------------------------------------------------------------------------------------------------------------------------------------------------------------------------------------------------------------------------------------------------------------------------------------------------------------------------------------------------------------------------------------------|
| Journal:                        | <i>BMJ Open</i>                                                                                                                                                                                                                                                                                                                                                                                                                                                                                                                                                                                                                                                                                                                                                                                                                                                                                                                                                                                                                                                                                                                                                                                                                                                                                                                                                                                                                                                                                                                                                                                                                                                                    |
| Manuscript ID                   | bmjopen-2019-036502.R2                                                                                                                                                                                                                                                                                                                                                                                                                                                                                                                                                                                                                                                                                                                                                                                                                                                                                                                                                                                                                                                                                                                                                                                                                                                                                                                                                                                                                                                                                                                                                                                                                                                             |
| Article Type:                   | Original research                                                                                                                                                                                                                                                                                                                                                                                                                                                                                                                                                                                                                                                                                                                                                                                                                                                                                                                                                                                                                                                                                                                                                                                                                                                                                                                                                                                                                                                                                                                                                                                                                                                                  |
| Date Submitted by the Author:   | 16-Jun-2020                                                                                                                                                                                                                                                                                                                                                                                                                                                                                                                                                                                                                                                                                                                                                                                                                                                                                                                                                                                                                                                                                                                                                                                                                                                                                                                                                                                                                                                                                                                                                                                                                                                                        |
| Complete List of Authors:       | Ragusa, Letizia; OASI Maria SS., Research Institute Crinò, Antonio; Bambino Gesù Paediatric Hospital - Palidoro, Research Institute<br>Grugni, Graziano; Istituto Auxologico Italiano , Department of Auxology Reale, Luigi; ISTUD Foundation<br>Fiorencis, Alessandra; Fondazione ISTUD, Licenziati, Maria Rosaria; Obesity and Endocrine Disease Unit, Department of Neuroscience, Santobono-Pausilipon Children's Hospital Faenza, MF; Università degli Studi di Bari Aldo Moro, Department of Biomedical Sciences and Human Oncology, Pediatrics Unit Wasniewska, Malgorzata; Department of Human Pathology of Adulthood and Childhood "G.Barresi", University of Messina<br>Delvecchio, Maurizio; Metabolic Diseases, Clinical Genetics and Diabetology Unit, Giovanni XXIII Children's Hospital Franzese, Adriana; University of Naples Federico II Department of Translational Medical Sciences<br>Rutigliano, Irene; Department of Pediatrics, IRCCS Casa Sollievo della Sofferenza<br>Fusilli, Paola; UOC Neonatologia, Ospedale "Spirito Santo"<br>Corica, Domenico; Department of Human Pathology of Adulthood and Childhood "G.Barresi"<br>Campana, Giuseppina; Obesity and Endocrine Disease Unit, Department of Neuroscience, Santobono-Pausilipon Children's Hospital Greco, Donatella; , OASI Maria SS., Research Institute Chiarito, Mariangela; Department of Biomedical Sciences and Human Oncology, University of Bari "A. Moro"<br>Sacco, Michele; Department of Pediatrics, IRCCS Casa Sollievo della Sofferenza<br>Toscano, Silvia; Department of Translational Sciences, University Federico II<br>Marini, Maria Giulia; Fondazione ISTUD, Healthcare Area |
| <b>Primary Subject Heading</b>: | Qualitative research                                                                                                                                                                                                                                                                                                                                                                                                                                                                                                                                                                                                                                                                                                                                                                                                                                                                                                                                                                                                                                                                                                                                                                                                                                                                                                                                                                                                                                                                                                                                                                                                                                                               |
| Secondary Subject Heading:      | Paediatrics, Diabetes and endocrinology                                                                                                                                                                                                                                                                                                                                                                                                                                                                                                                                                                                                                                                                                                                                                                                                                                                                                                                                                                                                                                                                                                                                                                                                                                                                                                                                                                                                                                                                                                                                                                                                                                            |
| Keywords:                       | QUALITATIVE RESEARCH, Paediatric endocrinology < DIABETES & ENDOCRINOLOGY, Paediatric clinical genetics & dysmorphology < GENETICS, Eating disorders < PSYCHIATRY                                                                                                                                                                                                                                                                                                                                                                                                                                                                                                                                                                                                                                                                                                                                                                                                                                                                                                                                                                                                                                                                                                                                                                                                                                                                                                                                                                                                                                                                                                                  |

1  
2  
3  
4  
5  
6  
7  
8  
9  
10  
11  
12  
13  
14  
15  
16  
17  
18  
19  
20  
21  
22  
23  
24  
25  
26  
27  
28  
29  
30  
31  
32  
33  
34  
35  
36  
37  
38  
39  
40  
41  
42  
43  
44  
45  
46  
47  
48  
49  
50  
51  
52  
53  
54  
55  
56  
57  
58  
59  
60



SCHOLARONE™  
Manuscripts





I, the Submitting Author has the right to grant and does grant on behalf of all authors of the Work (as defined in the below author licence), an exclusive licence and/or a non-exclusive licence for contributions from authors who are: i) UK Crown employees; ii) where BMJ has agreed a CC-BY licence shall apply, and/or iii) in accordance with the terms applicable for US Federal Government officers or employees acting as part of their official duties; on a worldwide, perpetual, irrevocable, royalty-free basis to BMJ Publishing Group Ltd ("BMJ") its licensees and where the relevant Journal is co-owned by BMJ to the co-owners of the Journal, to publish the Work in this journal and any other BMJ products and to exploit all rights, as set out in our [licence](#).

The Submitting Author accepts and understands that any supply made under these terms is made by BMJ to the Submitting Author unless you are acting as an employee on behalf of your employer or a postgraduate student of an affiliated institution which is paying any applicable article publishing charge ("APC") for Open Access articles. Where the Submitting Author wishes to make the Work available on an Open Access basis (and intends to pay the relevant APC), the terms of reuse of such Open Access shall be governed by a Creative Commons licence – details of these licences and which [Creative Commons](#) licence will apply to this Work are set out in our licence referred to above.

Other than as permitted in any relevant BMJ Author's Self Archiving Policies, I confirm this Work has not been accepted for publication elsewhere, is not being considered for publication elsewhere and does not duplicate material already published. I confirm all authors consent to publication of this Work and authorise the granting of this licence.

1  
2  
3  
4 1 **Caring and living with Prader–Willi syndrome in Italy: integrating**  
5  
6  
7 2 **children’s, adults’ and parents’ experiences through a multicentre**  
8  
9  
10 3 **Narrative Medicine research**

11  
12  
13 4 Letizia Ragusa<sup>1</sup>, Antonio Crinò<sup>2</sup>, Graziano Grugni<sup>3</sup>, Luigi Reale<sup>4</sup>, Alessandra Fiorencis<sup>4</sup>, Maria  
14  
15 5 Rosaria Licenziati<sup>5</sup>, Maria Felicia Faienza<sup>6</sup>, Malgorzata Wasniewska<sup>7</sup>, Maurizio Delvecchio<sup>8</sup>, Adriana  
16  
17 6 Franzese<sup>9</sup>, Irene Rutigliano<sup>10</sup>, Paola Fusilli<sup>11</sup>, Domenico Corica<sup>7</sup>, Giuseppina Campana<sup>5</sup>, Donatella  
18  
19 7 Greco<sup>1</sup>, Mariangela Chiarito<sup>6</sup>, Michele Sacco<sup>10</sup>, Silvia Toscano<sup>9</sup>, Maria Giulia Marini<sup>4</sup>

20  
21  
22  
23 8 <sup>1</sup> *Oasi Maria SS., Research Institute, Troina (Enna), Italy.*

24  
25 9 <sup>2</sup> *Bambino Gesù Paediatric Hospital, Research Institute, Palidoro (Rome), Italy.*

26  
27 10 <sup>3</sup> *Istituto Auxologico Italiano, Research Institute, Piancavallo (Oggebbio, Verbania), Italy.*

28  
29 11 <sup>4</sup> *ISTUD Foundation, Healthcare Area, Baveno (Verbania), Italy.*

30  
31 12 <sup>5</sup> *Obesity and Endocrine Disease Unit, Department of Neuroscience, Santobono-Pausilipon Children’s Hospital, Naples,*  
32  
33 13 *Italy.*

34  
35 14 <sup>6</sup> *Department of Biomedical Sciences and Human Oncology, University of Bari "A. Moro", Bari. Italy.*

36  
37 15 <sup>7</sup> *Department of Human Pathology of Adulthood and Childhood "G. Barresi", University of Messina, Italy.*

38  
39 16 <sup>8</sup> *Metabolic Diseases, Clinical Genetics and Diabetology Unit, Giovanni XXIII Children’s Hospital, Bari, Italy.*

40  
41 17 <sup>9</sup> *University Federico II, Department of Translational Sciences, Naples, Italy.*

42  
43 18 <sup>10</sup> *Department of Pediatrics, Casa Sollievo della Sofferenza Research Institute, San Giovanni Rotondo (Foggia), Italy.*

44  
45 19 <sup>11</sup> *Neonatology Unit, Spirito Santo Hospital, Pescara, Italy.*

46  
47 20  
48  
49 21 \* Corresponding author: Alessandra Fiorencis, ISTUD Foundation, Strada Nazionale del Sempione  
50  
51 22 Oltrefiume 25, 28831 Baveno (VB), Italy, Tel. +39 0323 933 801, Mobile +39 3420499824, Fax 0323  
52  
53 23 933805, e-mail: [afiorencis@istud.it](mailto:afiorencis@istud.it).

54  
55  
56  
57 24  
58  
59 25 **Word count: 3470**

1  
2  
3 26 **Keywords:** qualitative research, paediatric endocrinology, paediatric genetics and dysmorphology,  
4  
5  
6 27 eating disorders

7  
8 28 **ABSTRACT**

9  
10  
11 29 **Objectives.** Prader–Willi syndrome (PWS) significantly impacts health-related quality of life  
12  
13 30 (HRQoL); however, its relational and existential aspects remain unknown in Italian clinical and  
14  
15  
16 31 social debate. The project aimed to investigate the impact of PWS on illness experience through  
17  
18 32 narrative medicine (NM) to understand daily life, needs and resources of patients with PWS and  
19  
20  
21 33 their caregivers, and to furnish insights for clinical practice.

22  
23 34 **Design and setting.** The project involved 10 medical centres of the Italian Network for Rare  
24  
25  
26 35 Diseases and PWS family associations and targeted underaged and adult patients with PWS and  
27  
28 36 their caregivers. Written interviews, composed by a sociodemographic survey and a narrative,  
29  
30  
31 37 were collected through the project's website. Three dedicated illness plots employed evocative  
32  
33 38 and open words to facilitate individual expression and to encourage reflection. Narratives were  
34  
35  
36 39 analysed through NVivo software. Researchers discussed the results with the project's steering  
37  
38 40 committee.

39  
40 41 **Participants.** Twenty-one children and adolescents and 34 adults with PWS joined the project, as  
41  
42  
43 42 well as 138 caregivers. A PWS diagnosis or the caregiving of a patient with PWS older than 5 years  
44  
45  
46 43 represented the eligibility criteria, as well as the willingness to share their illness experience by  
47  
48 44 writing and the ability to communicate in Italian.

49  
50 45 **Results.** The analysis of narratives led to understanding the PWS social and relational issues  
51  
52  
53 46 concerning diagnosis and current management, PWS daily experiences and social contexts, PWS  
54  
55  
56 47 implications in the working sphere, and participants' future perspectives. Narratives demonstrated  
57  
58  
59 48 that PWS management affects relationships and work-life balance and that social stigma remains  
60 49 present.

1  
2  
3 50 **Conclusion.** The project represented the first effort to investigate the impact of PWS on illness  
4  
5  
6 51 experience in Italy through NM while considering the perspectives of patients with PWS and their  
7  
8 52 caregivers. The findings indicated that a multiprofessional approach is fundamental to ensure  
9  
10 53 adequate treatment and provided elements for its improvement.

## 13 54 **ARTICLE SUMMARY**

### 16 55 **Strengths and limitations of this study**

- 18 56 • Inclusion of patients with PWS' perspective in the project
- 20 57 • Narrative medicine approach
- 22 58 • Participants did not equally represent the geographical areas of Italy
- 24 59 • Among patients with PWS, researchers included only those able to write

## 31 61 **INTRODUCTION**

33 62 Prader–Willi syndrome (PWS) is a rare genetic condition caused by an absence of functioning  
34  
35 63 paternal genes on chromosome 15 in the 15q11-q13 region:[1] approximately 65%–70% of the  
36  
37  
38 64 cases are due to the deletion of this region, 20%–30% are caused by a maternal uniparental  
39  
40 65 disomy (UPD) of chromosome 15, and most of the remaining 2%–5% have an imprinting centre  
41  
42  
43 66 defect or unbalanced translocations (~1%).[2] PWS occurs in approximately 1 in 10,000 to 30,000  
44  
45 67 births,[3] affecting both sexes and all geographic areas.[4]

47  
48 68 Neonatal hypotonia, poor sucking and feeding difficulties characterise PWS in early infancy;  
49  
50 69 dysmorphic signs (mild craniofacial abnormalities, small hands and feet, kyphoscoliosis), multiple  
51  
52 70 endocrine abnormalities (growth hormone (GH)/IGF-I axis dysfunction, hypogonadism, central  
53  
54  
55 71 hypothyroidism, and central adrenal insufficiency) and developmental delay constitute other  
56  
57 72 cardinal features of the syndrome.[5-7] Learning disabilities, maladaptive behaviours and  
58  
59  
60 73 hyperphagia—leading to life-threatening obesity if uncontrolled—follow in childhood and

1  
2  
3 74 adulthood.[3, 8] The mortality rate of patients with PWS is higher than in the general  
4  
5  
6 75 population,[9] with a 3% annual death rate across all ages.

7  
8 76 Behavioural issues are noticeable in PWS, including aggressive and obsessive-compulsive  
9  
10  
11 77 behaviours and skin picking,[10, 11] and patients present a higher risk of developing psychiatric  
12  
13 78 illness in adulthood;[12] food-seeking behaviours are particularly complex and [13] significantly  
14  
15 79 affect patients' and caregivers' health-related quality of life (HRQoL). In particular, PWS  
16  
17  
18 80 caregivers—compared with other families managing children's disability or complex condition—  
19  
20 81 report a higher level of stress, more difficulties in coping with symptoms,[14] a higher caregiving  
21  
22  
23 82 burden,[15] and a lower HRQoL.[16]

24  
25 83 The clinical picture of patients with PWS substantially differs during the life span,[3, 6] and the  
26  
27  
28 84 prognosis is significantly conditioned by proactive interventions to prevent morbid weight  
29  
30 85 excess.[9] Currently, no treatment is available for PWS. However, early diagnosis combined with  
31  
32  
33 86 multidisciplinary care favourably influences the course of PWS;[17] therefore, the diagnosis should  
34  
35 87 be confirmed early during the neonatal period,[18] with the support of genetic testing  
36  
37  
38 88 development.[19] In this context, early GH treatment has beneficial outcomes on, for example,  
39  
40 89 height, body composition, endurance, and sense of well-being;[20-22] furthermore, early  
41  
42 90 treatment with recombinant GH positively affects PWS[23] patients' and caregivers' HRQoL.[24,  
43  
44  
45 91 25]

46  
47 92 The social, relational, emotional, and existential aspects of PWS remain profoundly unknown, and  
48  
49  
50 93 the debate within Italian clinical and social communities has been poor: The World Health  
51  
52 94 Organisation has stressed the importance of researching the measurable dimensions of HRQoL  
53  
54 95 and—more broadly—illness experiences in leading clinical and social practice and recommends  
55  
56  
57 96 using narrative research.[26]

1  
2  
3 97 The discipline of narrative medicine (NM), based on illness narratives,[27] pursues the integration  
4  
5  
6 98 of the disease-centred approach and is concerned with clinical aspects and the illness-centred and  
7  
8 99 sickness-centred approaches, which respectively focus on individual experience and the social  
9  
10  
11 100 understanding of a specific condition,[28] and both have often been neglected by the scientific  
12  
13 101 community. The range of applications for NM is from clinical practice to therapeutic path design,  
14  
15 102 education and research.[29] In research, narratives have demonstrated possible interventions on a  
16  
17  
18 103 specific condition through the integration of all perspectives involved in the pathway of care.[30,  
19  
20 104 31] Combining evidence-based medicine and NM provides clinicians methods to strengthen  
21  
22  
23 105 clinical practices with narrative competences.[29] NM research addresses the individual's  
24  
25 106 experience when coping with distress caused by clinical conditions: It allows for the understanding  
26  
27  
28 107 of the profound experiences, needs and values of all actors involved in the care pathway.[27, 32]  
29  
30 108 Scientific societies, healthcare facilities, and patient associations have increasingly employed NM  
31  
32  
33 109 research findings to improve the organisation and efficacy of healthcare services, generating  
34  
35 110 sustainability[26] and fostering quality of care for patients and their social and relational  
36  
37 111 contexts.[27]  
38  
39  
40 112 The NM project "PRAXIS: Prader-Willi Excellence in Care with Story Taking" aimed to investigate  
41  
42 113 the PWS illness experience by employing the analysis of narratives (a) to understand daily life, real  
43  
44  
45 114 needs and personal resources of people with PWS and their caregivers from diagnosis to current  
46  
47 115 management, and by doing so, (b) furnish insights to support a multidisciplinary and a  
48  
49  
50 116 multiprofessional perspective in PWS clinical practice.[17] According to our review of the  
51  
52 117 literature, no other project has addressed these issues simultaneously by considering the  
53  
54  
55 118 perspectives of underaged and adult patients with PWS and their caregivers.

## 57 119 **METHODS**

### 59 120 **Research design and setting**

1  
2  
3  
4  
5  
6  
7  
8  
9  
10  
11  
12  
13  
14  
15  
16  
17  
18  
19  
20  
21  
22  
23  
24  
25  
26  
27  
28  
29  
30  
31  
32  
33  
34  
35  
36  
37  
38  
39  
40  
41  
42  
43  
44  
45  
46  
47  
48  
49  
50  
51  
52  
53  
54  
55  
56  
57  
58  
59  
60

121 The project was conducted in Italy between October 2018 and July 2019, as a part of a broader  
122 research project, and targeted people with PWS and their caregivers, as well as professionals  
123 working with PWS. The professionals underwent a webinar conducted by researchers from the  
124 “Istituto Studi Direzionali” (Institute of Management Studies, ISTUD) Foundation to be trained in  
125 NM and on the project’s aims and methods; moreover, a parallel chart[27, 33] was identified as  
126 the most suitable NM tool to collect their narratives because it constitutes a personal notebook,  
127 parallel to the clinical record, in which professionals can write their impressions and feelings in  
128 plain language as a supplement to technical and quantitative reports.[27, 30, 33] Participants with  
129 PWS were given the possibility to express by drawing if under 5 years old or if unable to write;  
130 however, some participants over the threshold of 5 years old decided to maintain both the  
131 opportunities of expression.

132 The target group was people with PWS aged older than 5 years and their caregivers. Participants  
133 were recruited from 10 medical centres for paediatric and adult patients in the Italian Network for  
134 Rare Diseases (Supplement 1), namely six general hospitals and four scientific institutes of  
135 research, hospitalisation and healthcare: All the medical centres were macroregional, hospital-  
136 based centres that specialised in PWS treatment, and they were distributed among geographical  
137 areas (North, Central and South Italy). The Italian Prader–Willi Federation, and the Prader–Willi  
138 Association of the Lazio Region were also involved in disseminating the project; in particular, they  
139 organised three seminars—one each in the Lombardy, Lazio and Sicily regions—to provide the  
140 caregivers of those regions the opportunity to be further informed on NM and the project’s aims  
141 and methods.

142 A PWS diagnosis, determined at the reference medical centre, or a caregiver for a person older  
143 than 5 years with PWS represented the eligibility criteria, as well as the willingness to share their  
144 illness experience by writing; thus, the ability to communicate in Italian was indispensable for the

1  
2  
3 145 inclusion in the project. Participants were informed of the possibility to view the projects (in  
4  
5  
6 146 Italian) on the project's webpage: [www.medicinanarrativa.eu/praxis](http://www.medicinanarrativa.eu/praxis).

### 8 147 **Data collection**

9  
10 148 Written stories of experiences were collected anonymously through the project's webpage; next,  
11  
12  
13 149 raw and anonymous narratives were downloaded as a Microsoft Excel spreadsheet. A  
14  
15 150 sociodemographic survey constituted the written narrative, together with an illness plot[34, 35],  
16  
17  
18 151 namely, a plot related to the illness experience: It serves to guide narratives in a chronological  
19  
20 152 order to identify evolutions over time and is characterised by evocative and open words that  
21  
22  
23 153 facilitate individual expression.[36]

24  
25 154 Three illness plots were designed for three different groups—underage and adult patients with  
26  
27  
28 155 PWS, and caregivers (Supplement 2)—while addressing common aspects: (a) diagnosis and current  
29  
30 156 management of the condition, namely the strategies related to food behaviours; (b) daily living  
31  
32  
33 157 with PWS, namely, the relational sphere and social context; and (c) the work experience and  
34  
35 158 future perspectives.

36  
37 159 The project design and the research tools were created by the project's steering committee, which  
38  
39  
40 160 comprised three endocrinologist experts in PWS, namely, one each from the Oasi Maria SS.  
41  
42 161 Research Institute (Troina, Italy), the Bambino Gesù Paediatric Hospital of Palidoro (Rome, Italy),  
43  
44  
45 162 and the Istituto Auxologico Italiano of Piancavallo (Oggebbio, Italy), and three researchers from  
46  
47 163 the ISTUD Foundation different for academic backgrounds, to reduce the personal influence on  
48  
49  
50 164 the research.

### 52 165 **Patient and public involvement**

53  
54 166 The research was conducted without patient involvement. Patients did not participate in  
55  
56  
57 167 developing the research design and tools and were not engaged in the interpretation and  
58  
59  
60



1  
2  
3  
4  
5  
6  
7  
8  
9  
10  
11  
12  
13  
14  
15  
16  
17  
18  
19  
20  
21  
22  
23  
24  
25  
26  
27  
28  
29  
30  
31  
32  
33  
34  
35  
36  
37  
38  
39  
40  
41  
42  
43  
44  
45  
46  
47  
48  
49  
50  
51  
52  
53  
54  
55  
56  
57  
58  
59  
60

168 discussion of the results. Patients were not invited to contribute to the writing or editing of this  
169 document.

### 170 **Ethical considerations**

171 The project was performed according to the principles of the Declaration of Helsinki. Before the  
172 participants' involvement, they provided written informed consent after being briefed on the  
173 project's purpose and confidential data handling procedures, according to the Italian Law  
174 196/2003 on Privacy and the Safeguarding of Sensitive Data[37] and the General Data Protection  
175 Regulation of the European Union 2016/679.[38] Involved professionals obtained written  
176 informed consent to participate from parents and tutors for underaged participants during the  
177 first interview on the project's methods and purposes. Next, the professionals briefed the  
178 underage patients on the project and obtained their verbal consent to participate. Moreover,  
179 written informed consent to participate was obtained from adult participants and/or their tutors  
180 when appropriate. The Ethical Committee of the Oasi Maria SS. Research Institute (Troina, Italy)  
181 approved the project in January 2019 with the ethics approval number 2019/01/09/CE-IRCCS-  
182 OASI/19.

### 183 **Analysis**

184 We analysed the sociodemographic survey through descriptive statistics; no question was  
185 mandatory.

186 We separately examined caregivers' and patients' perspectives. Anonymous narratives were  
187 entered into NVivo software[39] for coding and analysis. ISTUD researchers collectively coded 10  
188 narratives in NVivo to assess consistency across team members. Afterwards, each narrative was  
189 coded separately by at least two researchers and then reviewed during weekly meetings and peer-  
190 debriefings to reduce bias in the interpretation of texts. Open interpretive coding was employed  
191 to identify and analyse emerging topics; Kleinman's[28] classification was retrospectively applied

1  
2  
3 192 to the analysis of narratives because the researchers considered it the most suitable to further  
4  
5  
6 193 reveal illness-related and sickness-related aspects in narratives, respectively concerning the  
7  
8 194 personal and emotional experience of a condition and how is it perceived within society.  
9  
10  
11 195 The analysis process and results were shared within the project's steering committee to  
12  
13 196 collectively address emerged topics and interpretation of data. Researchers followed the  
14  
15 197 Standards for Reporting Qualitative Research Reporting Guidelines.[40]

## 18 198 RESULTS

### 20 199 Sociodemographic aspects

22  
23 200 Twenty-one children and adolescents and 34 adults with PWS participated in the project, as well  
24  
25 201 as 138 caregivers. Table 1 summarises the sociodemographic data of these three groups; the  
26  
27  
28 202 representation includes nonresponses as a separate category.

30 **Table 1 – Sociodemographic data of participants**

|                             | Minors with PWS<br>(N = 21) | Adults with PWS<br>(N = 34) | PWS caregivers<br>(N = 138) |
|-----------------------------|-----------------------------|-----------------------------|-----------------------------|
| <b>Gender</b>               |                             |                             |                             |
| Females                     | 6 (29%)                     | 19 (56%)                    | 99 (72%)                    |
| Males                       | 15 (71%)                    | 15 (44%)                    | 37 (27%)                    |
| Nonresponses                | 0                           | 0                           | 2 (1%)                      |
| <b>Age (yrs.)</b>           |                             |                             |                             |
| Mean (SD)                   | 14 (3,09)                   | 29(9,72)                    | 48(9,04)                    |
| Minimum                     | 7                           | 19                          | 20                          |
| Maximum                     | 18                          | 48                          | 61                          |
| <b>Geographic residence</b> |                             |                             |                             |
| Northern Italy              | 3 (13%)                     | 19 (58%)                    | 29 (21%)                    |
| Central Italy               | 4 (19%)                     | 6 (18%)                     | 40 (29%)                    |
| Southern Italy              | 14 (69%)                    | 9 (24%)                     | 69 (50%)                    |
| Nonresponses                | 0                           | 0                           | 0                           |
| <b>Education</b>            |                             |                             |                             |
| Elementary school           | 10 (48%)                    | 2 (6%)                      | 5 (4%)                      |
| Middle school               | 5 (24%)                     | 10 (30%)                    | 19 (14%)                    |
| High school                 | 2 (10%)                     | 21 (64%)                    | 76 (55%)                    |
| University degree           | 0                           | 1 (1%)                      | 19 (14%)                    |
| Nonresponses                | 4 (19%)                     | 0                           | 19 (13%)                    |
| <b>Marital status</b>       |                             |                             |                             |
| Single                      | 21 (100%)                   | 33 (97%)                    | 3 (2%)                      |
| Married/ cohabitate         | 0                           | 1 (3%)                      | 118 (86%)                   |
| Divorced/separated          | 0                           | 0                           | 14 (10%)                    |
| Widowed                     | 0                           | 0                           | 3 (2%)                      |
| Nonresponses                | 0                           | 0                           | 0                           |
| <b>Employment status</b>    |                             |                             |                             |
| Student                     | 21 (100%)                   | 4 (11%)                     | 3 (2%)                      |

|              |   |          |          |
|--------------|---|----------|----------|
| Working      | 0 | 19 (56%) | 94 (68%) |
| Not working  | 0 | 11 (33%) | 38 (28%) |
| Retired      | 0 | 0        | 3 (2%)   |
| Nonresponses | 0 | 0        | 0        |

*Data presented as N (%) or mean (standard deviation) and minimum/maximum.*

Results from the analysis are presented by following the dedicated illness plots' structure: (a) the first section concerns PWS diagnosis and current management, in which narratives' illness-related and sickness-related aspects, caregivers' perspectives on therapeutic path, and strategies to manage food-seeking behaviours are addressed; (b) the second section focuses on living with PWS in relational and social contexts and addresses participants' indoor and outdoor daily activities; (c) the third section concerns caregivers' and PWS adult patients' narratives on the working sphere and participants' future perspectives and desires.

#### **From diagnosis to the current management of PWS**

Thirty-six percent of caregivers reported that their children were diagnosed with PWS within the first month of life (Figure 1); however, 10% affirmed that the diagnosis occurred after the child's third year of life.

In narratives, 95% of caregivers focused on PWS illness- and sickness-related aspects (Table 2); the remaining 5% adopted technical and clinical language[28] to discuss the condition, as exemplified in the following two quotes from narratives. (a) *She was hospitalised at the Neurology department for a muscle biopsy; diagnosed with congenital myopathy and 2 years later, underwent the DNA test. She was sent to a hospital in Northern Italy, and from there, we got the Prader–Willi diagnosis* (caregiver 015). (b) *He underwent nine surgeries: adenoids, laryngotomy, broken arm fracture, desmoid, flat foot, strabismus. He has been taking GH since he was a child* (caregiver 063).

Disbelief, displacement, anger, and pain represented the most recurrent emotions expressed by caregivers when attempting to adapt to the situation and its criticalities. Patients with PWS—

224 underaged and adult—described the condition only through its illness-related and sickness-related  
 225 facets.

**Table 2 – Illness- and sickness-related aspects: quotes from narratives**

|                 | Caregivers                                                                                                                                                                                                                                                                                                                                                                                                                                                                                                                                                                                                                                                                                                                                                                                                                                                                                                                                                   | Minors and adults with Prader–Willi syndrome                                                                                                                                                                                                                                                                                                                                                                                                                                                                                                                                                                                                                                                                             |
|-----------------|--------------------------------------------------------------------------------------------------------------------------------------------------------------------------------------------------------------------------------------------------------------------------------------------------------------------------------------------------------------------------------------------------------------------------------------------------------------------------------------------------------------------------------------------------------------------------------------------------------------------------------------------------------------------------------------------------------------------------------------------------------------------------------------------------------------------------------------------------------------------------------------------------------------------------------------------------------------|--------------------------------------------------------------------------------------------------------------------------------------------------------------------------------------------------------------------------------------------------------------------------------------------------------------------------------------------------------------------------------------------------------------------------------------------------------------------------------------------------------------------------------------------------------------------------------------------------------------------------------------------------------------------------------------------------------------------------|
| <b>Illness</b>  | <p>– <i>It is not easy to live with a child who has this syndrome, especially when she asks for food. I tell her “No,” and she starts to cry and get upset, screaming and saying things to me that I do not understand, but I do not give up.</i> (Caregiver 051)</p> <p>– <i>I was nervous. I didn't know what was happening. Yet in the delivery room, when I saw my baby, she was beautiful! What was the problem? When I talked to a geneticist the next day, I started crying.</i> (Caregiver 074)</p> <p>– <i>Broken dreams, the feeling that something has changed forever—that my life has changed. I used to be so self-confident, so independent, and suddenly, I felt fragile, scared, and alone—dreadfully alone, unable to react.</i> (Caregiver 031)</p> <p>– <i>When my son was born, the doctors immediately told me that something was wrong. It was terrible. I was young, and he was my long-awaited first child.</i> (Caregiver 019)</p> | <p>– <i>I feel proud. My disability does not scare me.</i> (Adult with PWS 030)</p> <p>– <i>Sometimes I feel happy, and sometimes I am sad because of my disease.</i> (Adult with PWS 005)</p> <p>– <i>I want to be with the other non-disabled kids—my only problem is eating.</i> (Minor with PWS 007)</p> <p>– <i>I mostly feel happy, but sometimes I am a bit sad about my illness. I am happy because the Lord created me, and I like myself as I am when I came into existence.</i> (Adult with PWS 009)</p>                                                                                                                                                                                                      |
| <b>Sickness</b> | <p>– <i>Food is not the only danger: anything can happen to my son, he can be tricked or manipulated.</i> (Caregiver 062)</p> <p>– <i>When my daughter was diagnosed with Prader–Willi syndrome, I felt terrible, because I couldn't accept the syndrome and because I saw the other mothers with their children, happy and carefree, and I knew it wouldn't be like that for us. Over time, I learned to accept the situation. My daughter's disability does not mean not living—it means living differently.</i> (Caregiver 049)</p> <p>– <i>I was upset. It was hard to believe that my daughter could not have a future like all the other children.</i> (Caregiver 052)</p> <p>– <i>Often, we felt desperate, especially as we thought about our son's future, but then, we learned to deal with problems as they arose.</i> (Caregiver 027)</p>                                                                                                        | <p>– <i>I do not feel equal to the kids of my generation. I hate myself. I want to die. Sometimes I would like to be a boy like the others and to always be happy.</i> (Adult with PWS 014)</p> <p>– <i>The effects of Prader–Willi syndrome last throughout one's lifetime. It is difficult to communicate with others, even with my own parents.</i> (Adult with PWS 016)</p> <p>– <i>Other people are bad. They do not care about me because I have this syndrome.</i> (Minor with PWS 007)</p> <p>– <i>On the one hand, I feel different from others because I am disabled and hypotonic. On the other hand, I do feel like them because I am lucky enough to walk, to see and to hear.</i> (Adult with PWS 032)</p> |

226  
 227 In Table 3, a focus on therapeutic paths from the caregivers' perspective meant addressing (a)  
 228 relationships with different professionals and (b) healthcare structures, and the (c) necessary or  
 229 employed treatments, beyond diet.

**Table 3 –Perspectives from PWS caregivers on the therapeutic path: quotes from narratives**

|                              |                                                                                                                                                                                                                                                                                                                                                                                                                                                                                                                                                                                                                                                                                                                                                                                                                                                                                                                  |
|------------------------------|------------------------------------------------------------------------------------------------------------------------------------------------------------------------------------------------------------------------------------------------------------------------------------------------------------------------------------------------------------------------------------------------------------------------------------------------------------------------------------------------------------------------------------------------------------------------------------------------------------------------------------------------------------------------------------------------------------------------------------------------------------------------------------------------------------------------------------------------------------------------------------------------------------------|
| <b>Professionals</b>         | <p>– Thanks to our specialist, we got an appointment at the hospital, where we currently get care. They deal with many cases, and for us, this is a guarantee. On a human level, they are unparalleled, available, smiling; this lets us be more at peace, without feeling our burden. (Caregiver 038)</p> <p>– I started meeting health workers, support teachers and incapable teachers, unprepared paediatricians, arrogant doctors, medical commissions, and courts. I clashed with bureaucracy, absurd health protocols and illogical rules to get what my daughter was entitled to and to support her psycho-physical well-being. (Caregiver 031)</p> <p>– I was disappointed by the professionals. They talked about my son and my life as something that could not be changed, fatal, hopeless. I decided to get as far away as possible. My son was not a syndrome, he was a child. (Caregiver 011)</p> |
| <b>Healthcare structures</b> | <p>– We do not live in a big city, so we had great difficulty getting our daughter adequately seen to. (Caregiver 018)</p> <p>– At the hospital, they presented us with the path we should have taken... on a medical level! For a therapeutic level, I had to resort to private professionals and centres. (Caregiver 024)</p> <p>– Miles of roads and hotel rooms characterise the therapeutic path that families must pass, both in economic terms and in terms of stress. (Caregiver 066)</p>                                                                                                                                                                                                                                                                                                                                                                                                                |
| <b>Treatments</b>            | <p>– This part was better than expected. The only medicine we use is GH, which is simple and painless. (Caregiver 008)</p> <p>– Psychomotricity, GH, speech and music therapy, psychological support and sports. (Caregiver 010)</p> <p>– During his adolescence, we had to resort to psychiatric drugs: this felt like a defeat, but it was necessary. Our son had become unmanageable. Psychiatrists have little knowledge of the syndrome. (Caregiver 027)</p>                                                                                                                                                                                                                                                                                                                                                                                                                                                |

From caregivers’ narratives, food-seeking behaviours[13] emerged as the most challenging event within the domestic context. Caregivers were aware that feeding is the first treatment for people with PWS and sought strategies to feed them. Fifty percent declared that they had achieved a balance, and the other 50% reported a problematic relationship with food. Both underaged and adult participants with PWS were aware of the importance of following a diet: positive or negative relationships with food emerged from narratives, where (a) the positive relationships also represented the result of commitment and several strategies to manage food-seeking behaviours, and (b) food-seeking was related to emotions (e.g. anger). Table 4 shows the main elements that emerged from the caregivers’ and PWS participants’ narratives.

**Table 4 – Attitudes towards food-seeking behaviours: quotes from narratives**

|                   | Caregivers                                                                                                                                                                                                                                                     | Minors and adults with Prader–Willi syndrome                                                                                                                                                                                                                                                   |
|-------------------|----------------------------------------------------------------------------------------------------------------------------------------------------------------------------------------------------------------------------------------------------------------|------------------------------------------------------------------------------------------------------------------------------------------------------------------------------------------------------------------------------------------------------------------------------------------------|
| <b>Commitment</b> | <p>– The first thing that I did was to visit a professor in Switzerland to get a diet as pure as possible that could give strength and good energy to my child. I decided to follow it. (Caregiver 011)</p> <p>– We began to have a different relationship</p> | <p>– I know eating a lot is bad for me. I follow my diet, so I don't get fat. (Minor with PWS 005)</p> <p>– I stay on my diet, and I never steal food. Even if someone offers me something, I do not accept it. (Adult with PWS 032)</p> <p>– I am following a diet that was prepared by a</p> |

1  
2  
3  
4  
5  
6  
7  
8  
9  
10  
11  
12  
13  
14  
15  
16  
17  
18  
19  
20  
21  
22  
23  
24  
25  
26  
27  
28  
29  
30  
31  
32  
33  
34  
35  
36  
37  
38  
39  
40  
41  
42  
43  
44  
45  
46  
47  
48  
49  
50  
51  
52  
53  
54  
55  
56  
57  
58  
59  
60

---

*with food and to be more aware of what we could and could not eat. (Caregiver 034)*

*– We tried to accustom the whole family to healthy eating as much as possible. I taught my son to read nutrition labels so that later he would be able to choose what is best. He already knows that he must not eat too much sugar and fat. We eat at fixed times, but it is not easy to manage his hunger. (Caregiver 040)*

---

|                      |                                                                                                                                                                                                                                                                                                                                                                                                                                                                                                                                                                                                                                                                                                                                                             |                                                                                                                                                                                                                                                                                                                                                                                                                                                                                                                                                                                                                                            |
|----------------------|-------------------------------------------------------------------------------------------------------------------------------------------------------------------------------------------------------------------------------------------------------------------------------------------------------------------------------------------------------------------------------------------------------------------------------------------------------------------------------------------------------------------------------------------------------------------------------------------------------------------------------------------------------------------------------------------------------------------------------------------------------------|--------------------------------------------------------------------------------------------------------------------------------------------------------------------------------------------------------------------------------------------------------------------------------------------------------------------------------------------------------------------------------------------------------------------------------------------------------------------------------------------------------------------------------------------------------------------------------------------------------------------------------------------|
| <b>Strategies</b>    | <p><i>– We are almost always able to keep it under control; we focus a lot on food education (i.e. salads, vegetables, and no snacks). We let her choose among certain foods. This helped satisfy her, allowing us to eat differently. (Caregiver 032)</i></p> <p><i>– Food is the main problem for my child; there are both positive and negative moments. So, we are tough if we need to be, but sometimes we make exceptions. (Caregiver 060)</i></p> <p><i>– Food is always on our minds, but we try to manage everything in the best way we can. We try to live as normal a life as possible, and we try not to upset his habits. We give him some treats (he goes to parties, goes out with some friends, and can eat pizza). (Caregiver 064)</i></p> | <p><i>nutritionist. (Adult with PWS 023)</i></p> <p><i>– I like to eat everything. I try to eat lots of vegetables, even if I do not feel full, and whole wheat pasta. When I am playing or doing a puzzle, I do not think about hunger. Mom tells me that if I want to eat more, I have to move around more. (Adult with PWS 003)</i></p> <p><i>– I try to organise my day in fixed patterns, and I know I can eat at certain times. (Minor with PWS 003)</i></p> <p><i>– So, I do not think about food, I go for long walks, I do crossword puzzles and other puzzles and I play on my tablet and computer. (Minor with PWS 006)</i></p> |
| <b>Criticalities</b> | <p><i>– Unfortunately, food is an obsession and is challenging to manage. I have found my little child hiding food many times. (Caregiver 052)</i></p> <p><i>– The food issue is a daily challenge. Lunches and dinners are no longer quiet, and we live with anxiety. The kitchen is no longer a meeting place. (Caregiver 066)</i></p> <p><i>– This is our conviction, a continuous struggle, day and night—the monster we have to defeat. (Caregiver 067)</i></p>                                                                                                                                                                                                                                                                                        | <p><i>– I eat outside of meals because I hate myself... I am hungry because my parents do not give me the right portions, and then I get fat and go to the hospital, I steal food... because I am hungry. I do not follow my diet. (Adult with PWS 014)</i></p> <p><i>– Seeing other people eating is painful. (Adult with PWS 022)</i></p> <p><i>– When I think of food, my eyes shine, and when I see food, I want it at all costs, and I cannot stop myself. I am always hungry, and I never get enough; when I overeat, I feel sick. When they tell me that I should not eat so much, I get angry and anxious. (Adult 031)</i></p>     |

---

## Living with PWS in relationships and in social contexts

Thirty-six percent of PWS caregivers described daily life at home as quiet; however, most (64%) reported: fatigue (21%), chaos (6%), all-encompassing assistance (20%), and using tested routines to better manage food-seeking behaviours (17%). They have attempted to maintain their hobbies, interests and outside activities, even though their sons and daughters have PWS (Table 5). Relationships external to the family are difficult to preserve, imposing a radical change in social life. Indoor and outdoor activities represented an essential tool for caregivers in managing

1  
2  
3 248 emotion patterns and food-seeking behaviours: narratives demonstrated that underaged and  
4  
5  
6 249 adult participants with PWS were aware of that. Sport, mind activity games, gardening and pet  
7  
8 250 therapy were some of the most helpful activities reported; furthermore, patients with PWS  
9  
10  
11 251 appeared dedicated to cleanliness and routine activities. Both relational and activity spheres  
12  
13 252 revealed the influence of behavioural and emotional changes in daily life and in familiar and social  
14  
15 253 contexts; moreover, narratives addressed the strong presence of caregivers, as well as situations  
16  
17  
18 254 of social inclusion or exclusion.

**Table 5 – Living with Prader–Willi syndrome (PWS) in activities and relationships: quotes from narratives**

|                           | Caregivers                                                                                                                                                                                                                                                                                                                                                                                                                                                                                                                                                                               | Minors and adults with PWS                                                                                                                                                                                                                                                                                                                                                                                                                                                                                                                                                                                                                                                                                  |
|---------------------------|------------------------------------------------------------------------------------------------------------------------------------------------------------------------------------------------------------------------------------------------------------------------------------------------------------------------------------------------------------------------------------------------------------------------------------------------------------------------------------------------------------------------------------------------------------------------------------------|-------------------------------------------------------------------------------------------------------------------------------------------------------------------------------------------------------------------------------------------------------------------------------------------------------------------------------------------------------------------------------------------------------------------------------------------------------------------------------------------------------------------------------------------------------------------------------------------------------------------------------------------------------------------------------------------------------------|
| <b>Indoor activities</b>  | <p>– I like talking to my daughter, finding out what she wants to do and meeting her needs. I like to see her play with her friends and laugh because she is lovely and charismatic. (Caregiver 037)</p> <p>– I love being with my family; I'm a full-time mom. I would like to go to the gym and to be a woman like others, but I do not have time. (Caregiver 043)</p> <p>– In my spare time I am a musician. (Caregiver 041)</p>                                                                                                                                                      | <p>– I have two kittens at home. I take care of them. At home, I help my mother cleaning and ironing clothes and shirts. Every day I take care of my hygiene and make my bed. (Minor with PWS 002)</p> <p>– Mom does not want me to go to the kitchen. I do puzzles or embroidery. I watch Disney cartoons. I read the newspapers. When I am sad or angry, I try to eat. I often quarrel with my mom. My dad says nothing because he makes me more upset. (Adult with PWS 003)</p> <p>– I watch television, I listen to music and I pray every day. Every morning I make the beds, and I set the table while my parents are cooking. (Adult with PWS 012)</p>                                               |
| <b>Outdoor activities</b> | <p>– I refresh myself by being alone. I do yoga, I study Japanese, I sing in a choir. I have not given up my passions. (Caregiver 074)</p> <p>– As the years went by, I dedicated more and more time to my son. So, I gave up my passions to devote myself to him. I still cultivate a passion for sport, which I rarely practice. I love reading at night. (Caregiver 019)</p> <p>– I would like to swim, to go for walks by the sea and around the lake. I would like to have no responsibilities, schedules or limitations; I would like to be a little carefree. (Caregiver 012)</p> | <p>– I do athletics, especially playing football and swimming. I go for walks with others, alone or with my dog. I like going to see my favourite football team play at the stadium. I play videogames and watch movies. I like going to see my favourite animal, the dolphin, at the dolphinarium. (Adult with PWS 011)</p> <p>– I try to help people in trouble. I do a lot of activities such as swimming pool, occupational therapy and kinesiotherapy because I have had back surgery twice for severe scoliosis. (Minor with PWS 006)</p> <p>– I like going out, shopping, swimming, listening to music, drawing, cutting and pasting, making figurines and making collages. (Adult with PWS 027)</p> |
| <b>Relationships</b>      | <p>– Some people have tried to understand the condition, but others have disappeared. The syndrome helped me to choose from among the people around me. (Caregiver 075)</p> <p>– My father and my mother were as sorry and as much in disbelief as I was, and they were unable to get over it. My sister and friends supported me. My husband shut himself off,</p>                                                                                                                                                                                                                      | <p>– My parents are the closest and most valuable people. They are strict but affectionate and loving. I am always looking for contact with them, even if I have made them angry. My brothers are also close to me. One of them is playful, and the other one is protective, a little severe. With them, I am calm and feel protected. (Adult with PWS 038)</p>                                                                                                                                                                                                                                                                                                                                             |

and he is present and absent at the same time, except for practical things. (Caregiver 004)  
 – The grandparents have been fantastic, available and always ready to help us. Our friends did not understand our situation, and our roads soon split: your social life changes radically. (Caregiver 066)

– At school, I have tried to get closer to others, but they do not like to be with me and do not want me. My professors love me; however, with some of them, I feel that I am different and not good. As for my parents, my biological mother did not love me, and my father hated me; my new parents love me so much. (Adult with PWS 014)  
 – I love my family. They do everything they can to make me happy. (Minor with PWS 008)

## Work and future perspectives

Sixty-two percent of family caregivers had to change their job after the birth of their child with PWS (Table 6): more than one third left their current work, 8% changed jobs to assist the child, 8% requested a part-time job, and 3% abandoned the perspective of a career. From a gender perspective, 63% of female (mothers) and 33% of male caregivers had to change their current job to adapt to the child's condition. Forty-six percent did not discuss PWS in the workplace or discussed PWS with only their closest colleagues; 36% reported comprehensive behaviours, and 18% declared a lower understanding of PWS management necessities than for other diseases, such as cancer. Based on the narratives, work was a positive personal resource. Fifty-six percent of adults with PWS declared that they were working in jobs mainly characterised by low complexity and repetitive operations and conducted in social cooperatives or centres, small companies with high corporate social responsibility, and family companies. Work is a source of pride and well-being and a distraction from food, but episodes of irritability and aggressive behaviours have been reported.

**Table 6 – Prader–Willi syndrome and the work sphere: quotes from narratives**

|                        |                                                                                                                                                                                                                                                                                                                  |
|------------------------|------------------------------------------------------------------------------------------------------------------------------------------------------------------------------------------------------------------------------------------------------------------------------------------------------------------|
| <b>Adults with PWS</b> | – My colleagues are supportive; they are good listeners and give me good advice. (Adult with PWS 008)                                                                                                                                                                                                            |
|                        | – I deal with publicity, I answer the phone, I receive the people who visit, and I do other tasks that the office managers assign me. If I am happy and motivated, I do not go looking for food. I look for food only when I am nervous. I have made so much progress, and so I do it less. (Adult with PWS 015) |
|                        | – I often have nervous attacks and respond badly. I offend with swear words those who make fun of how I am doing my job. (Adult with PWS 006)                                                                                                                                                                    |
|                        | – I work in a nursing home 5 days a week. I wash laundry and iron and fold the guests' clothes. I work with a girl who takes care of me and teaches me many things. Every day I work with a different person, depending on the shift. With them, I feel good                                                     |



---

|                       |                                                                                                                                                                                                                                                                                                                                                                                                                                                                                                                                                                                                                                                                                                                                                                                                                                           |
|-----------------------|-------------------------------------------------------------------------------------------------------------------------------------------------------------------------------------------------------------------------------------------------------------------------------------------------------------------------------------------------------------------------------------------------------------------------------------------------------------------------------------------------------------------------------------------------------------------------------------------------------------------------------------------------------------------------------------------------------------------------------------------------------------------------------------------------------------------------------------------|
|                       | <i>because they treat me like a normal person, and they praise me every time I work with them. (Adult with PWS 013)</i>                                                                                                                                                                                                                                                                                                                                                                                                                                                                                                                                                                                                                                                                                                                   |
| <b>PWS caregivers</b> | <ul style="list-style-type: none"> <li>– <i>My colleagues firmly support me. They give me the ability to meet my personal needs, which allowed me not to leave my son and my wife alone. They were like a second family to me, and they all contributed as much as they could. (Caregiver 054)</i></li> <li>– <i>I had to leave work. I was working in the factory 8 hours a day, and it was not possible to ask for a part-time position. (Caregiver 053)</i></li> <li>– <i>The job was a safety valve, a place to have a normal life. (Caregiver 023)</i></li> <li>– <i>When another daughter of mine had cancer, my colleagues were very involved, helpful and supportive. Everyone understands cancer. The disability is different, particularly the Prader–Willi syndrome, which is not very obvious. (Caregiver 008)</i></li> </ul> |

---

15 270

17 271 Regarding future perspectives, PWS family caregivers hope to have long lives so that they can care  
 18  
 19 272 for their sons and daughters as long as possible, and they were particularly concerned with what  
 20  
 21  
 22 273 would happen to their children without familial support (Table 7). Caregivers also addressed social  
 23  
 24 274 inclusion, such as social changes and openness, rather than clinical solutions to PWS. Adult  
 25  
 26  
 27 275 participants with PWS demonstrated self-realisation through work (27%)—as underaged  
 28  
 29 276 participants did—and the desire to have a family (46%), recover from PWS (10%), and generally  
 30  
 31  
 32 277 live well (14%).

**Table 7 – Living with Prader–Willi syndrome and future thoughts: quotes from narratives**

---

|                        |                                                                                                                                                                                                                                                                                                                                                                                                                                                                                                                                                                                                                                                                                                                                                                                                                                                                                                                                                                                                                                                                        |
|------------------------|------------------------------------------------------------------------------------------------------------------------------------------------------------------------------------------------------------------------------------------------------------------------------------------------------------------------------------------------------------------------------------------------------------------------------------------------------------------------------------------------------------------------------------------------------------------------------------------------------------------------------------------------------------------------------------------------------------------------------------------------------------------------------------------------------------------------------------------------------------------------------------------------------------------------------------------------------------------------------------------------------------------------------------------------------------------------|
| <b>Minors with PWS</b> | <ul style="list-style-type: none"> <li>– <i>When I grow up, I want to be a professor of endocrinology to study my syndrome. (Minor with PWS 007)</i></li> <li>– <i>I want to be a vet because I love animals. (Minor with PWS 014)</i></li> <li>– <i>I want to drive an ambulance and do many different jobs. (Minor with PWS 009)</i></li> </ul>                                                                                                                                                                                                                                                                                                                                                                                                                                                                                                                                                                                                                                                                                                                      |
| <b>Adults with PWS</b> | <ul style="list-style-type: none"> <li>– <i>I want to start a family by adopting a child because I have so much love to give and to be with my boyfriend. I hope to work in the same place where I am. I do not know how to live without my parents; they help us a lot. (Adult with PWS 013)</i></li> <li>– <i>I want to go live with the person I love the most in the world and to have children. Above all, I want to become a famous singer, and personally meet all my favourite singers. I want to get married and live in a beautiful house with a pool. (Adult with PWS 009)</i></li> <li>– <i>I hope that medicine will be able to find a drug to that can increase my satiety and limit my nervous hunger, which is unfortunately increased by my syndrome. Some moments are hard to overcome. I hope to live as well as I can with the consequences of the syndrome, and I hope that doctors are able to find treatments to alleviate the challenges. I hope that other people will also be able to live better lives. (Adult with PWS 015)</i></li> </ul> |
| <b>PWS caregivers</b>  | <ul style="list-style-type: none"> <li>– <i>I am sure that his future will be full of satisfaction. We are working to ensure a positive future for him and to find him a job that makes him happy and confident in his abilities. (Caregiver 075)</i></li> <li>– <i>I believe the future will be challenging; I hope that I am wrong, but I realised that most people care most about their own business. Indeed, it is painful and challenging to care for or remain close to people with this kind of pathology. Still, perhaps if people did their part and committed themselves more to social causes, the future could be different. We should learn from an early age that we need to help other people and stand by those in need. (Caregiver 054)</i></li> </ul>                                                                                                                                                                                                                                                                                               |

---

---

– As long as we, her family, are there, I think that her future is protected. What comes after is frightening, but I know I have to do something for her ... I owe her that!  
(Caregiver 031)

---

6 278

7

8

9 279

**DISCUSSION**

10

11 280

12

13

14 281

15

16 282

17

18

19 283

20

21 284

22

23 285

24

25

26 286

27

28 287

29

30

31 288

32

33 289

34

35

36 290

37

38 291

39

40

41 292

42

43 293

44

45 294

46

47

48 295

49

50 296

51

52

53 297

54

55 298

56

57

58 299

59

60 300

The PRAXIS project represents the first effort to investigate the PWS illness experience in Italy through NM by simultaneously considering the perspectives of underaged and adult patients with PWS and their caregivers. The project first aimed to understand their daily life, real needs and personal resources. Fifty-five participants, namely, children, adolescents and adults with PWS, reported joy and pride in sharing their stories, also suggesting that using evocative and open words[36] in structuring illness plots can be crucial to helping people to express themselves. Moreover, the collection of 138 caregiving stories suggested a strong dedication to the survey and the need for caregivers to be listened to: They described writing as liberating, demonstrating its potential (a) to have a therapeutic effect[27, 33] and (b) to be a safe space from the attitude of passing,[41] namely, handling information considered discrediting or critical for the self to avoid social stigma.

Talking about PWS emerged as a ‘taboo’. In illness-centred and sickness-centred narratives [28], caregivers encountered significant difficulties in socialising the challenges PWS imposes in daily life, as well as the pain of having a child “different” from social imagery: We identify this as a social pain that also concerns caregivers when performing familiar criticalities. Furthermore, caregivers considered the project a chance to invite society to integrate people with PWS and to denounce the stigma[41] that surrounds them.

If the literature demonstrates cognitive impairment in people with PWS,[6] we would like to enrich the evidence by suggesting the consideration of the multiple intelligences[42] these people demonstrate in their everyday experience. In line with Gardner’s[42] reflection, revealing alternatives to the standard forms of intelligence (the logical-mathematical and linguistic ones),

1  
2  
3  
4  
5  
6  
7  
8  
9  
10  
11  
12  
13  
14  
15  
16  
17  
18  
19  
20  
21  
22  
23  
24  
25  
26  
27  
28  
29  
30  
31  
32  
33  
34  
35  
36  
37  
38  
39  
40  
41  
42  
43  
44  
45  
46  
47  
48  
49  
50  
51  
52  
53  
54  
55  
56  
57  
58  
59  
60

301 the narratives demonstrated the constant use of visuospatial, musical, interpersonal, existential  
302 and introspective talents, resources and capabilities. In this regard, patients with PWS have been  
303 reported to show above-average performance in several tasks implying visuospatial skills,[43]  
304 which in the general population are linked with higher math abilities.[44] In particular, the  
305 importance of multiple intelligences emerged in food- control strategies and activities,  
306 consequently suggesting that considering them may positively influence the overall illness  
307 experience.

308 Considering the second purpose of the project, specific elements emerged from the analysis of  
309 therapeutic paths. PWS diagnosis mostly occurred up to the child's second year of life, but in some  
310 cases, a significant delay remained, particularly for those people living away from specialised  
311 centres. Because timing is essential in PWS treatment,[9] training for neonatologists, geneticists  
312 and general paediatricians on PWS might improve early diagnosis. Moreover, the other  
313 professionals involved also must develop or strengthen specific PWS competencies to  
314 appropriately address this condition.

315 The narratives demonstrated some peculiar clinical PWS characteristics, such as irritability,  
316 aggressive and obsessive-compulsive behaviour [10, 11] and food-seeking[13] behaviours. The last  
317 resulted in the most challenges for the people with PWS and their caregivers: Food management  
318 strategies,[45] and indoor and outdoor activities[46] and school or work schedules,[47, 48] can  
319 help people with PWS and their caregivers improve their relationships with food and family  
320 members, enhancing overall daily life.

321 Diet management and strategies, early GH therapy, clinical and psychiatric treatments, activities in  
322 specialised or social centres, and the different professional roles involved demonstrated that a  
323 mutiprofessional approach that integrates the factors of hospital and territory is fundamental to  
324 ensure adequate treatment of PWS [17, 47, 49] and to mitigate the burden of caregiving reported

1  
2  
3 325 in the narratives and the literature.[14-16] In particular, two related topics emerged: (a) mostly  
4  
5  
6 326 women (mothers) changed or retired from work to become a caregiver; (b) family caregivers  
7  
8 327 stated their concerns regarding what will happen to their sons and daughters if no family  
9  
10  
11 328 members are available —a topic already addressed by Italian Law 112/2016, on the social  
12  
13 329 inclusion and autonomy of people with disabilities. These considerations also suggest, on the one  
14  
15 330 hand, that social centres and services are crucial but need to be implemented in areas that have  
16  
17  
18 331 insufficient support for people with PWS and their caregivers, and on the other hand, a focus on  
19  
20 332 work policies to create autonomy and social inclusion. Overcoming economic, legal, and social  
21  
22  
23 333 barriers and improving the current service provision still represent a challenge; patient  
24  
25 334 organisations and scientific societies may have a crucial role in addressing these issues.  
26  
27  
28 335 Furthermore, although a national plan for rare diseases[50] has been developed in Italy since  
29  
30 336 2013, its application in daily practice remains demanding. One possible intervention strategy to  
31  
32  
33 337 reduce medical barriers requires universities and scientific societies to develop specific  
34  
35 338 educational programmes; in particular, creating a PWS national register may help to interface with  
36  
37  
38 339 similar international tools.[51]  
39  
40 340 The acknowledgement of the importance of multiple intelligences[42] in everyday experiences  
41  
42 341 may also improve the daily and relational life of people with PWS or their caregivers, together  
43  
44  
45 342 with ameliorating the social stigma of PWS and enhancing social inclusion. Multiple intelligences  
46  
47 343 might also become a tool in clinical practice to better evaluate people with PWS; moreover, an  
48  
49  
50 344 evolving model for PWS care should include modern technologies, e.g. video visits, remote  
51  
52 345 monitoring and electronic health records.[52]  
53  
54  
55 346 The participants in the project did not equally represent the different geographical areas in Italy  
56  
57 347 because of the local distribution of expert centres in the management of care for PWS, and this  
58  
59 348 could be a selection bias. Furthermore, the results are specific because of (a) the voluntary nature  
60

1  
2  
3  
4  
5  
6  
7  
8  
9  
10  
11  
12  
13  
14  
15  
16  
17  
18  
19  
20  
21  
22  
23  
24  
25  
26  
27  
28  
29  
30  
31  
32  
33  
34  
35  
36  
37  
38  
39  
40  
41  
42  
43  
44  
45  
46  
47  
48  
49  
50  
51  
52  
53  
54  
55  
56  
57  
58  
59  
60

349 of the project and (b) the critical difference among Italian regional healthcare systems; therefore,  
350 further analysis is required. For people with PWS, the inclusion criterion of being able to write  
351 represented another bias.

352 In conclusion, this NM project provides new insights into the individual and social experiences  
353 related to PWS and provides elements for improving multidisciplinary and multiprofessional  
354 perspectives on this condition: The social, relational, and emotional aspects of PWS crucially  
355 influence the illness experience and narratives that can foster the relationship between PWS  
356 professionals, patients, families and the community.

### 357 **Acknowledgements**

358 The authors wish to thank all participants in the project, the Italian Prader–Willi Federation and  
359 the Prader–Willi Association of Lazio Region for their active contribution. Acknowledgements are  
360 extended also to the researchers of the Healthcare Area of ISTUD Foundation for their useful role  
361 throughout this project and to Enago ([www.enago.com](http://www.enago.com)) for the English language review.

### 362 **Competing interests**

363 Authors have nothing to disclose.

### 364 **Funding**

365 Sandoz S.p.A. unconditionally supported ISTUD Foundation for the realisation of the project.  
366 Authors did not receive any fee and were not influenced in the research design or conduct or in  
367 the decision to publish the results.

### 368 **Author contributions**

369 Conceptualisation: Ragusa, Crinò, Grugni, Reale, Marini. Analysis: Reale, Fiorencis. Investigation:  
370 Ragusa, Crinò, Grugni, Reale, Fiorencis, Licenziati, Faienza, Wasniewska, Delvecchio, Franzese,  
371 Rutigliano, Fusilli, Corica, Campana, Greco, Chiarito, Sacco, Toscano, Marini. Methodology: Reale,  
372 Marini. Project administration: Reale. Ragusa, Crinò, Grugni, Reale, Marini. Report visualisation:

1  
2  
3 373 Ragusa, Crinò, Grugni, Reale, Fiorencis, Licenziati, Faienza, Wasniewska, Delvecchio, Franzese,  
4  
5  
6 374 Rutigliano, Fusilli, Corica, Campana, Greco, Chiarito, Sacco, Toscano, Marini. Writing: Fiorencis,  
7  
8 375 Ragusa, Crinò, Grugni, Reale, Marini. Editing: Fiorencis.  
9

## 10 376 **Data sharing**

11  
12  
13 377 All data relevant to the project are included in the present manuscript. Original narratives are  
14  
15 378 available into Italian upon request at the email [areasanita@istud.it](mailto:areasanita@istud.it).  
16  
17

## 18 379 **References**

- 19  
20  
21 380 1. Butler MG, Hartin SN, Hossain WA, et al. Molecular genetic classification in Prader–Willi  
22  
23 381 syndrome: a multisite cohort study. *J Med Genet* 2019;56:149–53.  
24  
25 382 2. Irizarry KA, Miller M, Freemark M, et al. Prader Willi syndrome: genetics, metabolomics,  
26  
27 hormonal function, and new approaches to therapy. *Adv Pediatr* 2016;63:47–77.  
28 383  
29  
30 384 3. Cassidy SB, Schwartz S, Miller JL, et al. Prader–Willi syndrome. *Genet Med* 2012;14:10–26.  
31  
32  
33 385 4. Vogels A, Van Den Ende J, Keymolen K, et al. Minimum prevalence, birth incidence and  
34  
35 386 cause of death for Prader–Willi syndrome in Flanders. *Eur J Hum Genet* 2004;12:238–40.  
36  
37  
38 387 5. Heksch R, Kamboj M, Anglin K, et al. Review of Prader–Willi syndrome: the endocrine  
39  
40 388 approach. *Transl Pediatr* 2017;6:274–85.  
41  
42  
43 389 6. Angulo MA, Butler MG, Cataletto ME. Prader–Willi syndrome: A review of clinical, genetic,  
44  
45 390 and endocrine findings. *J Endocrinol. Invest* 2015;38:1249–63.  
46  
47  
48 391 7. Crinò A, Di Giorgio G, Livieri C, et al. A survey on Prader–Willi syndrome in the Italian  
49  
50 392 population: prevalence of historical and clinical signs. *J Pediatr Endocrinol Metab*  
51  
52 393 2009;22:883–93.  
53  
54  
55 394 8. Hartley SL, Maclean WE Jr, Butler MG, et al. Maladaptive behaviors and risk factors among  
56  
57 395 the genetic subtypes of Prader–Willi syndrome. *Am J Med Genet A* 2005;136:140–5.  
58  
59  
60

- 1  
2  
3 396 9. Manzardo AM, Loker J, Heinemann J, et al. Survival trends from the Prader–Willi Syndrome  
4  
5  
6 397 Association (USA) 40-year mortality survey. *Genet Med* 2018;20:24–30.  
7  
8 398 10. Guinovart M, Coronas R, Caixàs A. Psychopathological disorders in Prader–Willi syndrome.  
9  
10 399 *Endocrinol Diabetes Nutr* 2019;66:579–87.  
11  
12  
13 400 11. Sinnema M, Einfeld SL, Schrandt-Stumpel CT, et al. Behavioral phenotype in adults with  
14  
15 401 Prader–Willi syndrome. *Res Dev Disabil* 2011;32:604–12.  
16  
17  
18 402 12. Yang L, Zhan GD, Ding JJ, et al. Psychiatric illness and intellectual disability in the Prader–  
19  
20 403 Willi syndrome with different molecular defects—a meta analysis. *PLOS ONE*  
21  
22 2013;8:e72640.  
23 404  
24  
25 405 13. Miller JL, Lynn CH, Driscoll DC, et al. Nutritional phases in Prader–Willi syndrome. *Am J Med*  
26  
27 406 *Genet A* 2011; 155A:1040–9.  
28  
29  
30 407 14. Lanfranchi S, Vianello R. Stress, locus of control, and family cohesion and adaptability in  
31  
32 408 parents of children with Down, Williams, Fragile X, and Prader–Willi syndromes. *Am J*  
33  
34 *Intellect Dev Disabil* 2012;117:207–24.  
35 409  
36  
37 410 15. Kayadjanian N, Schwartz L, Farrar E, et al. High levels of caregiver burden in Prader–Willi  
38  
39  
40 411 syndrome. *PLOS ONE* 2018;13: e0194655.  
41  
42 412 16. Mazaheri MM, Rae-Seebach RD, Preston HE, et al. The impact of Prader–Willi syndrome on  
43  
44  
45 413 the family’s quality of life and caregiving, and the unaffected siblings’ psychosocial  
46  
47 414 adjustment. *J Intellect Disabil Res* 2013;57:861–73.  
48  
49  
50 415 17. Crinò A, Fintini D, Bocchini S, et al. Obesity management in Prader–Willi Syndrome: current  
51  
52 416 perspectives. *Diabetes Metab Syndr Obes* 2018;11:579–93.  
53  
54  
55 417 18. Gunay-Aygun M, Schwartz S, Heeger S, et al. SB. The changing purpose of Prader–Willi  
56  
57 418 syndrome clinical diagnostic criteria and proposed revised criteria. *Pediatrics*  
58  
59 419 2001;108:e92.  
60

1

2

3 420

4

5 421

6

7 422

8

9

10 423

11

12 424

13

14 425

15

16 426

17

18 427

19

20 428

21

22 429

23

24 430

25

26 431

27

28 432

29

30 433

31

32 434

33

34 435

35

36 436

37

38 437

39

40 438

41

42 439

43

44 440

45

46 441

47

48 442

49

50 443

51

52 444

53

54 445

55

56 446

57

58 447

59

60 448

19. Hartin SN, Hossain WA, Francis D, et al. Analysis of the Prader–Willi syndrome imprinting center using droplet digital PCR and next-generation whole-exome sequencing. *Mol Gen Genomic Med* 2019;7:e00575.
20. Grugni G, Marzullo P. Diagnosis and treatment of GH deficiency in Prader–Willi syndrome. *Best Pract Res Clin Endocrinol Metab* 2016;30:785–94.
21. Deal CL, Tony M, Höybye C, et al. Growth Hormone Research Society workshop summary: consensus guidelines for recombinant human growth hormone therapy in Prader–Willi syndrome. *J Clin Endocrinol Metab* 2013;98:E1072–87.
22. Sanchez-Ortiga R, Klibanski A, Tritos NA. Effects of recombinant human growth hormone therapy in adults with Prader–Willi syndrome: a meta-analysis. *Clin Endocrinol (Oxf)* 2012; 77:86–93.
23. Moix Gil E, Giménez-Palop O, Caixàs A. Treatment with growth hormone in the Prader–Willi syndrome. *Endocrinol Diabetes Nutr* 2018;65:229–36.
24. Bakker NE, Siemensma EP, van Rijn M, et al. Beneficial effect of growth hormone treatment on health-related quality of life in children with Prader–Willi Syndrome: A randomized controlled trial and longitudinal study. *Horm Res Paediatr* 2015;84:231–9.
25. Bertella L, Mori I, Grugni G, et al. Quality of life and psychological well-being in GH-treated, adult patients with PWS patients: a longitudinal study. *J Intellect Disabil Res* 2007 ;51(Pt 4):302–11.
26. Greenhalgh T. Cultural contexts of health: the use of narrative research in the health sector. Copenhagen: WHO Regional Office for Europe; 2016, Health Evidence Network (HEN) synthesis report 49. [http://www.euro.who.int/\\_\\_data/assets/pdf\\_file/0004/317623/HEN-synthesis-report-49.pdf](http://www.euro.who.int/__data/assets/pdf_file/0004/317623/HEN-synthesis-report-49.pdf) (accessed February 26, 2020).



- 1  
2  
3 444 27. Marini MG. Narrative Medicine: Bridging the Gap between Evidence-based Care and  
4  
5  
6 445 Medical Humanities. London: Springer International Publishing 2016.  
7  
8 446 28. Kleinman A. The Illness Narrative, Suffering and Healing the Human Condition. New York:  
9  
10 447 Basic Book 1989.  
11  
12  
13 448 29. Greenhalgh T, Hurwitz B. Why study narrative? *BMJ* 1999;318:48–50.  
14  
15 449 30. Banfi P, Cappuccio A, Latella ME, et al. Narrative medicine to improve the management and  
16  
17  
18 450 quality of life of patients with COPD: the first experience applying parallel chart in Italy. *Int*  
19  
20 451 *J Chron Obstruct Pulmon Dis* 2018;13:287–97.  
21  
22  
23 452 31. Marini MG, Chesi P, Mazzanti L, Guazzarotti L, et al. Stories of experiences of care for  
24  
25 453 growth hormone deficiency: the CRESCERE project. *Future Sci OA* 2016;2:FSO82.  
26  
27  
28 454 32. De Vincentis G, Monari F, Baldari S, et al. Narrative medicine in metastatic prostate cancer  
29  
30 455 reveals ways to improve patient awareness & quality of care. *Future Oncol* 2018;14:2821–  
31  
32 456 32.  
33  
34  
35 457 33. Charon R. The patient-physician relationship. Narrative Medicine: a model for empathy,  
36  
37 458 reflection, profession, and trust. *JAMA* 2001;286:1897–902.  
38  
39  
40 459 34. Marini MG, Languages of Care in Narrative Medicine. Words, Space and Time in the  
41  
42 460 Healthcare Ecosystem. London: Springer International Publishing 2019.  
43  
44  
45 461 35. Reid K, Soundy A. A qualitative study examining the illness narrative master plots of people  
46  
47 462 with head and neck cancer. *Behav Sci* 2019;9:110.  
48  
49  
50 463 36. Peeters B, Marini M. Narrative medicine across languages and cultures: using minimal  
51  
52 464 English for increased comparability of patients' narratives. In: Goddard C, ed. Minimal  
53  
54 465 English for a Global World: Improved Communication Using Fewer Words. Basingstoke,  
55  
56 466 UK: Palgrave Macmillan 2018: 259–86.  
57  
58  
59  
60

- 1  
2  
3 467 37. Personal data code protection. Legislat. Decree no. 196 of 30 June 2003. Published on the  
4  
5  
6 468 Italian Official Journal n. 174, July 29, 2003, Supplementary n. 123.  
7  
8 469 <https://www.camera.it/parlam/leggi/deleghe/Testi/03196dl.htm> (accessed June 15,  
9  
10 470 2020).  
11  
12  
13 471 38. Regulation (EU) 2016/679 of the European Parliament and of the Council of 27 April 2016  
14  
15 472 on the protection of natural persons with regard to the processing of personal data and on  
16  
17 the free movement of such data, and repealing Directive 95/46/EC (General Data  
18 473 Protection Regulation. Published on the Official Journal of the European Union L 119, May  
19  
20 474 4, 2016. <https://eur-lex.europa.eu/legal-content/EN/TXT/PDF/?uri=CELEX:32016R0679>  
21  
22 475 (accessed June 15, 2020).  
23  
24  
25 476  
26  
27  
28 477 39. Bazeley P, Jackson K. Qualitative Data Analysis with NVivo. London: SAGE 2013.  
29  
30 478 40. O'Brien BC, Harris IB, Beckman TJ, et al. Standards for reporting qualitative research: a  
31  
32 479 synthesis of recommendations. *Acad Med* 2014;89:1245–51  
33  
34  
35 480 41. Goffman E. Stigma. London: Penguin 1963.  
36  
37 481 42. Gardner H. Frames of Mind: The Theory of Multiple Intelligences. New York: Basic Books  
38  
39 482 1983.  
40  
41  
42 483 43. Semenza C, Pignatti R, Bertella L, et al. Genetics and mathematics: evidence from Prader–  
43  
44 484 Willi syndrome. *Neuropsychologia* 2008;46:206–12.  
45  
46  
47 485 44. Fanari R, Meloni C, Massidda D. Visual and spatial working memory abilities predict early  
48  
49 486 math skills: a longitudinal study. *Fron Psychol* 2019;10:2460.  
50  
51  
52 487 45. Mackenzie ML, Triador L, Gill JK, et al. Dietary intake in youth with Prader–Willi syndrome.  
53  
54 488 *Am J Med Genet A* 2018 Nov;176:2309–17.  
55  
56  
57 489 46. Rubin DA, Wilson KS, Dumont-Driscoll M, et al. Effectiveness of a parent-led physical  
58  
59 490 activity intervention in youth with obesity. *Med Sci Sports Exerc* 2019;51:805–13.  
60

- 1  
2  
3 491 47. Duis J, van Wattum PJ, Scheimann A, et al. A multidisciplinary approach to the clinical  
4  
5  
6 492 management of Prader–Willi syndrome. *Mol Genet Genomic Med* 2019;7:e514.  
7  
8 493 48. Vogels A, Scheermeyer E. Coordination of the multidisciplinary treatment efforts. In:  
9  
10 494 Hoybye C, editor. Prader–Willi Syndrome. New York: Nova Science Publishers; 2013:229–  
11  
12  
13 495 54.  
14  
15 496 49. Mackay J, McCallum Z, Ambler GR, et al. Requirements for improving health and well-being  
16  
17  
18 497 of children with Prader–Willi syndrome and their families. *J Paediatr Child Health*  
19  
20 498 2019;55:1029–37.  
21  
22  
23 499 50. Italian Ministry of Health. Piano Nazionale delle Malattie Rare 2013–2016. Rome: Ministry  
24  
25 500 of Health 2013.  
26  
27  
28 501 [http://www.europlanproject.eu/DocumentationAttachment/Italian%20National%20Plan%](http://www.europlanproject.eu/DocumentationAttachment/Italian%20National%20Plan%20for%20Rare%20Diseases%202013-2016%20-%20eng%20(en)%20%20%5Bunofficial%20version%20by%20EUROPLAN%5D.pdf)  
29  
30 502 [20for%20Rare%20Diseases%202013-2016%20-](http://www.europlanproject.eu/DocumentationAttachment/Italian%20National%20Plan%20for%20Rare%20Diseases%202013-2016%20-%20eng%20(en)%20%20%5Bunofficial%20version%20by%20EUROPLAN%5D.pdf)  
31  
32 503 [%20eng%20\(en\)%20%20%5Bunofficial%20version%20by%20EUROPLAN%5D.pdf](http://www.europlanproject.eu/DocumentationAttachment/Italian%20National%20Plan%20for%20Rare%20Diseases%202013-2016%20-%20eng%20(en)%20%20%5Bunofficial%20version%20by%20EUROPLAN%5D.pdf) (accessed  
33  
34  
35 504 February 26, 2020).  
36  
37 505 51. Ali SR, Bryce J, Cools M et al. The current landscape of European registries for rare  
38  
39  
40 506 endocrine conditions. *Eur J Endocrinol* 2019;180:89–98.  
41  
42 507 52. Augustine EF, Dorsey ER, Saltonstall PL. The care continuum: an evolving model for care  
43  
44  
45 508 and research in rare diseases. *Pediatrics* 2017;140.

46  
47 509 **Figure legend**

48  
49  
50 510 Figure 1 – Age of children with PWS at diagnosis  
51  
52  
53  
54  
55  
56  
57  
58  
59  
60

1  
2  
3  
4  
5  
6  
7  
8  
9  
10  
11  
12  
13  
14  
15  
16  
17  
18  
19  
20  
21  
22  
23  
24  
25  
26  
27  
28  
29  
30  
31  
32  
33  
34  
35  
36  
37  
38  
39  
40  
41  
42  
43  
44  
45  
46  
47  
48  
49  
50  
51  
52  
53  
54  
55  
56  
57  
58  
59  
60

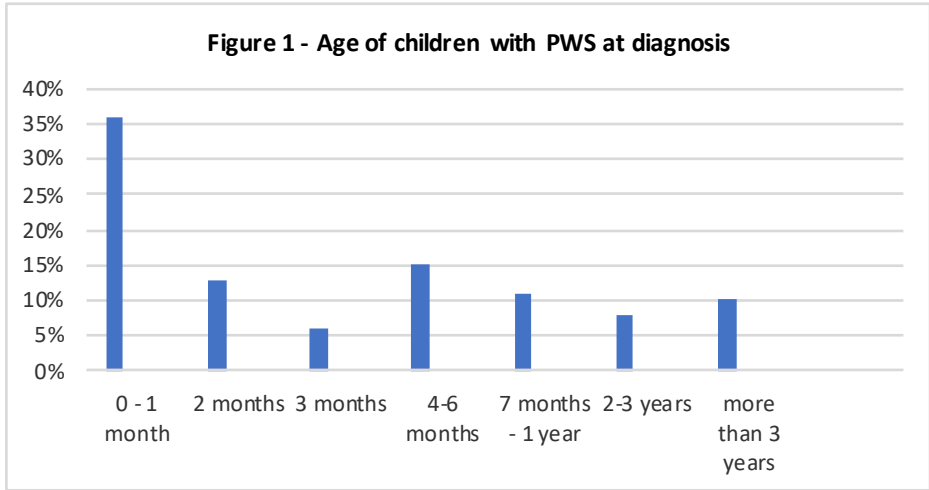

Or peer review only

## Supplement 1

### Medical centres for paediatric and adult patients of the Italian Network for Rare Disease

OASI Maria SS., Research Institute, Troina (Enna), Italy

Bambino Gesù Paediatric Hospital, Research Institute, Palidoro (Rome), Italy

Istituto Auxologico Italiano, Research Institute, Piancavallo (Oggebbio, Verbania), Italy

Obesity and Endocrine Disease Unit, Department of Neuroscience, Santobono-Pausilipon

Children's Hospital, Naples, Italy

Department of Biomedical Sciences and Human Oncology, University of Bari "A. Moro", Bari, Italy

Department of Human Pathology of Adulthood and Childhood "G.Barresi", University of Messina, Italy

Metabolic Diseases, Clinical Genetics and Diabetology Unit, Giovanni XXIII Children's Hospital, Bari, Italy

Department of Translational Sciences, University Federico II, Naples, Italy

Department of Paediatrics, Casa Sollievo della Sofferenza Research Institute, San Giovanni Rotondo (Foggia), Italy

Neonatology Unit, Spirito Santo Hospital, Pescara, Italy

## Supplement 2

### Illness plot addressed to underaged people with PWS

Hi! Can you tell us about yourself? [...] May you introduce yourself and tell us about your life [...]. How do you feel with your friends [...], your schoolmates [...], and teachers? [...] You know that eating too much is not good for you: what do you do for not eating too much? [...] How do you feel with your family? [...] Can you tell us about your visits to the doctors? [...] What is your favorite game? [...] What will you do when you grow up? [...]

Thank you for the time and energy you dedicated. One last question:

How did you feel in narrating your experience? [...]

### Illness plot addressed to adult people with PWS

I introduce myself [...]. I feel [...]; at home [...]; at work [...]. The people next to me [...]. The food [...]. The treatments [...]. What I like to do [...]. For me, I think of a future [...].

Thank you for the time and energy you dedicated. One last question:

How did you feel in narrating your experience? [...]

### Illness plot addressed to caregivers of people with PWS

When I felt the first signs that something was going wrong [...] I feel [...]. They told us that it was [...]. The hospitals I visited, the professionals I met [...]. That period at home [...], at work [...]. The people next to me [...]. People around the person with PWS [...]. Food [...], and treatments [...]. Today the person with PWS [...], and treatments [...]; I feel [...]. At home, people with PWS [...]. Outside domestic context, the person with PWS [...]. What I like to do [...]; what the person with PWS likes, beyond food [...]. My life at home is [...]; the food [...]. I look at the person with PWS and I think for her/him a future [...], and for me I imagine a future [...].

1  
2  
3 Thank you for the time and energy you dedicated. One last question:  
4

5 How did you feel in narrating your experience? [...]  
6  
7  
8  
9  
10  
11  
12  
13  
14  
15  
16  
17  
18  
19  
20  
21  
22  
23  
24  
25  
26  
27  
28  
29  
30  
31  
32  
33  
34  
35  
36  
37  
38  
39  
40  
41  
42  
43  
44  
45  
46  
47  
48  
49  
50  
51  
52  
53  
54  
55  
56  
57  
58  
59  
60

For peer review only

# Reporting checklist for qualitative study.

Based on the SRQR guidelines.

## Instructions to authors

Complete this checklist by entering the page numbers from your manuscript where readers will find each of the items listed below.

Your article may not currently address all the items on the checklist. Please modify your text to include the missing information. If you are certain that an item does not apply, please write "n/a" and provide a short explanation.

Upload your completed checklist as an extra file when you submit to a journal.

In your methods section, say that you used the SRQR reporting guidelines, and cite them as:

O'Brien BC, Harris IB, Beckman TJ, Reed DA, Cook DA. Standards for reporting qualitative research: a synthesis of recommendations. Acad Med. 2014;89(9):1245-1251.

|                     | Reporting Item                                                                                                                                                                                                                                          | Page Number |
|---------------------|---------------------------------------------------------------------------------------------------------------------------------------------------------------------------------------------------------------------------------------------------------|-------------|
| <b>Title</b>        |                                                                                                                                                                                                                                                         |             |
|                     | <a href="#">#1</a> Concise description of the nature and topic of the study identifying the study as qualitative or indicating the approach (e.g. ethnography, grounded theory) or data collection methods (e.g. interview, focus group) is recommended | 1           |
| <b>Abstract</b>     |                                                                                                                                                                                                                                                         |             |
|                     | <a href="#">#2</a> Summary of the key elements of the study using the abstract format of the intended publication; typically includes background, purpose, methods, results and conclusions                                                             | 2           |
| <b>Introduction</b> |                                                                                                                                                                                                                                                         |             |



|    |                           |                    |                                                           |     |
|----|---------------------------|--------------------|-----------------------------------------------------------|-----|
| 1  | Problem formulation       | <a href="#">#3</a> | Description and significance of the problem /             | 3-4 |
| 2  |                           |                    | phenomenon studied: review of relevant theory and         |     |
| 3  |                           |                    | empirical work; problem statement                         |     |
| 4  |                           |                    |                                                           |     |
| 5  |                           |                    |                                                           |     |
| 6  | Purpose or research       | <a href="#">#4</a> | Purpose of the study and specific objectives or           | 5   |
| 7  | question                  |                    | questions                                                 |     |
| 8  |                           |                    |                                                           |     |
| 9  |                           |                    |                                                           |     |
| 10 | <b>Methods</b>            |                    |                                                           |     |
| 11 |                           |                    |                                                           |     |
| 12 |                           |                    |                                                           |     |
| 13 | Qualitative approach and  | <a href="#">#5</a> | Qualitative approach (e.g. ethnography, grounded          | 4-6 |
| 14 | research paradigm         |                    | theory, case study, phenomenology, narrative              |     |
| 15 |                           |                    | research) and guiding theory if appropriate; identifying  |     |
| 16 |                           |                    | the research paradigm (e.g. postpositivist,               |     |
| 17 |                           |                    | constructivist / interpretivist) is also recommended;     |     |
| 18 |                           |                    | rationale. The rationale should briefly discuss the       |     |
| 19 |                           |                    | justification for choosing that theory, approach,         |     |
| 20 |                           |                    | method or technique rather than other options             |     |
| 21 |                           |                    | available; the assumptions and limitations implicit in    |     |
| 22 |                           |                    | those choices and how those choices influence study       |     |
| 23 |                           |                    | conclusions and transferability. As appropriate the       |     |
| 24 |                           |                    | rationale for several items might be discussed            |     |
| 25 |                           |                    | together.                                                 |     |
| 26 |                           |                    |                                                           |     |
| 27 |                           |                    |                                                           |     |
| 28 |                           |                    |                                                           |     |
| 29 |                           |                    |                                                           |     |
| 30 |                           |                    |                                                           |     |
| 31 |                           |                    |                                                           |     |
| 32 |                           |                    |                                                           |     |
| 33 |                           |                    |                                                           |     |
| 34 | Researcher                | <a href="#">#6</a> | Researchers' characteristics that may influence the       | 7   |
| 35 | characteristics and       |                    | research, including personal attributes, qualifications / |     |
| 36 | reflexivity               |                    | experience, relationship with participants,               |     |
| 37 |                           |                    | assumptions and / or presuppositions; potential or        |     |
| 38 |                           |                    | actual interaction between researchers'                   |     |
| 39 |                           |                    | characteristics and the research questions, approach,     |     |
| 40 |                           |                    | methods, results and / or transferability                 |     |
| 41 |                           |                    |                                                           |     |
| 42 |                           |                    |                                                           |     |
| 43 |                           |                    |                                                           |     |
| 44 |                           |                    |                                                           |     |
| 45 |                           |                    |                                                           |     |
| 46 | Context                   | <a href="#">#7</a> | Setting / site and salient contextual factors; rationale  | 5-6 |
| 47 |                           |                    |                                                           |     |
| 48 | Sampling strategy         | <a href="#">#8</a> | How and why research participants, documents, or          | 6   |
| 49 |                           |                    | events were selected; criteria for deciding when no       |     |
| 50 |                           |                    | further sampling was necessary (e.g. sampling             |     |
| 51 |                           |                    | saturation); rationale                                    |     |
| 52 |                           |                    |                                                           |     |
| 53 |                           |                    |                                                           |     |
| 54 |                           |                    |                                                           |     |
| 55 | Ethical issues pertaining | <a href="#">#9</a> | Documentation of approval by an appropriate ethics        | 7-8 |
| 56 | to human subjects         |                    | review board and participant consent, or explanation      |     |
| 57 |                           |                    |                                                           |     |
| 58 |                           |                    |                                                           |     |
| 59 |                           |                    |                                                           |     |
| 60 |                           |                    |                                                           |     |

for lack thereof; other confidentiality and data security issues

|    |                         |                     |                                                           |
|----|-------------------------|---------------------|-----------------------------------------------------------|
| 1  |                         |                     |                                                           |
| 2  |                         |                     |                                                           |
| 3  |                         |                     |                                                           |
| 4  | Data collection methods | <a href="#">#10</a> | Types of data collected; details of data collection 7     |
| 5  |                         |                     |                                                           |
| 6  |                         |                     | procedures including (as appropriate) start and stop      |
| 7  |                         |                     | dates of data collection and analysis, iterative          |
| 8  |                         |                     | process, triangulation of sources / methods, and          |
| 9  |                         |                     | modification of procedures in response to evolving        |
| 10 |                         |                     | study findings; rationale                                 |
| 11 |                         |                     |                                                           |
| 12 |                         |                     |                                                           |
| 13 |                         |                     |                                                           |
| 14 | Data collection         | <a href="#">#11</a> | Description of instruments (e.g. interview guides, 7      |
| 15 | instruments and         |                     | questionnaires) and devices (e.g. audio recorders)        |
| 16 | technologies            |                     | used for data collection; if / how the instruments(s)     |
| 17 |                         |                     | changed over the course of the study                      |
| 18 |                         |                     |                                                           |
| 19 |                         |                     |                                                           |
| 20 |                         |                     |                                                           |
| 21 | Units of study          | <a href="#">#12</a> | Number and relevant characteristics of participants, 9    |
| 22 |                         |                     | documents, or events included in the study; level of      |
| 23 |                         |                     | participation (could be reported in results)              |
| 24 |                         |                     |                                                           |
| 25 |                         |                     |                                                           |
| 26 |                         |                     |                                                           |
| 27 | Data processing         | <a href="#">#13</a> | Methods for processing data prior to and during 8         |
| 28 |                         |                     | analysis, including transcription, data entry, data       |
| 29 |                         |                     | management and security, verification of data             |
| 30 |                         |                     | integrity, data coding, and anonymisation /               |
| 31 |                         |                     | deidentification of excerpts                              |
| 32 |                         |                     |                                                           |
| 33 |                         |                     |                                                           |
| 34 |                         |                     |                                                           |
| 35 | Data analysis           | <a href="#">#14</a> | Process by which inferences, themes, etc. were 8          |
| 36 |                         |                     | identified and developed, including the researchers       |
| 37 |                         |                     | involved in data analysis; usually references a specific  |
| 38 |                         |                     | paradigm or approach; rationale                           |
| 39 |                         |                     |                                                           |
| 40 |                         |                     |                                                           |
| 41 |                         |                     |                                                           |
| 42 |                         |                     |                                                           |
| 43 | Techniques to enhance   | <a href="#">#15</a> | Techniques to enhance trustworthiness and credibility 8   |
| 44 | trustworthiness         |                     | of data analysis (e.g. member checking, audit trail,      |
| 45 |                         |                     | triangulation); rationale                                 |
| 46 |                         |                     |                                                           |
| 47 |                         |                     |                                                           |
| 48 | <b>Results/findings</b> |                     |                                                           |
| 49 |                         |                     |                                                           |
| 50 |                         |                     |                                                           |
| 51 | Syntheses and           | <a href="#">#16</a> | Main findings (e.g. interpretations, inferences, and 9-10 |
| 52 | interpretation          |                     | themes); might include development of a theory or         |
| 53 |                         |                     | model, or integration with prior research or theory       |
| 54 |                         |                     |                                                           |
| 55 |                         |                     |                                                           |
| 56 | Links to empirical data | <a href="#">#17</a> | Evidence (e.g. quotes, field notes, text excerpts, 10-16  |
| 57 |                         |                     | photographs) to substantiate analytic findings            |
| 58 |                         |                     |                                                           |
| 59 |                         |                     |                                                           |
| 60 |                         |                     |                                                           |

## Discussion

|                                                                                              |                     |                                                                                                                                                                                                                                                                                                          |       |
|----------------------------------------------------------------------------------------------|---------------------|----------------------------------------------------------------------------------------------------------------------------------------------------------------------------------------------------------------------------------------------------------------------------------------------------------|-------|
| Intergration with prior work, implications, transferability and contribution(s) to the field | <a href="#">#18</a> | Short summary of main findings; explanation of how findings and conclusions connect to, support, elaborate on, or challenge conclusions of earlier scholarship; discussion of scope of application / generalizability; identification of unique contributions(s) to scholarship in a discipline or field | 16-19 |
| Limitations                                                                                  | <a href="#">#19</a> | Trustworthiness and limitations of findings                                                                                                                                                                                                                                                              | 19    |
| <b>Other</b>                                                                                 |                     |                                                                                                                                                                                                                                                                                                          |       |
| Conflicts of interest                                                                        | <a href="#">#20</a> | Potential sources of influence of perceived influence on study conduct and conclusions; how these were managed                                                                                                                                                                                           | 20    |
| Funding                                                                                      | <a href="#">#21</a> | Sources of funding and other support; role of funders in data collection, interpretation and reporting                                                                                                                                                                                                   | 20    |

None The SRQR checklist is distributed with permission of Wolters Kluwer © 2014 by the Association of American Medical Colleges. This checklist can be completed online using <https://www.goodreports.org/>, a tool made by the [EQUATOR Network](#) in collaboration with [Penelope.ai](#)
