# Supplementary material for: Caring and living with Prader-Willi syndrome in Italy: integrating children, adults and parents’ experiences through a multicentre narrative medicine research
Source: PubMed Central journal article supplement — BMJ Open. 2020 Aug 6;10(8):e036502. doi: 10.1136/bmjopen-2019-036502 (PMC7412587; doi:10.1136/bmjopen-2019-036502), 2020-08-06
Supplement: bmjopen-2019-036502supp001.pdf [file bmjopen-2019-036502supp001.pdf]

## Supplement 1

### Medical centres for paediatric and adult patients of the Italian Network for Rare Disease

OASI Maria SS., Research Institute, Troina (Enna), Italy

Bambino Gesù Paediatric Hospital, Research Institute, Palidoro (Rome), Italy

Istituto Auxologico Italiano, Research Institute, Piancavallo (Oggebbio, Verbania), Italy

Obesity and Endocrine Disease Unit, Department of Neuroscience, Santobono-Pausilipon Children's Hospital, Naples, Italy

Department of Biomedical Sciences and Human Oncology, University of Bari "A. Moro", Bari, Italy

Department of Human Pathology of Adulthood and Childhood "G.Barresi", University of Messina, Italy

Metabolic Diseases, Clinical Genetics and Diabetology Unit, Giovanni XXIII Children's Hospital, Bari, Italy

Department of Translational Sciences, University Federico II, Naples, Italy

Department of Paediatrics, Casa Sollievo della Sofferenza Research Institute, San Giovanni Rotondo (Foggia), Italy

Neonatology Unit, Spirito Santo Hospital, Pescara, Italy
